# Supplementary material for: Metal free access to amide compounds via peroxide-mediated NN double bond cleavage of azobenzenes
Source: Royal Society of Chemistry journal article supplement (doi:10.1039/c5qo00125k), 2015-01-01

## Supporting Information

### **Metal free access to amide compounds *via* peroxide-mediated N=N double bond cleavage of azobenzenes**

Gang Hong,<sup>a</sup> Dan Mao,<sup>a</sup> Xiaoyan Zhu,<sup>a</sup> Shengying Wu<sup>\*a</sup> and Limin Wang<sup>\*a</sup>

*Key Laboratory for Advanced Materials and Institute of Fine Chemicals, East China University of Science and Technology, 130 Meilong Road, Shanghai 200237, P. R. China Phone (fax): +86-21-64253881;  
E-mail: [wanglimin@ecust.edu.cn](mailto:wanglimin@ecust.edu.cn); [wsy1986wsy@126.com](mailto:wsy1986wsy@126.com)*

|                                                                |            |
|----------------------------------------------------------------|------------|
| <b>1. General experimental details.....</b>                    | <b>S2</b>  |
| <b>2. Experimental characterization data for products.....</b> | <b>S4</b>  |
| <b>3. References.....</b>                                      | <b>S12</b> |
| <b>4. NMR spectra.....</b>                                     | <b>S13</b> |

## 1. General experimental details

<sup>1</sup>H NMR and <sup>13</sup>C NMR spectra were recorded at 400 MHz and 100 MHz, respectively using tetramethylsilane as an internal reference. Chemical shifts ( $\delta$ ) and coupling constants ( $J$ ) were expressed in parts per million and hertz, respectively. Melting points were uncorrected. High Resolution Mass spectra (HRMS) were performed on an ESI-TOF spectrometer. All reagents were obtained from commercial sources and used without further purification except as indicated below: DCE and benzaldehyde were purified according to the Purification of Laboratory Chemicals book, and azobenzenes were prepared according to the literature procedure.<sup>1</sup>

### 1.1 Optimization study for the reaction of azobenzene with benzyl amine<sup>a</sup>

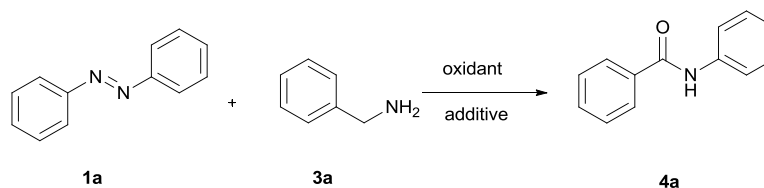

| Entry | Oxidant                                      | Additive (equiv)                     | Solvent            | T (°C) | Yield (%) <sup>b</sup> |
|-------|----------------------------------------------|--------------------------------------|--------------------|--------|------------------------|
| 1     | TBHP                                         | KOH (1.0)                            | DCE                | 120    | 34                     |
| 2     | TBHP                                         | K <sub>2</sub> CO <sub>3</sub> (1.0) | DCE                | 120    | 23                     |
| 3     | TBHP                                         | <sup>t</sup> BuOK (1.0)              | DCE                | 120    | 57                     |
| 4     | TBHP                                         | KI (1.0)                             | DCE                | 120    | N.P.                   |
| 5     | TBHP                                         | NBS (1.0)                            | DCE                | 120    | 17                     |
| 6     | TBHP                                         | TBAB (1.0)                           | DCE                | 120    | 70                     |
| 7     | TBHP                                         | TBAI (0.2)                           | DCE                | 120    | N.P.                   |
| 8     | TBHP                                         | CuBr (0.2)                           | DCE                | 120    | N.P.                   |
| 9     | TBHP                                         | /                                    | DCE                | 120    | 72                     |
| 10    | DTBP                                         | /                                    | DCE                | 120    | N.P.                   |
| 11    | K <sub>2</sub> S <sub>2</sub> O <sub>8</sub> | /                                    | DCE                | 120    | N.P.                   |
| 12    | TBPB                                         | /                                    | DCE                | 120    | 44                     |
| 13    | TBHP                                         | /                                    | CH <sub>3</sub> CN | 120    | 54                     |
| 14    | TBHP                                         | /                                    | Dioxane            | 120    | 57                     |
| 15    | TBHP                                         | /                                    | DMF                | 120    | N.P.                   |
| 16    | TBHP                                         | /                                    | DMSO               | 120    | N.P.                   |
| 17    | TBHP                                         | /                                    | DCE                | 80     | 17                     |
| 18    | TBHP                                         | /                                    | DCE                | rt     | N.P.                   |

<sup>a</sup>Reaction conditions: **1a** (0.25 mmol), **3a** (0.5 mmol), oxidant (4.0 equiv), additive, solvent (1.0 mL), 24 h, air. <sup>b</sup>Isolated yield.

**1.2 General procedure for preparation of azobenzenes:** Arylamine (1.0 mmol), CuBr (4.2 mg, 0.03 mmol), pyridine (8.7 mg, 0.09 mmol), and toluene (4 mL) were added together. The mixture was stirred at 60 °C under air for 20 h, then cooled down to room temperature. The mixture was evaporated under vacuum. The corresponding azobenzene was isolated by silica gel column chromatography with a petroleum ether/ethyl acetate mixture as eluent.

### 1.3 Typical procedure for TBHP-mediated reaction of aldehydes or benzyl amines with azobenzenes:

The mixture of azobenzenes **1** (0.25 mmol), aldehydes **2** (0.25 mmol) (or benzyl amines **3** (0.5 mmol)), TBHP (1.0 mmol) and DCE (1 mL) were added into a sealed tube. After being stirred vigorously at 120 °C for 24 h, the mixture was evaporated under vacuum. The corresponding product was isolated by silica gel column chromatography with a petroleum ether/ethyl acetate mixture as eluent.

### 1.4 The GC-MS and HRMS spectra about the reaction mixture.

The mixture of azobenzene **1a** (0.25 mmol), benzaldehyde **2a** (0.25 mmol), TBHP (1.0 mmol) and DCE (1 mL) were added into a sealed tube. After being stirred vigorously at 120 °C for 24 h, part of the mixture was analyzed by GC-MS and HRMS, respectively.

The by-product azoxybenzene was detected by HRMS spectrum of reaction mixture:

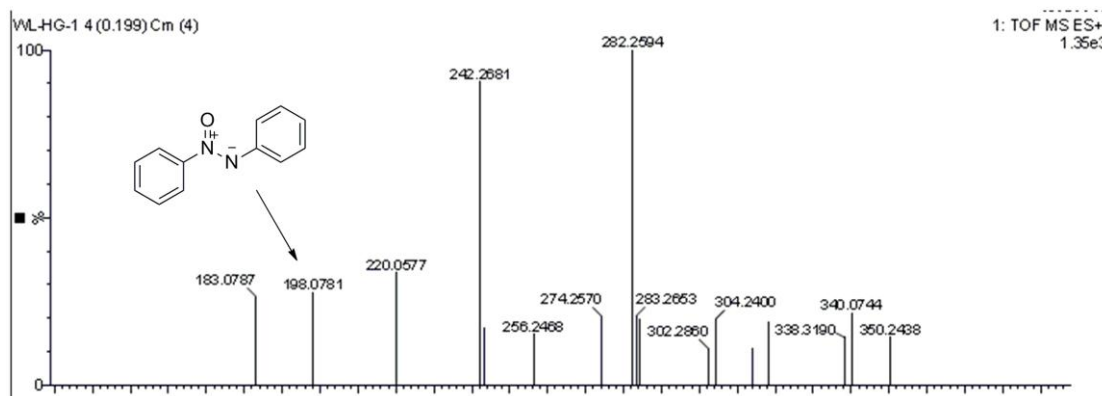

Figure S1. The HRMS spectrum of the reaction mixture

The corresponding GC-MS spectra about the by-product nitrobenzene was shown in Figure 2 and Figure 3.

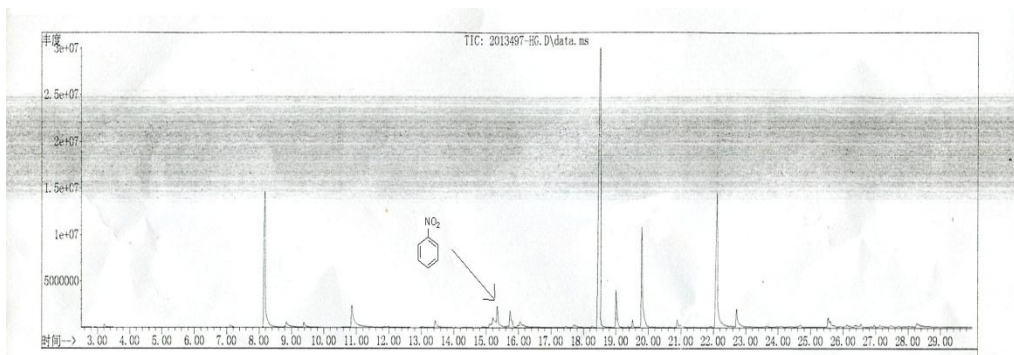

Figure S2. The GC-MS spectra from the reaction mixture which was carried out for 24 h

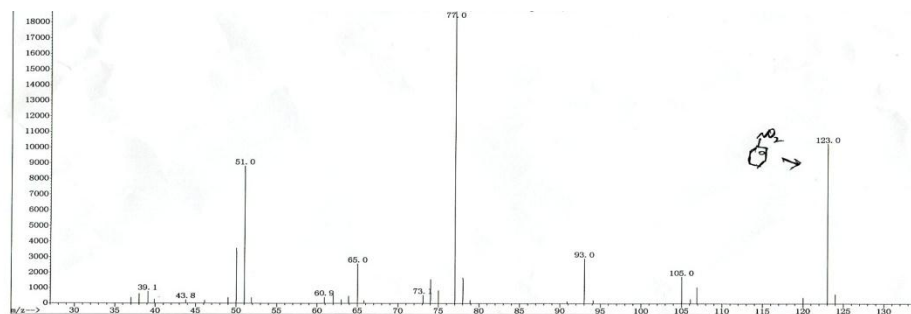

Figure S3. The GC-MS spectra of nitrobenzene

## 2. Experimental characterization data for products

### *N*-phenylbenzamide (4a)<sup>2</sup>

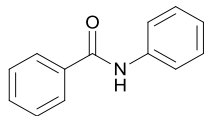

White solid. 40 mg, 81% yield. <sup>1</sup>H NMR (400 MHz, CDCl<sub>3</sub>): δ 7.88 (d, *J* = 7.2 Hz, 2H), 7.80 (s, 1H), 7.65 (d, *J* = 7.6 Hz, 2H), 7.59-7.47 (m, 3H), 7.38 (t, *J* = 7.6 Hz, 2H), 7.16 (t, *J* = 7.6 Hz, 1H). <sup>13</sup>C NMR (100 MHz, CDCl<sub>3</sub>): δ 165.8, 137.9, 135.0, 131.9, 129.1, 128.8, 127.0, 124.6, 120.2. HRMS (ESI-TOF) *m/z*: [M + H]<sup>+</sup> Calcd for C<sub>13</sub>H<sub>12</sub>NO 198.0919; Found 198.0930

### *N*-(*o*-tolyl)benzamide (4b)<sup>2</sup>

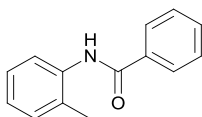

White solid. 25 mg, 47% yield. <sup>1</sup>H NMR (400 MHz, CDCl<sub>3</sub>): δ 8.02 (d, *J* = 7.6 Hz, 1H), 7.97 (d, *J* = 7.2 Hz, 2H), 7.78 (s, 1H), 7.67-7.55 (m, 3H), 7.37-7.30 (m, 2H), 7.20 (t, *J* = 7.6 Hz, 1H), 2.42 (s, 3H). <sup>13</sup>C NMR (100 MHz, CDCl<sub>3</sub>): δ 165.8, 134.7, 134.0, 132.6, 130.8, 129.5, 127.8, 126.0, 125.9, 124.4, 122.0, 16.8. HRMS (ESI-TOF) *m/z*: [M + H]<sup>+</sup> Calcd for C<sub>14</sub>H<sub>14</sub>NO 212.1075; Found 212.1066

### *N*-(*m*-tolyl)benzamide (4c)<sup>2</sup>

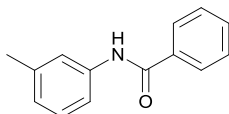

White solid. 37 mg, 70% yield. <sup>1</sup>H NMR (400 MHz, CDCl<sub>3</sub>): δ 8.11 (d, *J* = 6.8 Hz, 1H), 7.93 (s, 1H), 7.85 (d, *J* = 7.2 Hz, 2H), 7.63-7.39 (m, 4H), 7.23 (t, *J* = 8.0 Hz, 1H), 6.96 (d, *J* = 7.2 Hz, 1H), 2.34 (s, 3H). <sup>13</sup>C NMR (100 MHz, CDCl<sub>3</sub>): δ 165.9, 139.0, 137.8, 135.0, 133.7, 131.8, 130.2, 128.5, 127.1, 125.4, 121.0, 117.4, 21.5. HRMS (ESI-TOF) *m/z*: [M + H]<sup>+</sup> Calcd for C<sub>14</sub>H<sub>14</sub>NO 212.1075; Found 212.1067

### *N*-(*p*-tolyl)benzamide (4d)<sup>2</sup>

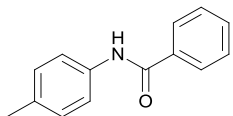

White solid. 38 mg, 72% yield. <sup>1</sup>H NMR (400 MHz, CDCl<sub>3</sub>): δ 8.12 (d, *J* = 7.2 Hz, 1H), 7.86 (d, *J* = 6.8 Hz, 2H), 7.80 (s, 1H), 7.54-7.45 (m, 4H), 7.18 (d, *J* = 8.0 Hz, 2H), 2.34 (s, 3H). <sup>13</sup>C NMR (100 MHz, CDCl<sub>3</sub>): δ 165.7, 135.4, 135.1, 134.2, 131.7, 129.6, 128.7, 127.0, 120.4, 20.9. HRMS (ESI-TOF) *m/z*: [M + H]<sup>+</sup> Calcd for C<sub>14</sub>H<sub>14</sub>NO 212.1075; Found 212.1078

### *N*-(4-methoxyphenyl)benzamide (4e)<sup>2</sup>

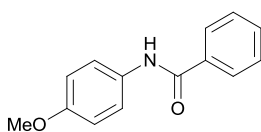

Pale yellow solid. 24 mg, 41% yield. <sup>1</sup>H NMR (400 MHz, CDCl<sub>3</sub>): δ 7.86 (d, *J* = 7.2 Hz, 2H), 7.56-7.51 (m,

3H), 7.47 (t,  $J = 7.6$  Hz, 2H), 6.90 (d,  $J = 8.8$  Hz, 2H), 3.81 (s, 3H).  $^{13}\text{C}$  NMR (100 MHz,  $\text{CDCl}_3$ ):  $\delta$  165.7, 135.6, 135.0, 131.7, 131.0, 128.7, 128.4, 127.0, 122.1, 114.2, 55.5. HRMS (ESI-TOF)  $m/z$ :  $[\text{M} + \text{H}]^+$  Calcd for  $\text{C}_{14}\text{H}_{14}\text{NO}_2$  228.1025; Found 228.1024

***N*-(4-fluorophenyl)benzamide (4f)<sup>2</sup>**

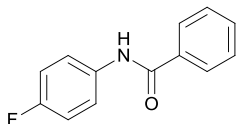

Pale yellow solid. 34 mg, 64% yield.  $^1\text{H}$  NMR (400 MHz,  $\text{CDCl}_3$ ):  $\delta$  8.11 (d,  $J = 7.2$  Hz, 1H), 7.87 (d,  $J = 7.2$  Hz, 2H), 7.84 (s, 1H), 7.52-7.47 (m, 4H), 7.07 (t,  $J = 8.4$  Hz, 2H).  $^{13}\text{C}$  NMR (100 MHz,  $\text{CDCl}_3$ ):  $\delta$  165.7, 160.8, 158.3, 134.7, 133.6, 131.9, 130.2, 128.8, 128.5, 127.0, 122.1 ( $J = 7.7$  Hz), 115.9, 115.7. HRMS (ESI-TOF)  $m/z$ :  $[\text{M} - \text{H}]^-$  Calcd for  $\text{C}_{13}\text{H}_9\text{FNO}$  214.0668; Found 214.0661

***N*-(4-chlorophenyl)benzamide (4g)<sup>2</sup>**

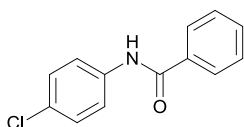

Pale yellow solid. 43 mg, 75% yield.  $^1\text{H}$  NMR (400 MHz,  $\text{CDCl}_3$ ):  $\delta$  8.11 (d,  $J = 7.2$  Hz, 1H), 7.86 (d,  $J = 7.2$  Hz, 2H), 7.83 (bs, 1H), 7.53-7.46 (m, 4H), 7.34 (d,  $J = 8.8$  Hz, 2H).  $^{13}\text{C}$  NMR (100 MHz,  $\text{CDCl}_3$ ):  $\delta$  165.7, 136.5, 134.6, 132.1, 130.2, 129.6, 129.1, 128.9, 127.0, 121.4. HRMS (ESI-TOF)  $m/z$ :  $[\text{M} + \text{H}]^+$  Calcd for  $\text{C}_{13}\text{H}_{11}\text{ClNO}$  232.0529; Found 232.0513

***N*-(4-bromophenyl)benzamide (4h)<sup>3</sup>**

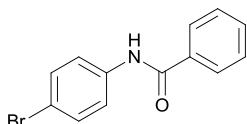

Pale yellow solid. 62 mg, 91% yield.  $^1\text{H}$  NMR (400 MHz,  $\text{CDCl}_3$ ):  $\delta$  8.12 (d,  $J = 7.2$  Hz, 1H), 7.86 (d,  $J = 7.2$  Hz, 1H), 7.82 (s, 1H), 7.58-7.47 (m, 7H).  $^{13}\text{C}$  NMR (100 MHz,  $\text{CDCl}_3$ ):  $\delta$  162.6, 134.6, 133.7, 132.1, 132.0, 128.9, 127.0, 121.7, 117.2. HRMS (ESI-TOF)  $m/z$ :  $[\text{M} - \text{H}]^-$  Calcd for  $\text{C}_{13}\text{H}_9\text{BrNO}$  273.9868; Found 273.9833

***N*-(3-chlorophenyl)benzamide (4i)<sup>2</sup>**

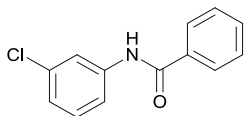

Pale yellow solid. 33 mg, 57% yield.  $^1\text{H}$  NMR (400 MHz,  $\text{CDCl}_3$ ):  $\delta$  8.11 (d,  $J = 7.2$  Hz, 1H), 8.04 (s, 1H), 7.77-7.75 (m, 1H), 7.50-7.42 (m, 5H), 7.28-7.23 (m, 1H), 7.13-7.09 (m, 1H).  $^{13}\text{C}$  NMR (100 MHz,  $\text{CDCl}_3$ ):  $\delta$  165.9, 139.1, 134.7, 134.5, 132.1, 130.0, 128.8, 127.1, 124.6, 120.4, 118.3. HRMS (ESI-TOF)  $m/z$ :  $[\text{M} + \text{H}]^+$  Calcd for  $\text{C}_{13}\text{H}_{11}\text{ClNO}$  232.0529; Found 232.0523

***N*-(3-bromophenyl)benzamide (4j)<sup>2</sup>**

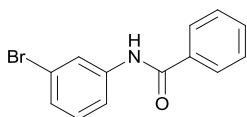

White soild. 40 mg, 58% yield.  $^1\text{H NMR}$  (400 MHz,  $\text{CDCl}_3$ ):  $\delta$  8.03 (s, 1H), 7.91-7.82 (m, 3H), 7.54 (t,  $J = 7.2$  Hz, 2H), 7.45 (t,  $J = 7.2$  Hz, 2H), 7.28-7.17 (m, 2H).  $^{13}\text{C NMR}$  (100 MHz,  $\text{CDCl}_3$ ):  $\delta$  165.9, 139.2, 134.5, 132.1, 130.3, 128.5, 127.6, 127.1, 123.2, 122.7, 118.8. HRMS (ESI-TOF)  $m/z$ :  $[\text{M} + \text{H}]^+$  Calcd for  $\text{C}_{13}\text{H}_{11}\text{BrNO}$  276.0024; Found 276.0021

#### ethyl 4-benzamidobenzoate (4k)<sup>4</sup>

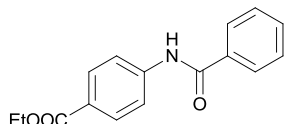

White soild. 55 mg, 82% yield.  $^1\text{H NMR}$  (400 MHz,  $\text{CDCl}_3$ ):  $\delta$  8.27 (s, 1H), 8.03 (d,  $J = 8.8$  Hz, 2H), 7.87 (d,  $J = 7.2$  Hz, 2H), 7.75 (d,  $J = 8.8$  Hz, 2H), 7.57-7.53 (m, 1H), 7.45 (t,  $J = 7.2$  Hz, 2H), 4.35 (q,  $J = 7.2$  Hz, 2H), 1.39 (t,  $J = 7.2$  Hz, 3H).  $^{13}\text{C NMR}$  (100 MHz,  $\text{CDCl}_3$ ):  $\delta$  166.2, 166.0, 142.2, 134.5, 132.2, 130.8, 128.8, 127.1, 126.1, 119.3, 60.9, 14.4. HRMS (ESI-TOF)  $m/z$ :  $[\text{M} + \text{H}]^+$  Calcd for  $\text{C}_{16}\text{H}_{16}\text{NO}_3$  270.1130; Found 270.1129

#### *N*-(4-(trifluoromethoxy)phenyl)benzamide (4l)

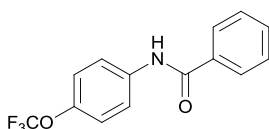

White soild. 49 mg, 70% yield. mp: 176-178 °C.  $^1\text{H NMR}$  (400 MHz,  $\text{CDCl}_3$ ):  $\delta$  8.11 (d,  $J = 6.8$  Hz, 1H), 7.87 (d,  $J = 7.2$  Hz, 2H), 7.61-7.46 (m, 4H), 7.23 (d,  $J = 8.4$  Hz, 2H).  $^{13}\text{C NMR}$  (100 MHz,  $\text{CDCl}_3$ ):  $\delta$  165.8, 136.5, 134.5, 133.7, 132.1, 130.2, 128.9, 128.5, 127.0, 121.9, 121.3. HRMS (ESI-TOF)  $m/z$ :  $[\text{M} - \text{H}]^-$  Calcd for  $\text{C}_{14}\text{H}_9\text{F}_3\text{NO}_2$  280.0585; Found 280.0573

#### *N*-(2,4-dimethylphenyl)benzamide (4m)<sup>3</sup>

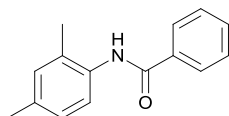

Pale yellow soild. 16 mg, 29% yield.  $^1\text{H NMR}$  (400 MHz,  $\text{CDCl}_3$ ):  $\delta$  8.13 (d,  $J = 7.2$  Hz, 2H), 7.89 (d,  $J = 6.8$  Hz, 1H), 7.63-7.46 (m, 5H), 7.12-7.02 (m, 1H), 2.32 (s, 3H), 2.30 (s, 3H).  $^{13}\text{C NMR}$  (100 MHz,  $\text{CDCl}_3$ ):  $\delta$  172.1, 139.1, 133.8, 131.8, 131.3, 130.2, 129.4, 128.8, 128.5, 127.4, 127.3, 20.9, 17.8. HRMS (ESI-TOF)  $m/z$ :  $[\text{M} + \text{H}]^+$  Calcd for  $\text{C}_{15}\text{H}_{16}\text{NO}$  226.1232; Found 226.1226

#### 2-methyl-*N*-phenylbenzamide (4n)<sup>2</sup>

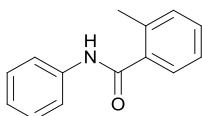

White soild. 30 mg, 57% yield.  $^1\text{H NMR}$  (400 MHz,  $\text{CDCl}_3$ ):  $\delta$  7.61 (d,  $J = 8.0$  Hz, 2H), 7.46-7.32 (m, 4H), 7.27-7.22 (m, 3H), 7.14 (d,  $J = 7.2$  Hz, 1H), 2.48 (s, 3H).  $^{13}\text{C NMR}$  (100 MHz,  $\text{CDCl}_3$ ):  $\delta$  168.2, 138.0, 136.4, 131.3, 130.3, 129.1, 126.6, 125.9, 124.6, 119.9, 19.8. HRMS (ESI-TOF)  $m/z$ :  $[\text{M} + \text{H}]^+$  Calcd for  $\text{C}_{14}\text{H}_{14}\text{NO}$

212.1075; Found 212.1081

**3-methyl-*N*-phenylbenzamide (4o)<sup>2</sup>**

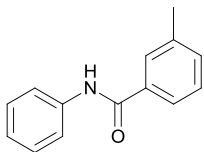

Pale yellow solid. 38 mg, 72% yield. <sup>1</sup>H NMR (400 MHz, CDCl<sub>3</sub>): δ 7.85 (bs, 1H), 7.69-7.63 (m, 3H), 7.39-7.35 (m, 5H), 7.15 (t, *J* = 7.2 Hz, 1H), 2.42 (s, 3H). <sup>13</sup>C NMR (100 MHz, CDCl<sub>3</sub>): δ 165.9, 138.7, 138.3, 135.0, 132.6, 129.1, 128.7, 127.8, 124.5, 123.9, 120.2, 21.4. HRMS (ESI-TOF) *m/z*: [M + H]<sup>+</sup> Calcd for C<sub>14</sub>H<sub>14</sub>NO 212.1075; Found 212.1079

**4-methyl-*N*-phenylbenzamide (4p)<sup>2</sup>**

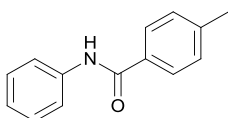

White solid. 36 mg, 68% yield. <sup>1</sup>H NMR (400 MHz, CDCl<sub>3</sub>): δ 7.84 (s, 1H), 7.76 (d, *J* = 8.0 Hz, 2H), 7.64 (d, *J* = 7.6 Hz, 2H), 7.36 (t, *J* = 8.0 Hz, 2H), 7.29-7.26 (m, 2H), 7.14 (t, *J* = 7.6 Hz, 1H), 2.42 (s, 3H). <sup>13</sup>C NMR (100 MHz, CDCl<sub>3</sub>): δ 165.6, 142.4, 138.0, 132.1, 129.4, 129.1, 127.0, 124.4, 120.2, 21.5. HRMS (ESI-TOF) *m/z*: [M + Na]<sup>+</sup> Calcd for C<sub>14</sub>H<sub>13</sub>NNaO 234.0895; Found 234.0893

**2-methoxy-*N*-phenylbenzamide (4q)<sup>5</sup>**

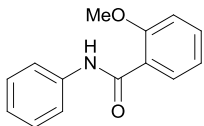

White solid. 26 mg, 46% yield. <sup>1</sup>H NMR (400 MHz, CDCl<sub>3</sub>): δ 9.81 (s, 1H), 8.31-8.27 (m, 1H), 7.68 (d, *J* = 8.0 Hz, 2H), 7.50-7.47 (m, 1H), 7.36 (t, *J* = 8.0 Hz, 2H), 7.16-7.12 (m, 2H), 7.03 (d, *J* = 8.0 Hz, 1H), 4.05 (s, 3H). <sup>13</sup>C NMR (100 MHz, CDCl<sub>3</sub>): δ 163.2, 157.2, 138.4, 133.3, 132.5, 129.0, 124.2, 121.7, 120.4, 111.5, 56.2. HRMS (ESI-TOF) *m/z*: [M + H]<sup>+</sup> Calcd for C<sub>14</sub>H<sub>14</sub>NO<sub>2</sub> 228.1025; Found 228.1022

**3-methoxy-*N*-phenylbenzamide (4r)<sup>2</sup>**

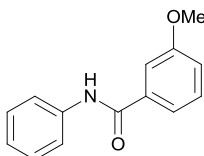

White solid. 36 mg, 64% yield. <sup>1</sup>H NMR (400 MHz, CDCl<sub>3</sub>): δ 7.87 (s, 1H), 7.64 (d, *J* = 8.0 Hz, 2H), 7.44 (s, 1H), 7.40-7.35 (m, 4H), 7.15 (t, *J* = 7.6 Hz, 1H), 7.09-7.07 (m, 1H), 3.86 (s, 3H). <sup>13</sup>C NMR (100 MHz, CDCl<sub>3</sub>): δ 165.6, 159.9, 137.9, 136.5, 129.8, 129.1, 124.6, 120.2, 118.7, 118.0, 112.5, 55.5. HRMS (ESI-TOF) *m/z*: [M + H]<sup>+</sup> Calcd for C<sub>14</sub>H<sub>14</sub>NO<sub>2</sub> 228.1025; Found 228.1022

**4-methoxy-*N*-phenylbenzamide (4s)<sup>2</sup>**

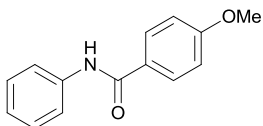

White soild. 38 mg, 66% yield.  $^1\text{H}$  NMR (400 MHz,  $\text{CDCl}_3$ ):  $\delta$  7.84 (d,  $J = 8.8$  Hz, 2H), 7.80 (s, 1H), 7.63 (d,  $J = 7.6$  Hz, 2H), 7.36 (t,  $J = 7.6$  Hz, 2H), 7.13 (t,  $J = 7.6$  Hz, 1H), 6.97 (d,  $J = 8.8$  Hz, 2H), 3.87 (s, 3H).  $^{13}\text{C}$  NMR (100 MHz,  $\text{CDCl}_3$ ):  $\delta$  165.2, 162.5, 138.1, 129.1, 129.0, 127.1, 124.3, 120.1, 114.0, 55.5. HRMS (ESI-TOF)  $m/z$ :  $[\text{M} + \text{H}]^+$  Calcd for  $\text{C}_{14}\text{H}_{14}\text{NO}_2$  228.1025; Found 228.1029

#### 4-(dimethylamino)-*N*-phenylbenzamide (4t)<sup>5</sup>

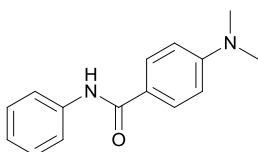

White soild. 25 mg, 43% yield.  $^1\text{H}$  NMR (400 MHz,  $\text{CDCl}_3$ ):  $\delta$  7.78 (d,  $J = 8.8$  Hz, 2H), 7.73 (s, 1H), 7.63 (d,  $J = 7.6$  Hz, 2H), 7.35 (t,  $J = 7.6$  Hz, 2H), 7.25-7.23 (m, 2H), 7.13-7.08 (m, 1H), 3.05 (s, 6H).  $^{13}\text{C}$  NMR (100 MHz,  $\text{CDCl}_3$ ):  $\delta$  165.6, 153.8, 138.5, 132.0, 131.4, 129.0, 128.6, 124.5, 123.9, 111.2, 40.1. HRMS (ESI-TOF)  $m/z$ :  $[\text{M} + \text{H}]^+$  Calcd for  $\text{C}_{15}\text{H}_{17}\text{N}_2\text{O}$  241.1341; Found 241.1346

#### 4-fluoro-*N*-phenylbenzamide (4u)<sup>3</sup>

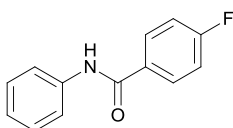

Pale yellow soild. 22 mg, 41% yield.  $^1\text{H}$  NMR (400 MHz,  $\text{CDCl}_3$ ):  $\delta$  7.91-7.87 (m, 2H), 7.77 (s, 1H), 7.62 (d,  $J = 8.0$  Hz, 2H), 7.38 (t,  $J = 8.0$  Hz, 2H), 7.17 (t,  $J = 8.4$  Hz, 3H).  $^{13}\text{C}$  NMR (100 MHz,  $\text{CDCl}_3$ ):  $\delta$  166.2, 164.7, 163.7, 137.7, 131.2, 130.5 ( $J = 2.1$  Hz), 129.4 ( $J = 8.9$  Hz), 129.2, 124.7, 120.2, 115.9 ( $J = 21.8$  Hz). HRMS (ESI-TOF)  $m/z$ :  $[\text{M} + \text{H}]^+$  Calcd for  $\text{C}_{13}\text{H}_{11}\text{FNO}$  216.0825; Found 216.0819

#### 4-chloro-*N*-phenylbenzamide (4v)<sup>2</sup>

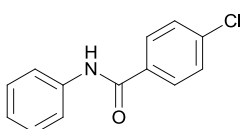

White soild. 31 mg, 53% yield.  $^1\text{H}$  NMR (400 MHz,  $\text{CDCl}_3$ ):  $\delta$  7.82 (d,  $J = 8.4$  Hz, 2H), 7.77 (s, 1H), 7.63 (d,  $J = 8.0$  Hz, 2H), 7.47 (d,  $J = 8.4$  Hz, 2H), 7.38 (t,  $J = 8.0$  Hz, 2H), 7.17 (t,  $J = 7.6$  Hz, 1H).  $^{13}\text{C}$  NMR (100 MHz,  $\text{CDCl}_3$ ):  $\delta$  164.6, 138.2, 137.6, 133.3, 129.2, 129.1, 128.5, 124.8, 120.2. HRMS (ESI-TOF)  $m/z$ :  $[\text{M} + \text{H}]^+$  Calcd for  $\text{C}_{13}\text{H}_{11}\text{ClNO}$  232.0529; Found 232.0531

#### 4-bromo-*N*-phenylbenzamide (4w)<sup>2</sup>

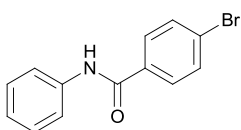



White soild. 27 mg, 39% yield.  $^1\text{H}$  NMR (400 MHz,  $\text{CDCl}_3$ ):  $\delta$  7.75 (d,  $J = 8.8$  Hz, 2H), 7.65-7.61 (m, 4H), 7.38 (t,  $J = 7.6$  Hz, 2H), 7.17 (t,  $J = 7.6$  Hz, 1H).  $^{13}\text{C}$  NMR (100 MHz,  $\text{CDCl}_3$ ):  $\delta$  163.7, 136.6, 132.8, 131.0, 128.1, 127.6, 125.6, 123.8, 119.2. HRMS (ESI-TOF)  $m/z$ :  $[\text{M} + \text{Na}]^+$  Calcd for  $\text{C}_{13}\text{H}_{10}\text{BrNNaO}$  297.9843; Found 297.9829

### 3-fluoro-*N*-phenylbenzamide (4x)<sup>2</sup>

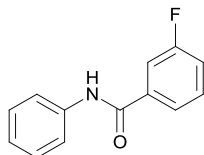

White soild. 42 mg, 79% yield.  $^1\text{H}$  NMR (400 MHz,  $\text{CDCl}_3$ ):  $\delta$  7.85 (bs, 1H), 7.65-7.57 (m, 4H), 7.49-7.43 (m, 1H), 7.40-7.35 (m, 2H), 7.28-7.22 (m, 1H), 7.17 (t,  $J = 7.6$  Hz, 1H).  $^{13}\text{C}$  NMR (100 MHz,  $\text{CDCl}_3$ ):  $\delta$  164.4, 164.1, 161.6, 137.6, 137.2 ( $J = 6.8$  Hz), 130.5 ( $J = 7.9$  Hz), 129.2, 124.9, 122.4, 120.3, 118.9 ( $J = 21.1$  Hz), 114.6 ( $J = 22.9$  Hz). HRMS (ESI-TOF)  $m/z$ :  $[\text{M} + \text{H}]^+$  Calcd for  $\text{C}_{13}\text{H}_{11}\text{FNO}$  216.0825; Found 216.0831

### 4-nitro-*N*-phenylbenzamide (4y)<sup>5</sup>

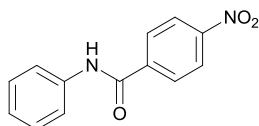

White soild. 24 mg, 40% yield.  $^1\text{H}$  NMR (400 MHz,  $\text{CDCl}_3$ ):  $\delta$  7.99 (d,  $J = 8.4$  Hz, 2H), 7.82 (s, 1H), 7.77 (d,  $J = 8.0$  Hz, 2H), 7.65 (d,  $J = 8.0$  Hz, 2H), 7.40 (t,  $J = 7.6$  Hz, 2H), 7.20 (t,  $J = 7.6$  Hz, 1H).  $^{13}\text{C}$  NMR (100 MHz,  $\text{CDCl}_3$ ):  $\delta$  163.2, 149.3, 140.7, 137.4, 129.2, 127.5, 125.9, 125.1, 120.3. HRMS (ESI-TOF)  $m/z$ :  $[\text{M} - \text{H}]^-$  Calcd for  $\text{C}_{13}\text{H}_9\text{N}_2\text{O}_3$  241.0613; Found 241.0591

### *N*-phenyl-4-(trifluoromethyl)benzamide (4z)<sup>6</sup>

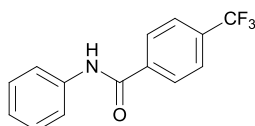

White soild. 28 mg, 43% yield.  $^1\text{H}$  NMR (400 MHz,  $\text{CDCl}_3$ ):  $\delta$  8.36 (d,  $J = 8.4$  Hz, 2H), 8.05 (d,  $J = 8.8$  Hz, 2H), 7.82 (s, 1H), 7.64 (d,  $J = 8.0$  Hz, 2H), 7.41 (t,  $J = 8.0$  Hz, 2H), 7.21 (t,  $J = 8.4$  Hz, 1H).  $^{13}\text{C}$  NMR (100 MHz,  $\text{CDCl}_3$ ):  $\delta$  164.3, 139.2, 133.5, 131.5, 128.3, 127.2, 124.3, 123.7, 123.0, 120.5. HRMS (ESI-TOF)  $m/z$ :  $[\text{M} - \text{H}]^-$  Calcd for  $\text{C}_{14}\text{H}_9\text{F}_3\text{NO}$  264.0636; Found 264.0615

### 4-cyano-*N*-phenylbenzamide (4aa)<sup>7</sup>

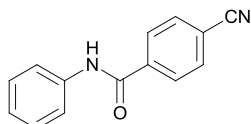

White soild. 21 mg, 38% yield.  $^1\text{H}$  NMR (400 MHz,  $\text{CDCl}_3$ ):  $\delta$  7.97 (d,  $J = 8.4$  Hz, 2H), 7.91 (s, 1H), 7.78 (d,  $J = 8.4$  Hz, 2H), 7.63 (d,  $J = 8.0$  Hz, 2H), 7.39 (t,  $J = 7.6$  Hz, 2H), 7.20 (t,  $J = 7.6$  Hz, 1H).  $^{13}\text{C}$  NMR (100 MHz,  $\text{CDCl}_3$ ):  $\delta$  163.9, 138.9, 137.3, 132.6, 129.2, 127.8, 125.3, 120.4, 117.9, 115.4. HRMS (ESI-TOF)  $m/z$ :  $[\text{M} + \text{H}]^+$  Calcd for  $\text{C}_{14}\text{H}_{11}\text{N}_2\text{O}$  223.0871; Found 223.0876

***N*-phenyl-2-(trifluoromethyl)benzamide (4ab)<sup>2</sup>**

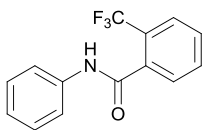

White solid. 28 mg, 43% yield. <sup>1</sup>H NMR (400 MHz, CDCl<sub>3</sub>): δ 7.75 (d, *J* = 7.6 Hz, 1H), 7.67-7.56 (m, 5H), 7.51 (s, 1H), 7.38 (t, *J* = 7.6 Hz, 2H), 7.19 (t, *J* = 7.6 Hz, 1H). <sup>13</sup>C NMR (100 MHz, CDCl<sub>3</sub>): δ 165.7, 137.4, 135.8, 132.2, 130.9, 130.2, 129.2, 128.6, 126.5 (*J* = 4.9 Hz), 125.1, 120.3. HRMS (ESI-TOF) *m/z*: [M + Na]<sup>+</sup> Calcd for C<sub>14</sub>H<sub>10</sub>F<sub>3</sub>NNaO 288.0612; Found 288.0605

***N*-phenylcyclohexanecarboxamide (4ac)<sup>8</sup>**

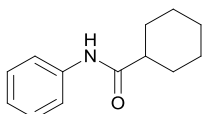

White solid. 17 mg, 34% yield. <sup>1</sup>H NMR (400 MHz, CDCl<sub>3</sub>): δ 7.52 (d, *J* = 8.0 Hz, 2H), 7.31 (t, *J* = 8.0 Hz, 2H), 7.09 (t, *J* = 7.6 Hz, 1H), 2.27-2.20 (m, 1H), 1.85-1.65 (m, 5H), 1.57-1.43 (m, 5H). <sup>13</sup>C NMR (100 MHz, CDCl<sub>3</sub>): δ 174.5, 138.1, 128.9, 124.1, 119.8, 46.6, 29.7, 25.7, 25.3. HRMS (ESI-TOF) *m/z*: [M + H]<sup>+</sup> Calcd for C<sub>13</sub>H<sub>18</sub>NO 204.1388; Found 204.1386

***N*-phenylfuran-2-carboxamide (4ad)<sup>9</sup>**

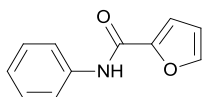

Brown solid. 18 mg, 38% yield. <sup>1</sup>H NMR (400 MHz, CDCl<sub>3</sub>): δ 8.08 (s, 1H), 7.66 (d, *J* = 7.6 Hz, 2H), 7.52 (s, 1H), 7.37 (t, *J* = 7.6 Hz, 2H), 7.26-7.24 (m, 1H), 7.15 (t, *J* = 7.6 Hz, 1H), 6.58-6.56 (m, 1H). <sup>13</sup>C NMR (100 MHz, CDCl<sub>3</sub>): δ 155.0, 146.8, 143.1, 136.3, 128.1, 123.5, 118.9, 114.3, 111.6. HRMS (ESI-TOF) *m/z*: [M + H]<sup>+</sup> Calcd for C<sub>11</sub>H<sub>10</sub>NO<sub>2</sub> 188.0712; Found 188.0719

***N*-phenylbutyramide (4ae)<sup>9</sup>**

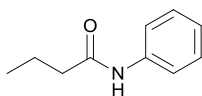

White solid. 19 mg, 47% yield. <sup>1</sup>H NMR (400 MHz, CDCl<sub>3</sub>): δ 7.52 (d, *J* = 8.0 Hz, 2H), 7.46 (s, 1H), 7.30 (t, *J* = 7.6 Hz, 2H), 7.09 (t, *J* = 7.6 Hz, 1H), 2.33 (t, *J* = 7.6 Hz, 2H), 1.79-1.72 (m, 2H), 0.99 (t, *J* = 7.6 Hz, 3H). <sup>13</sup>C NMR (100 MHz, CDCl<sub>3</sub>): δ 171.5, 137.9, 128.9, 124.2, 119.9, 39.7, 19.1, 13.8. HRMS (ESI-TOF) *m/z*: [M + H]<sup>+</sup> Calcd for C<sub>10</sub>H<sub>14</sub>NO 164.1075; Found 164.1083

**2-fluoro-*N*-phenylbenzamide (4af)<sup>2</sup>**

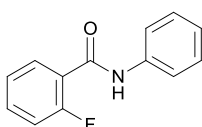

White solid. 31 mg, 57% yield. <sup>1</sup>H NMR (400 MHz, CDCl<sub>3</sub>): δ 8.47 (bs, 1H), 8.20-8.15 (m, 1H), 7.66 (d, *J* =

7.6 Hz, 2H), 7.54-7.51 (m, 1H), 7.40-7.29 (m, 3H), 7.21-7.14 (m, 2H).  $^{13}\text{C}$  NMR (100 MHz,  $\text{CDCl}_3$ ):  $\delta$  161.6, 161.3, 159.2, 137.7, 133.8 ( $J = 9.4$  Hz), 132.3, 129.1, 125.1, 124.8, 121.3 ( $J = 11.2$  Hz), 120.5, 116.1 ( $J = 24.9$  Hz). HRMS (ESI-TOF)  $m/z$ :  $[\text{M} + \text{H}]^+$  Calcd for  $\text{C}_{13}\text{H}_{11}\text{FNO}$  216.0825; Found 216.0818

### 3. References

- 1 C. Zhang and N. Jiao, *Angew. Chem.* 2010, **122**, 6310; *Angew. Chem. Int. Ed.* 2010, **49**, 6174.
- 2 B. Y. H. Tan and Y. C. Teo, *Org. Biomol. Chem.*, 2014, **12**, 7478-7481.
- 3 F. H. Xiao, Y. Liu, C. L. Tang and G. J. Deng, *Org. Lett.*, 2012, **14**, 984-987.
- 4 C. H. Zheng, H. Yang, M. Zhang, S. H. Lu and Y. J. Zhang *et.al Bioorg. Med. Chem. Lett.*, 2012, **22**, 39-44.
- 5 L. J. Zhang, S. P. Su, H. P. Wu and S. W. Wang, *Tetrahedron*, 2009, **65**, 10022–10024.
- 6 Q. Q. Wang, Y. Q. Deng and F. Shi, *Catal. Sci. Technol.*, 2014, **4**, 1710-1715.
- 7 D. A. Ockey, J. L. Dotson and T. R. Gadek *et.al Bioorg. Med. Chem.*, 2004, **12**, 37-44.
- 8 H. Z. Liu, G. Laurency, N. Yan and P. J. Dyson, *Chem. Commun.*, 2014, **50**, 341-343.
- 9 W. T. Wang, Y. Cong, L. L. Zhang, Y. Q. Huang, X. D. Wang and T. Zhang, *Tetrahedron Lett.*, 2014, **55**, 124–127.

## 4. NMR spectra

4a

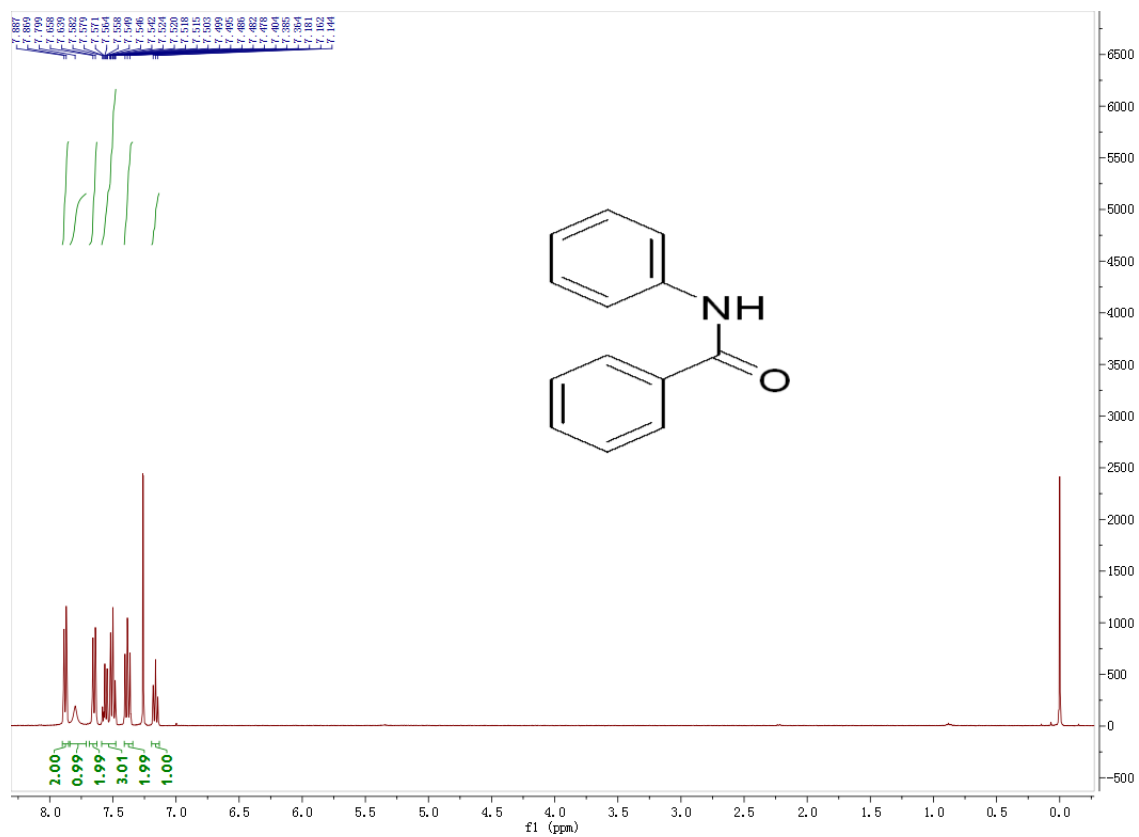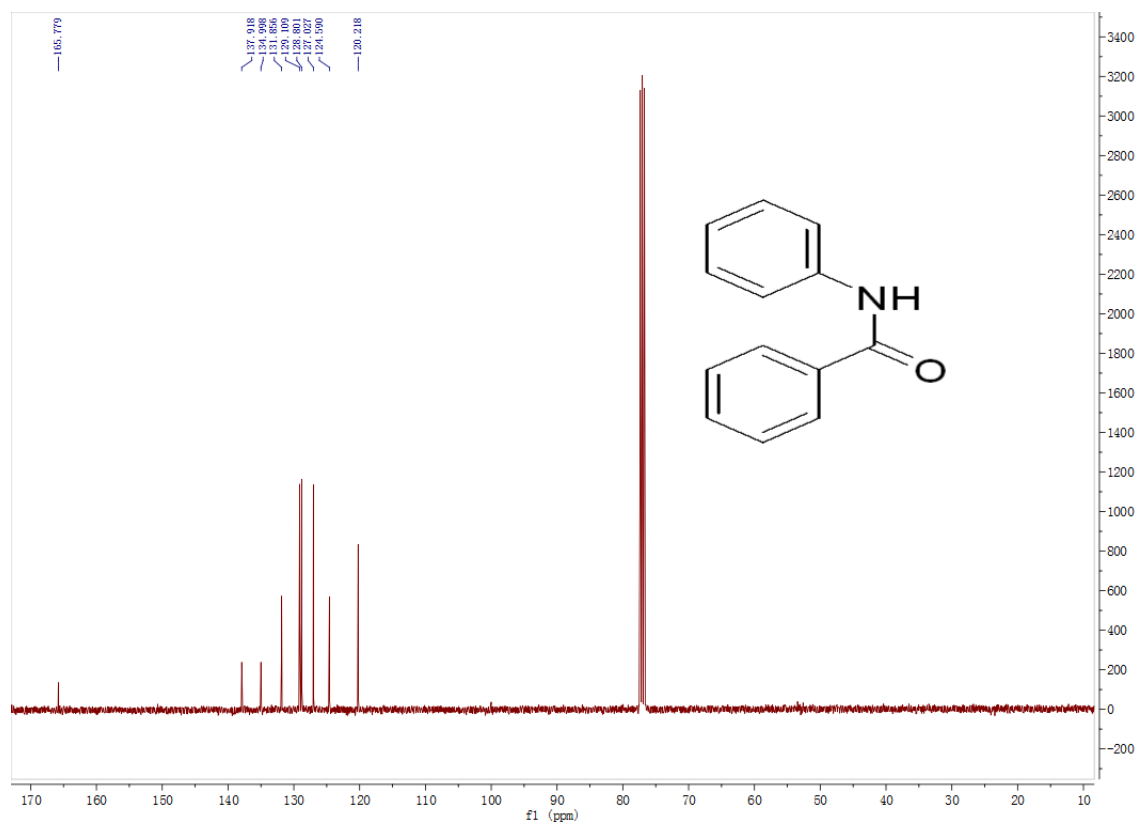

4b

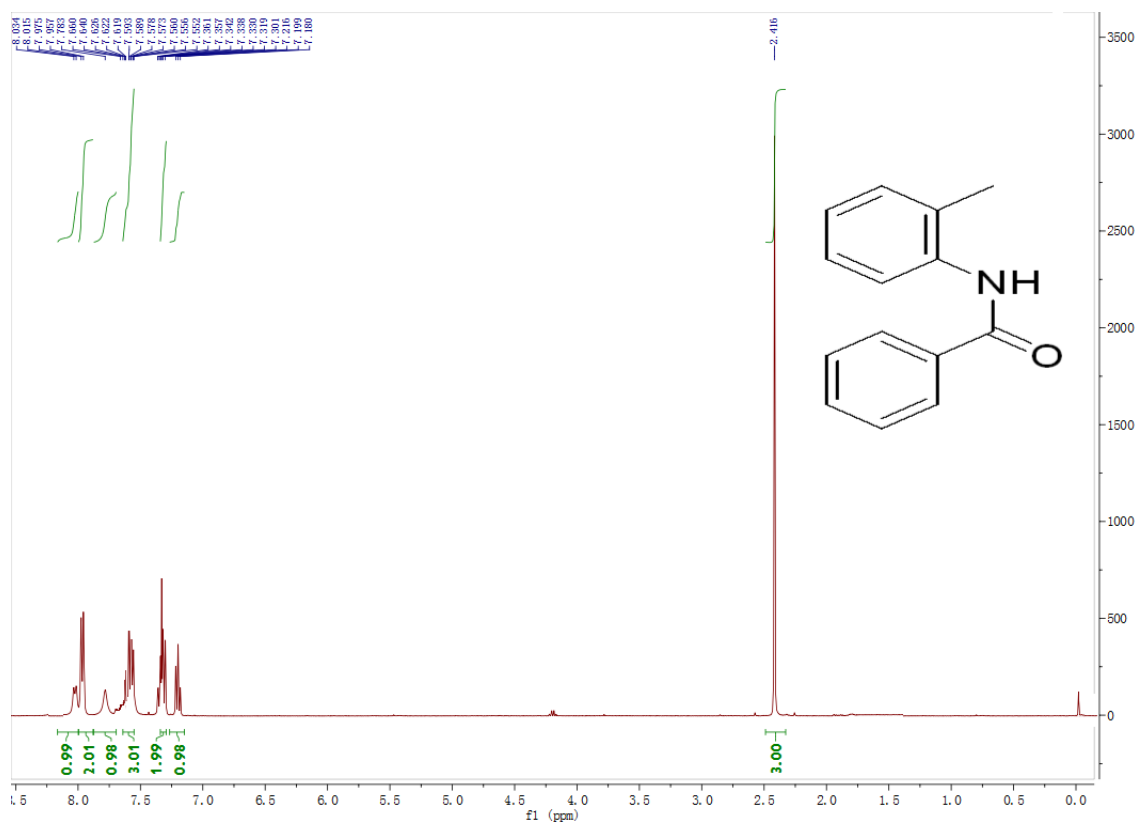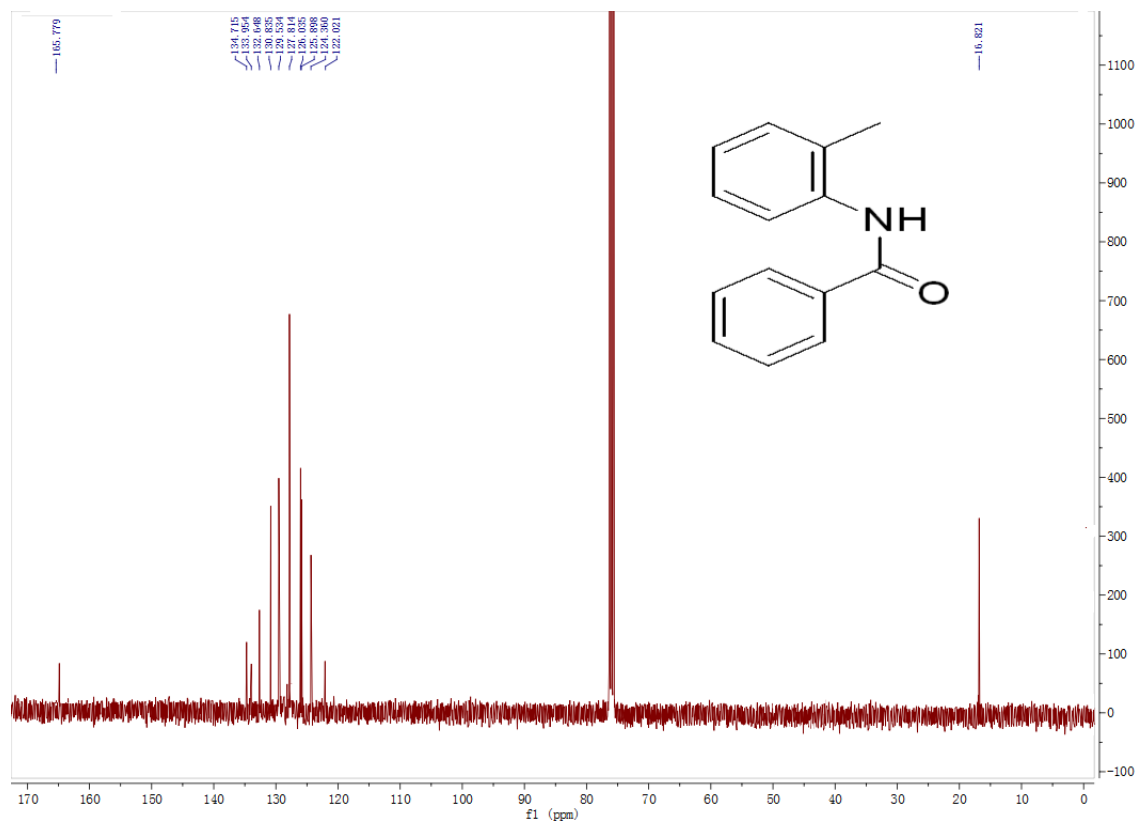

4c

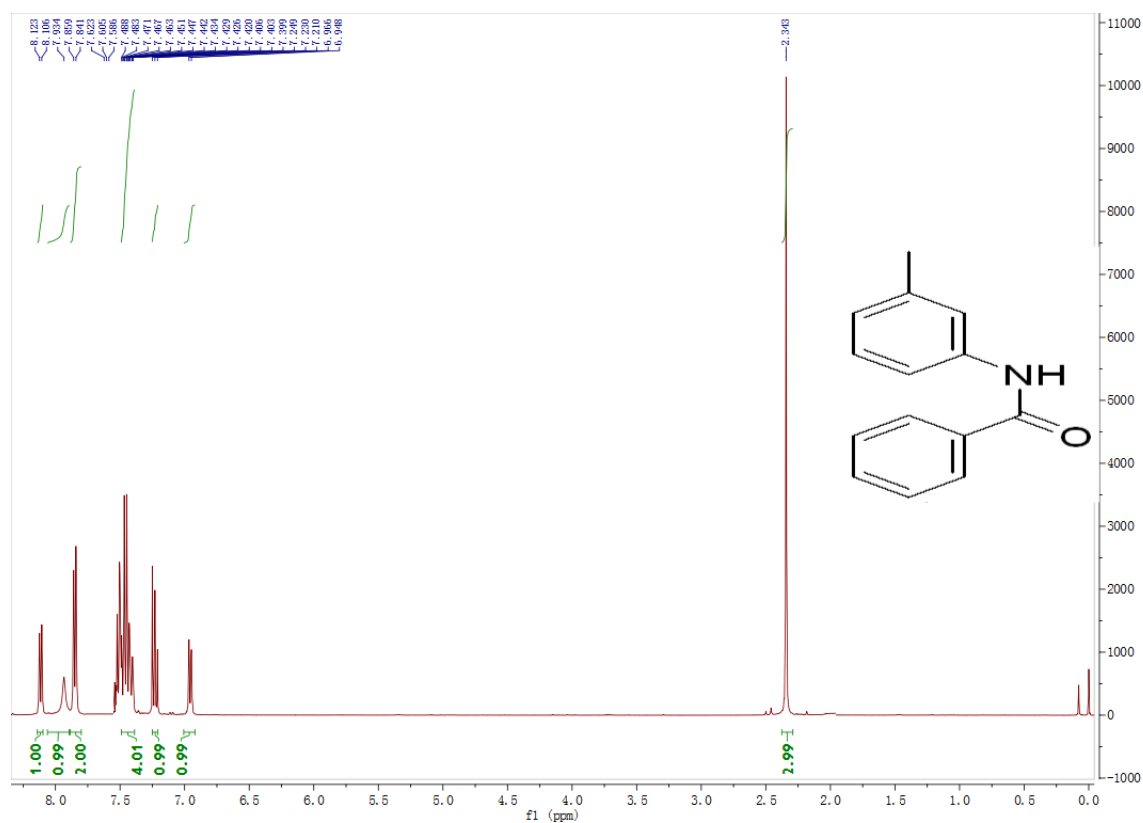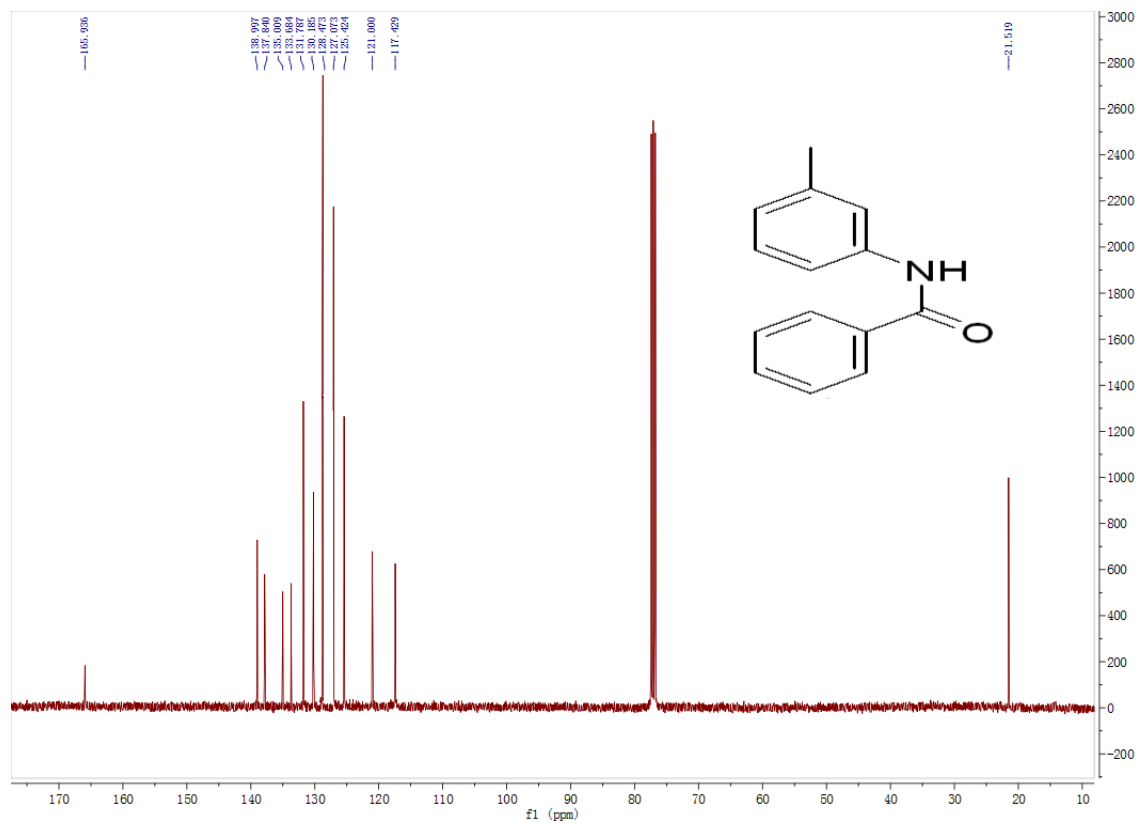

4d

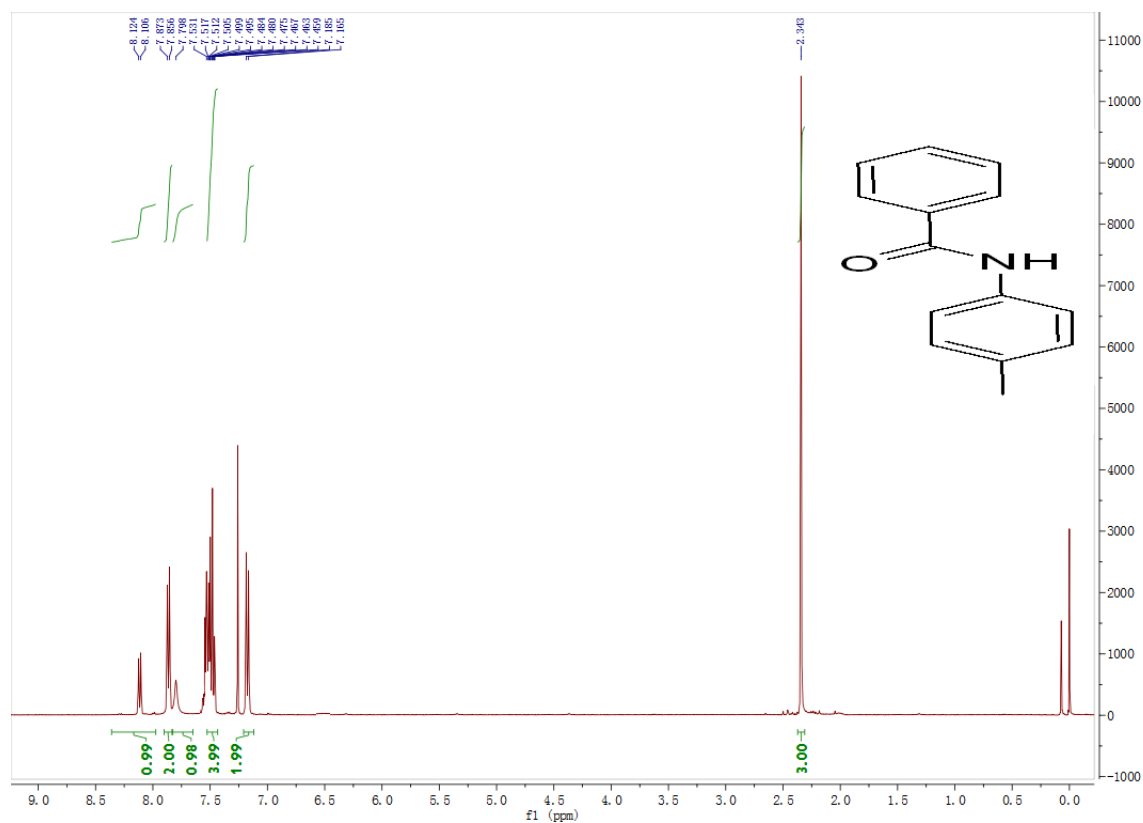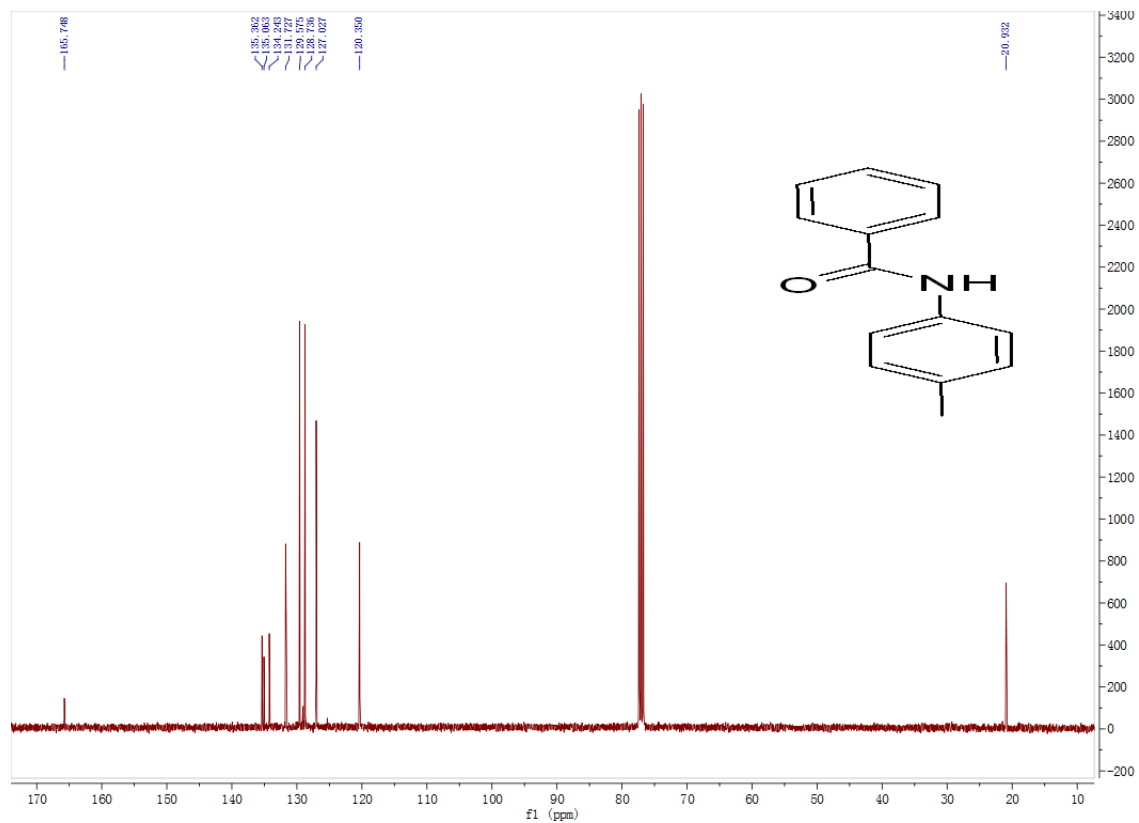



4e

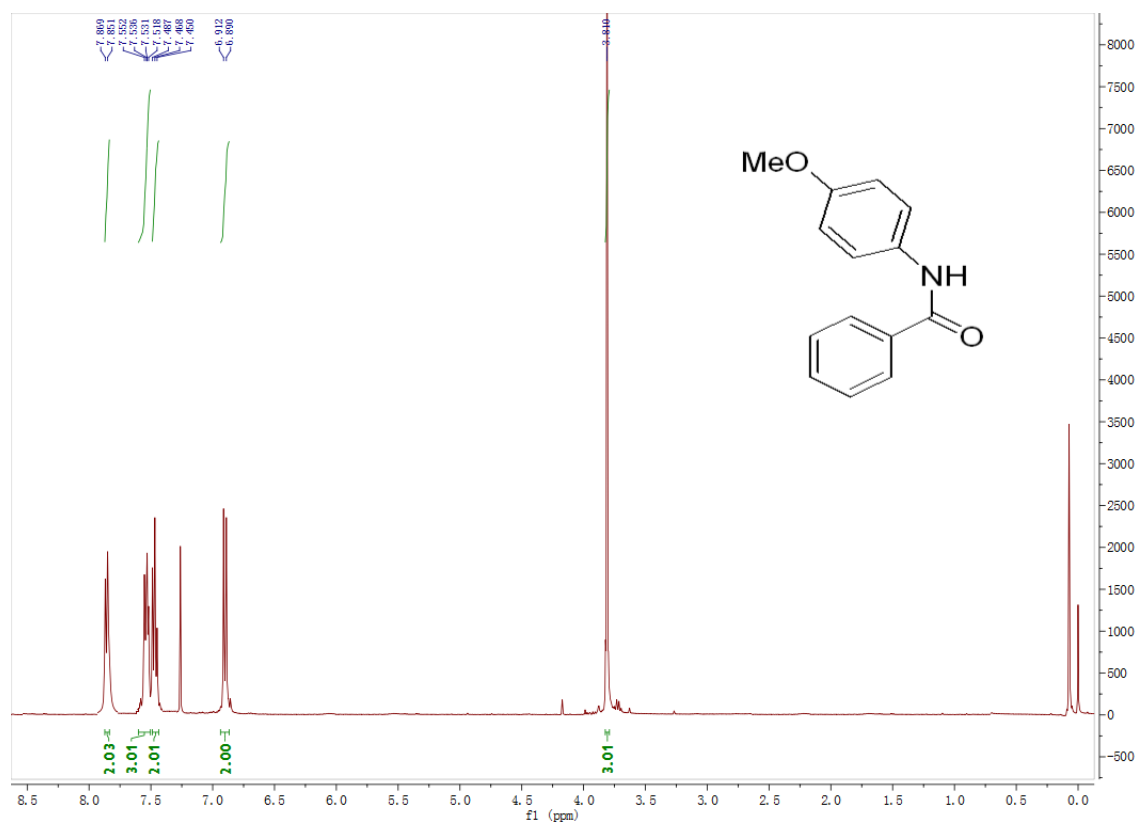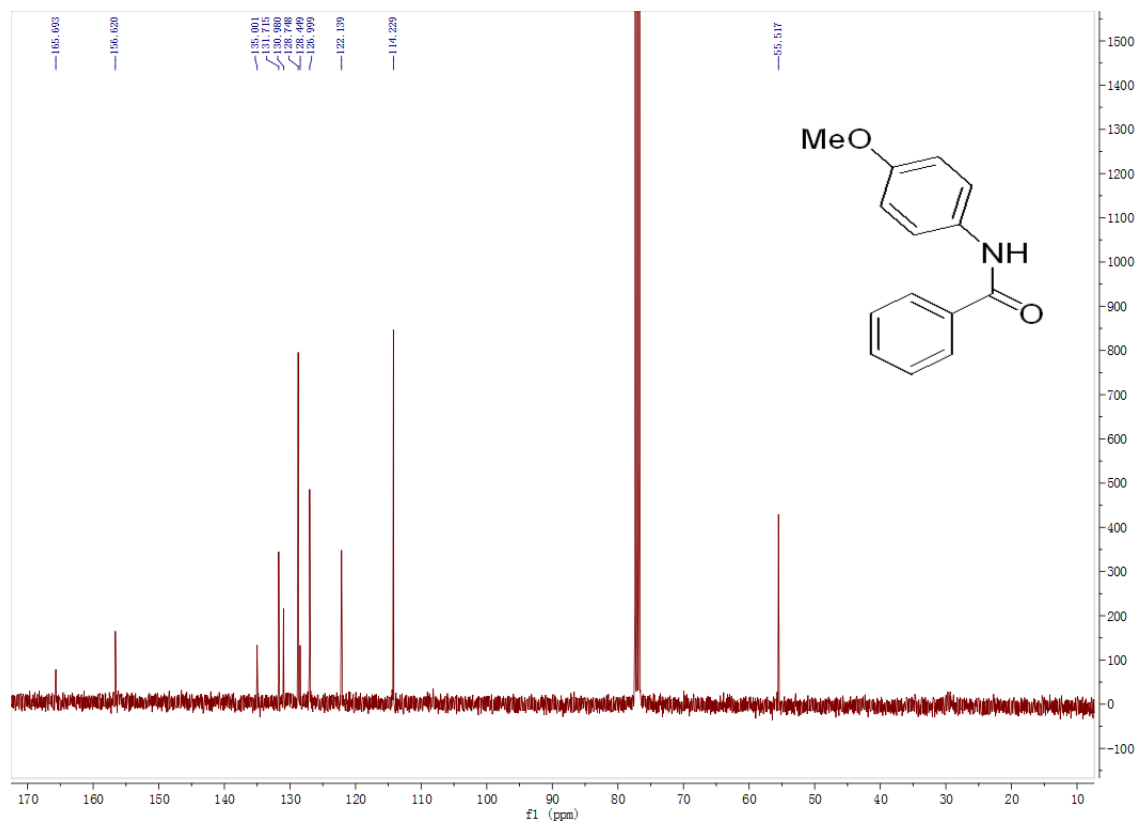

4f

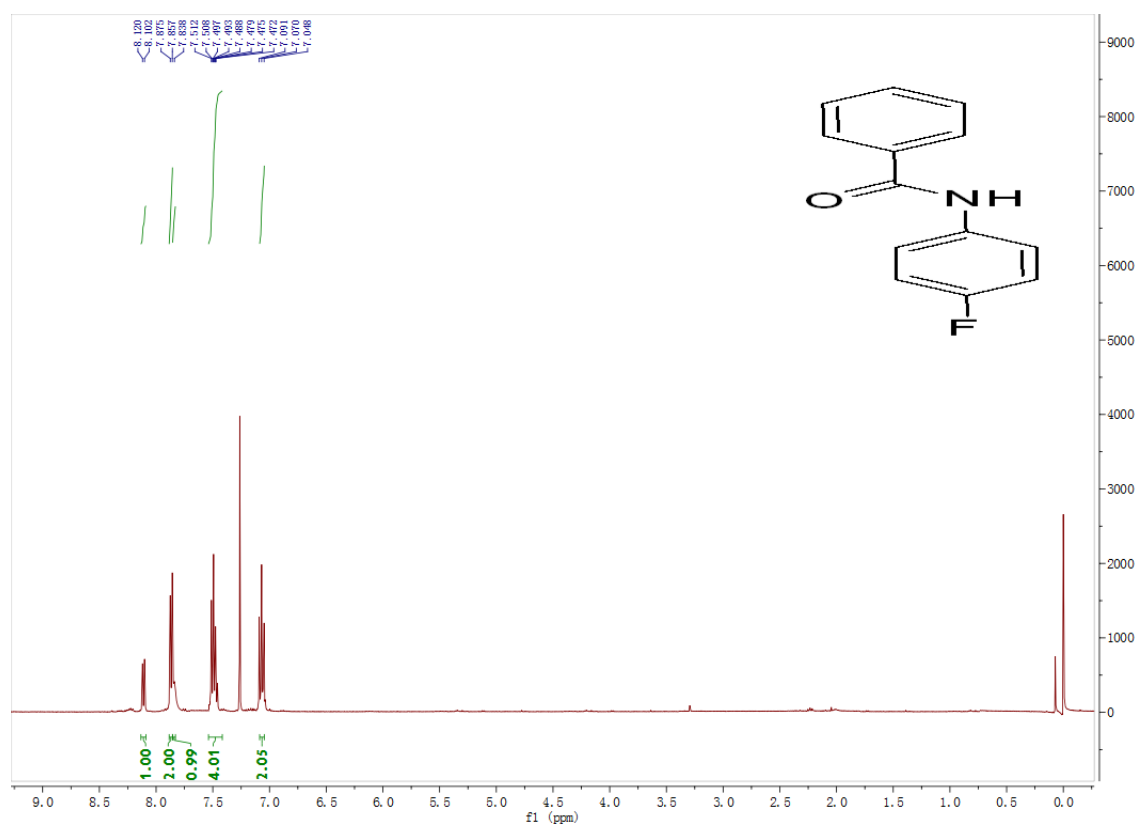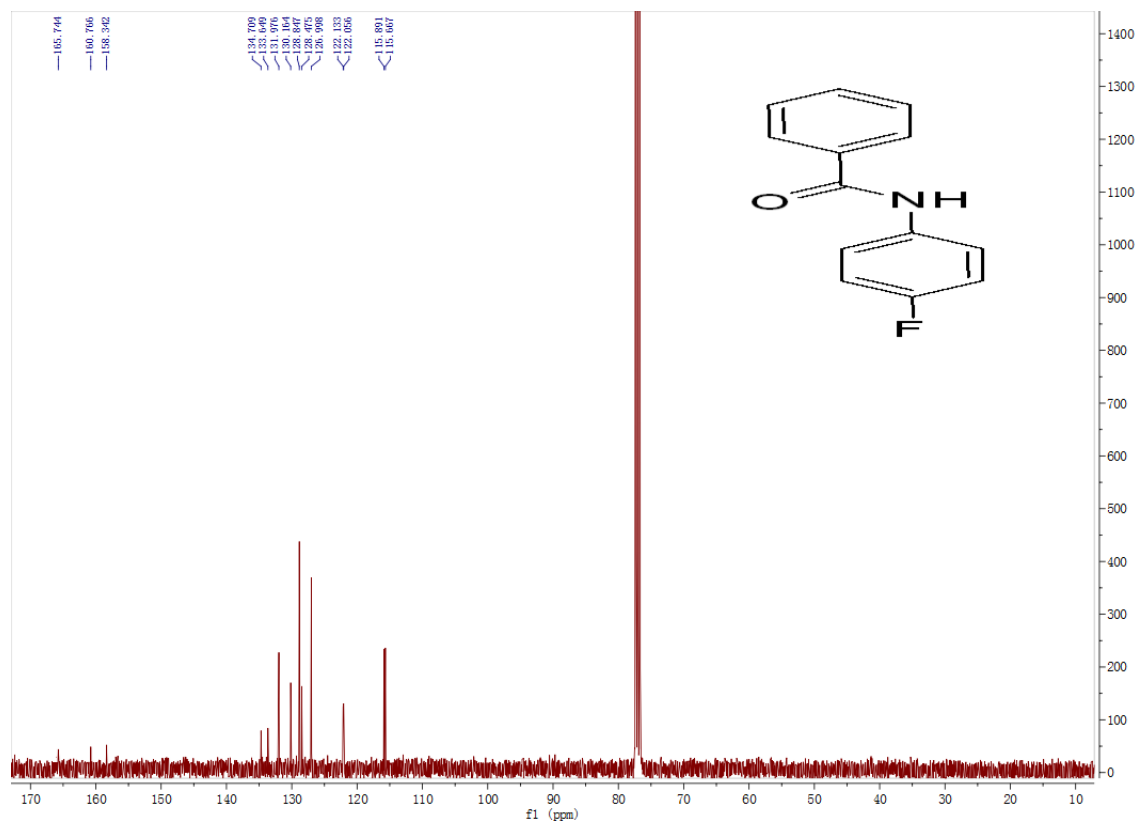

4g

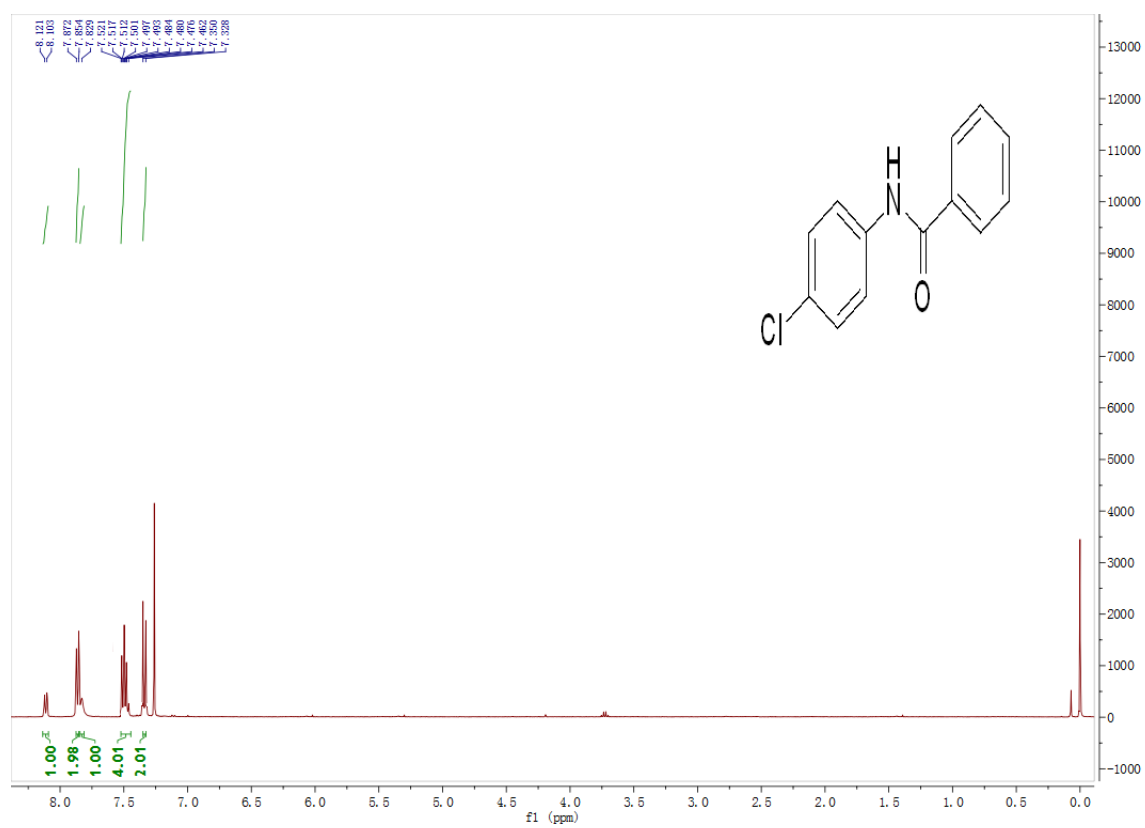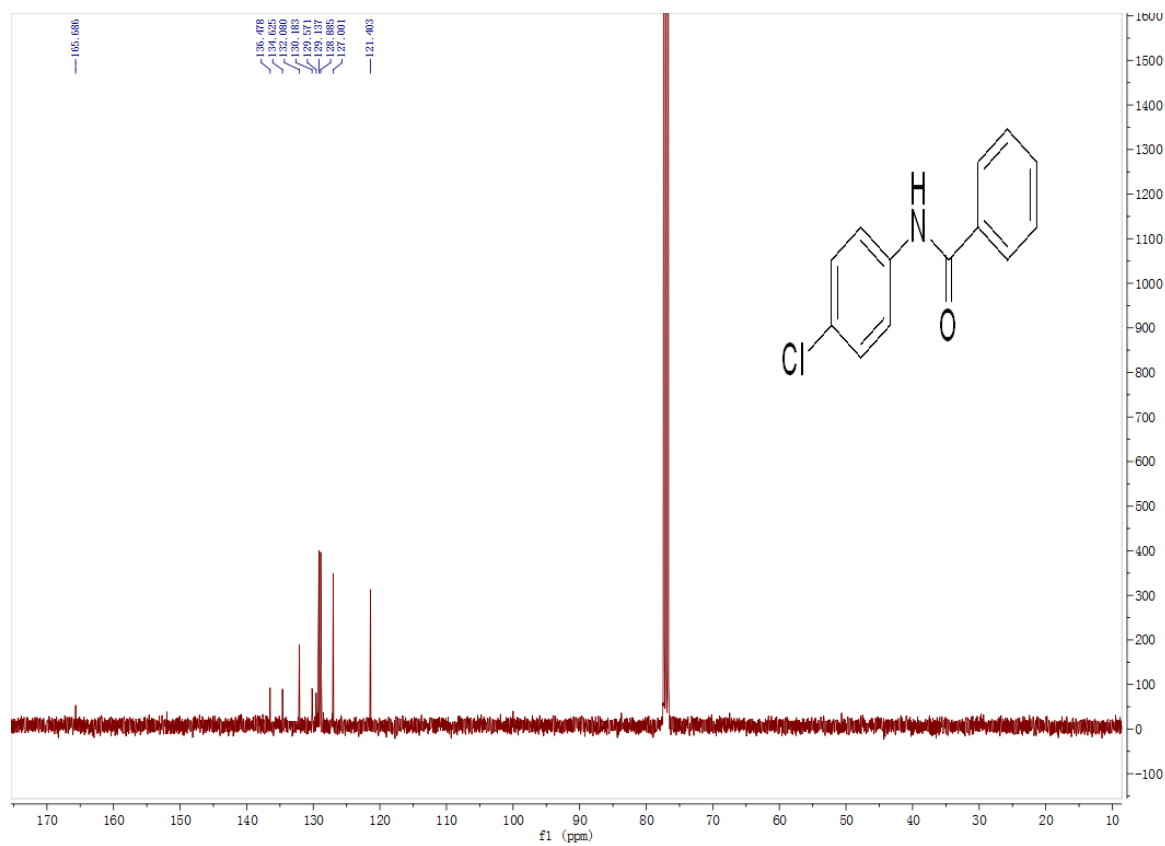

4h

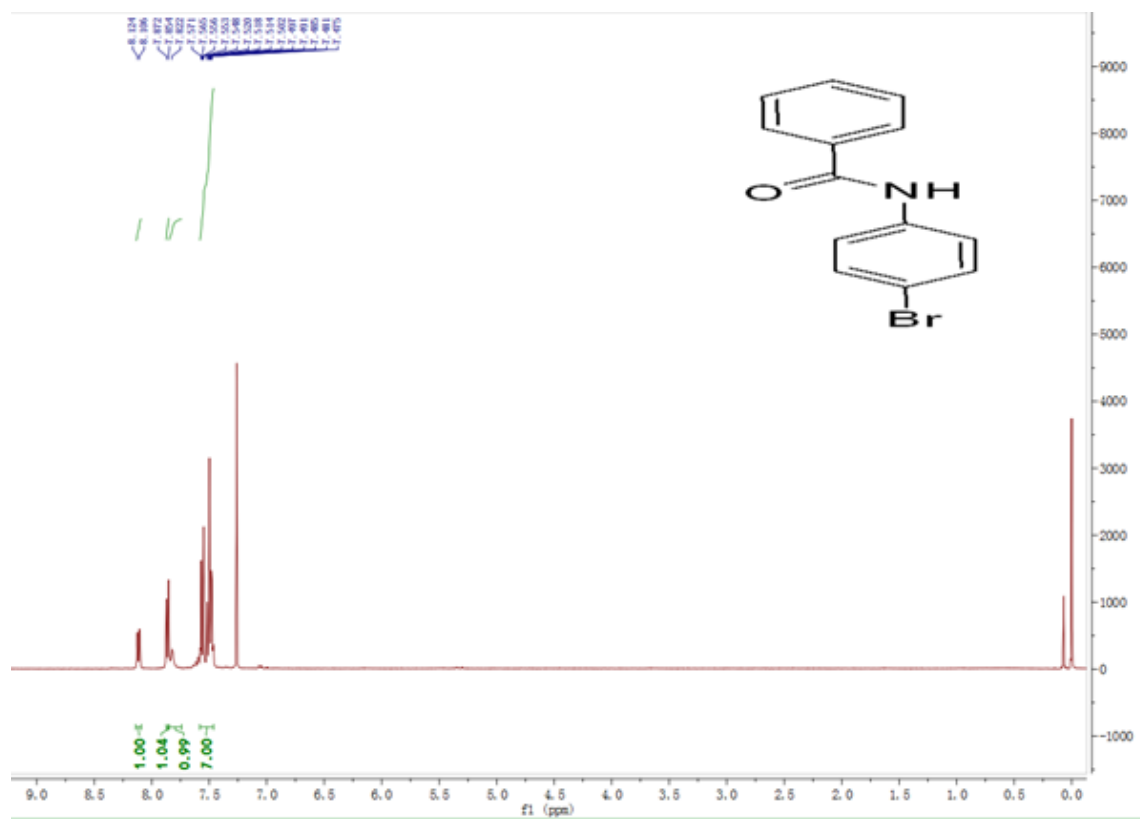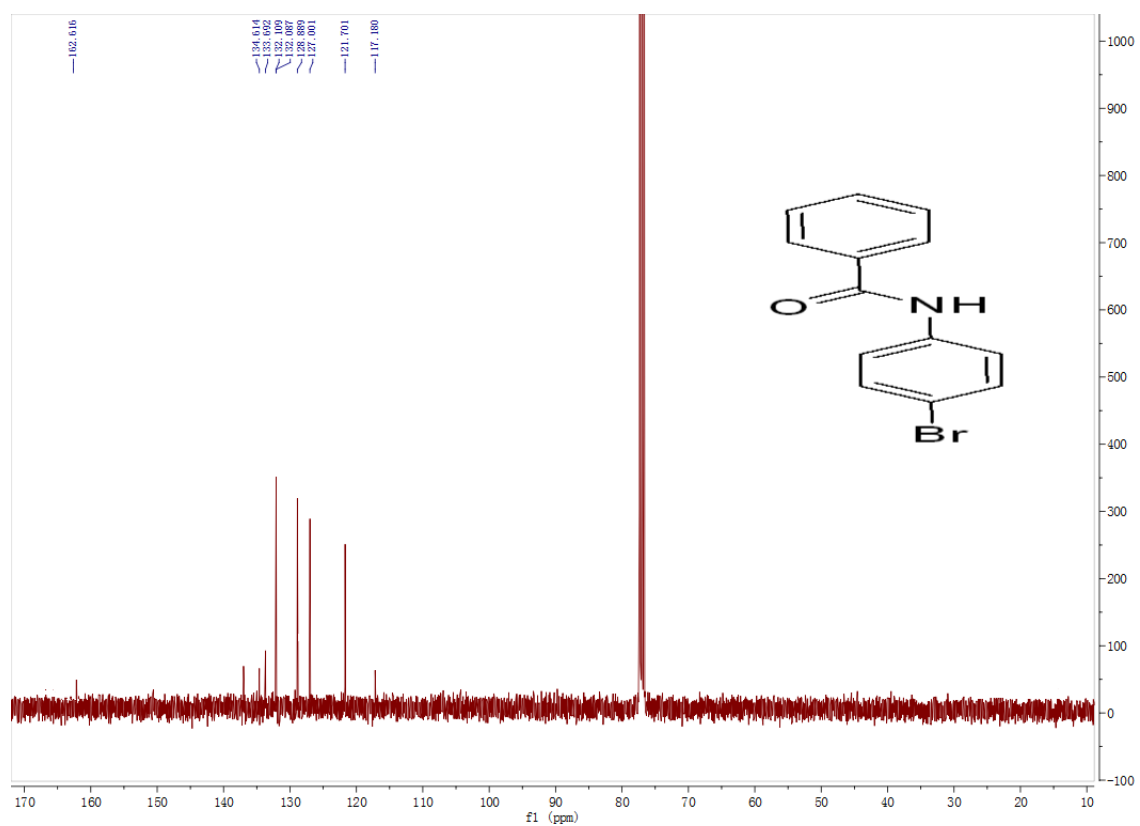

4i

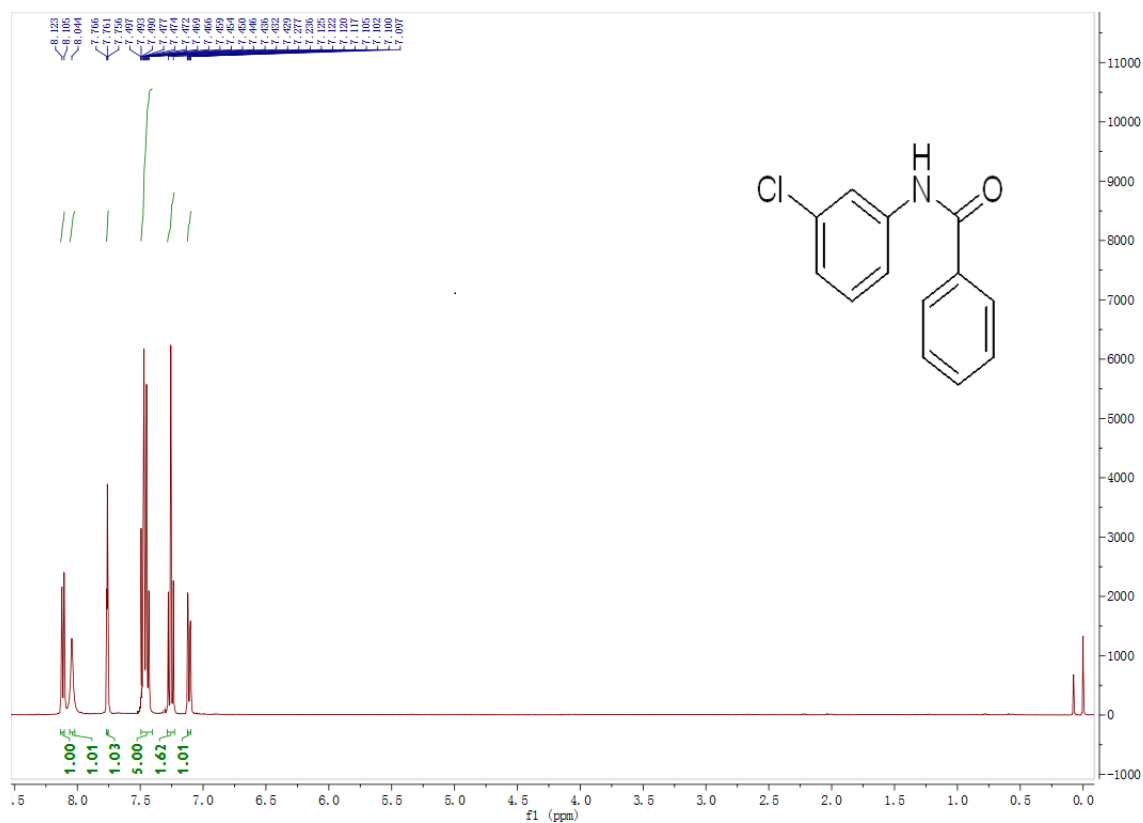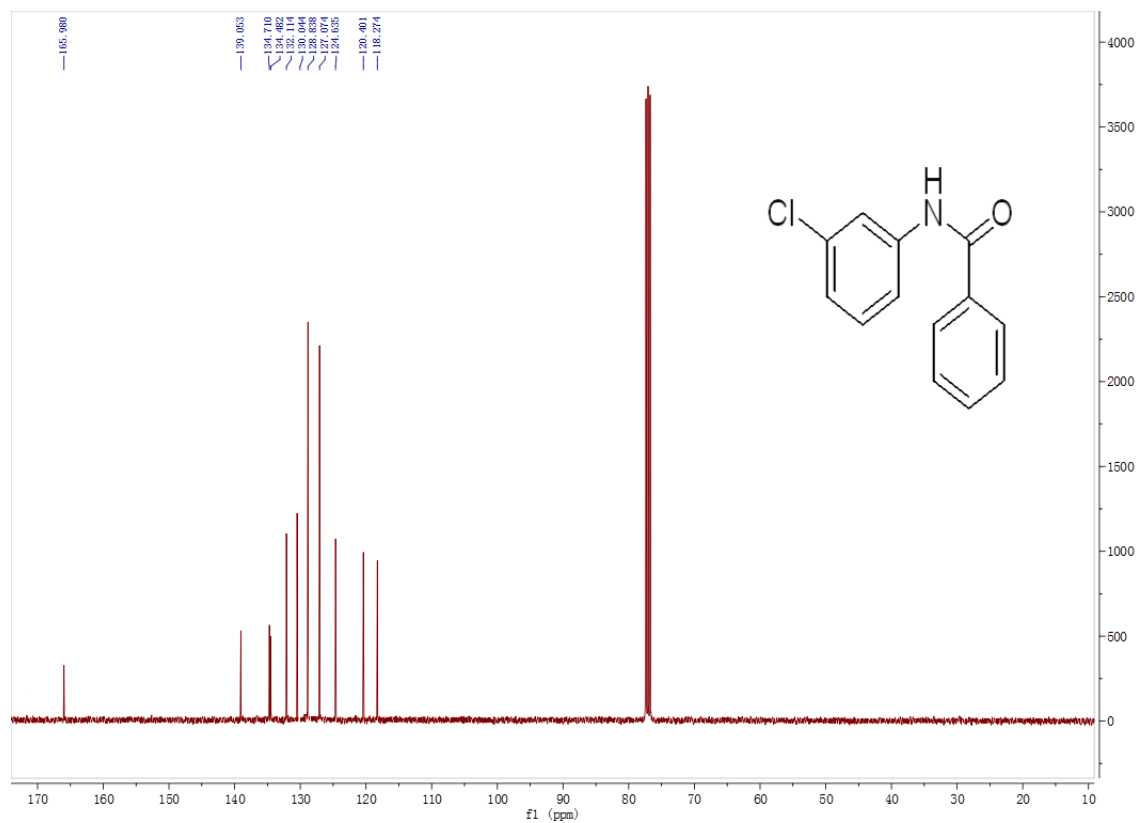

4j

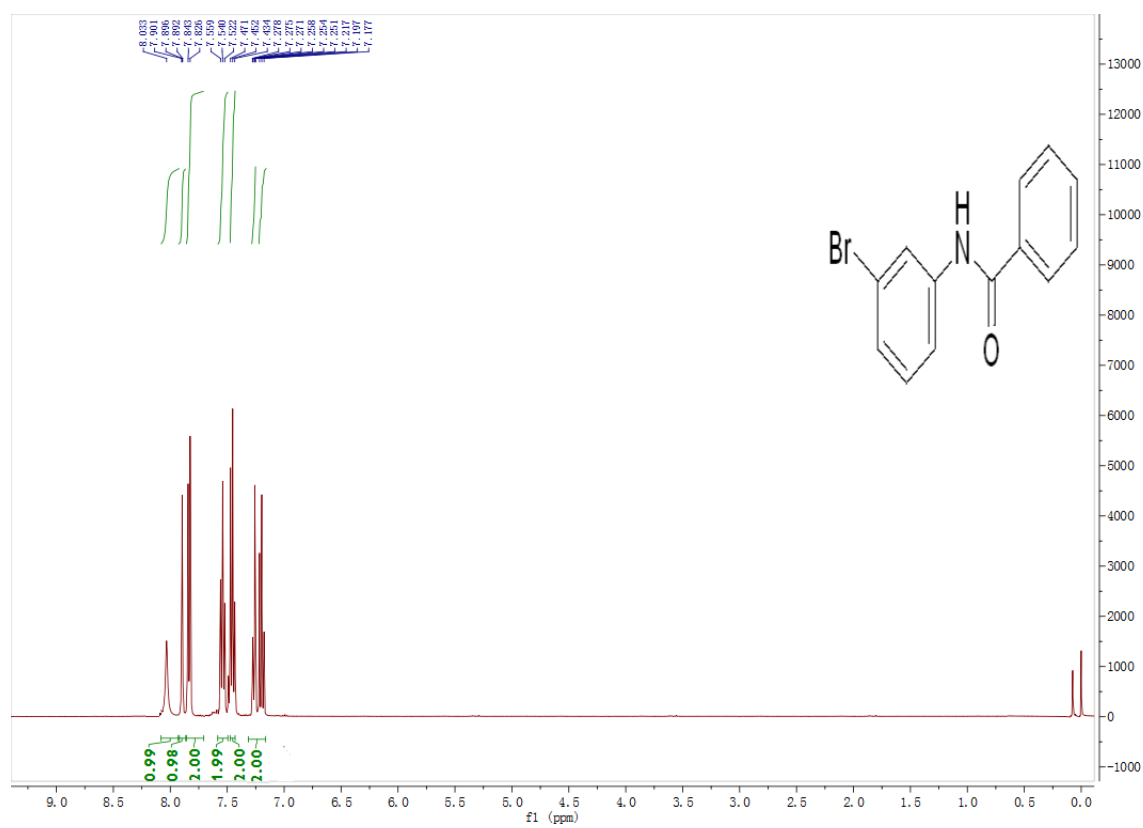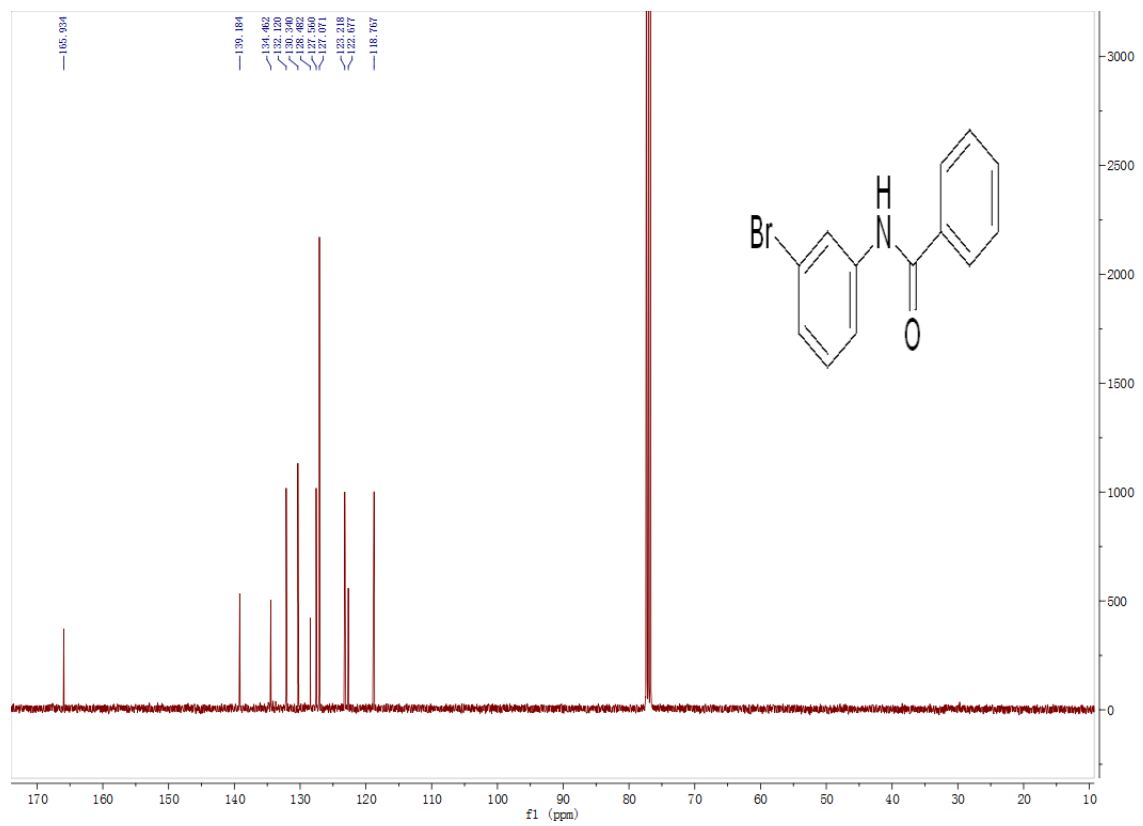

4k

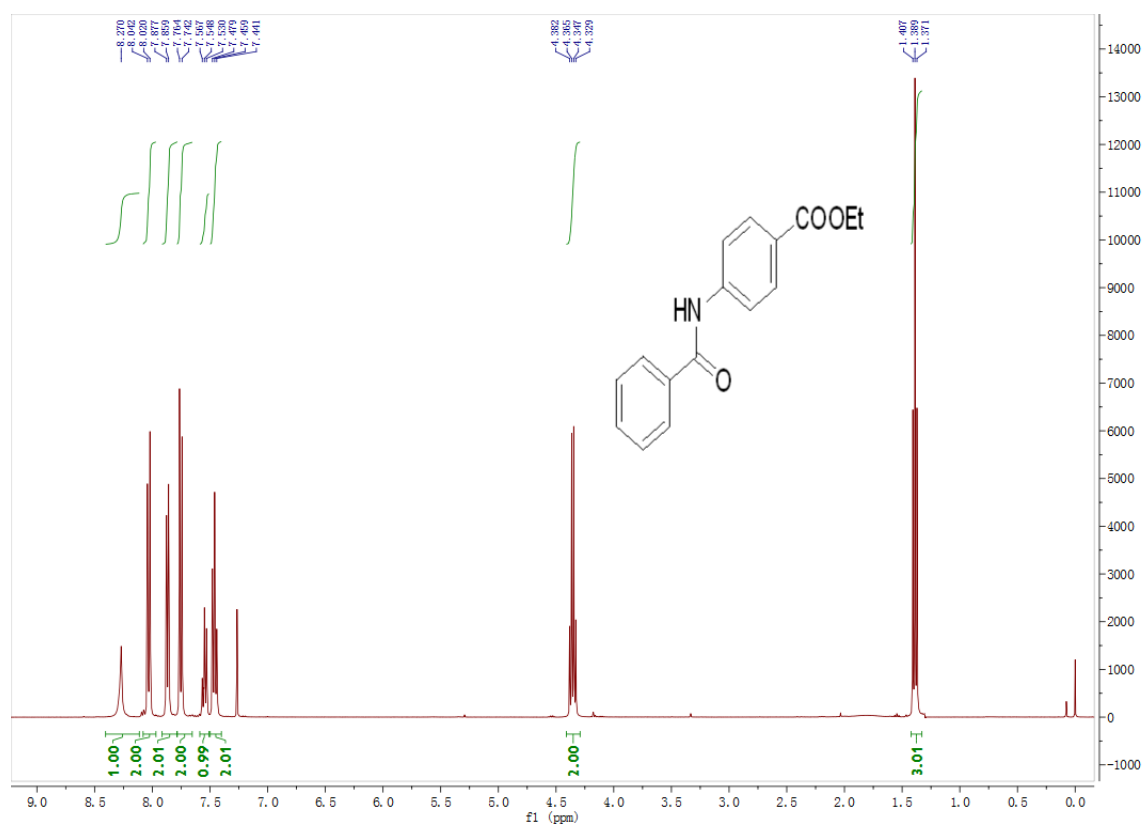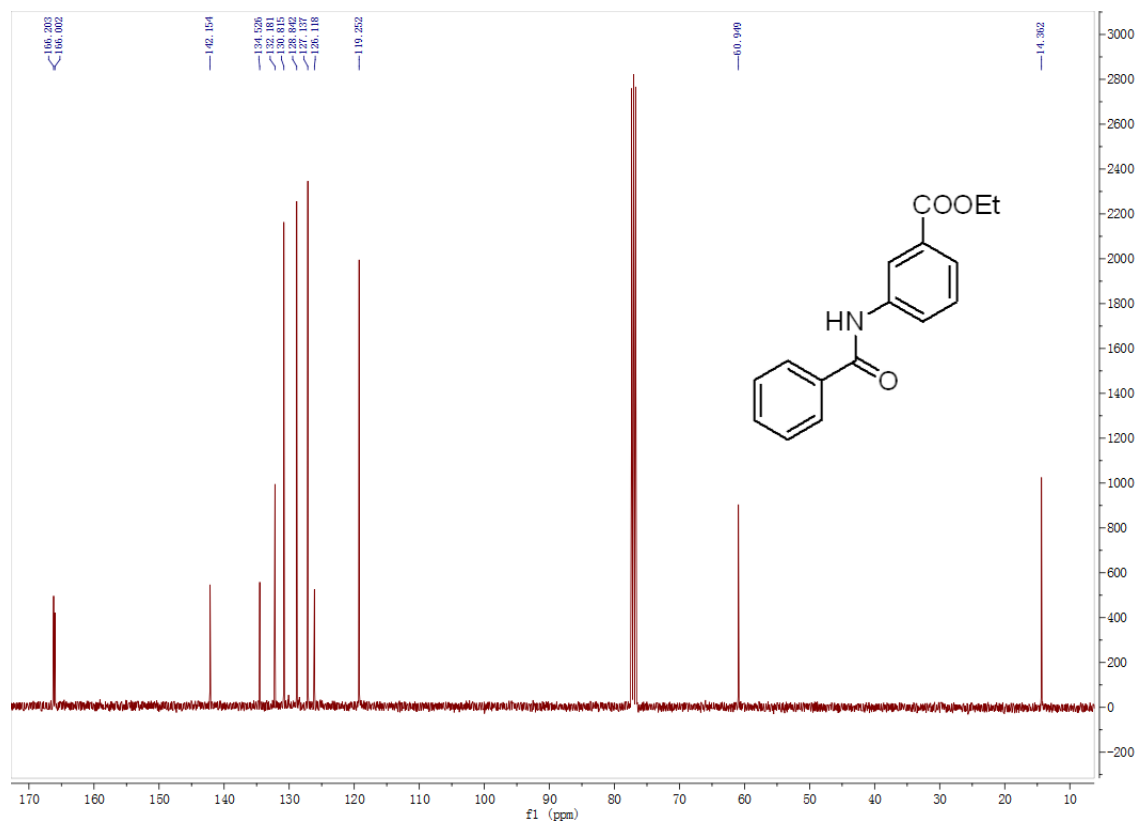

41

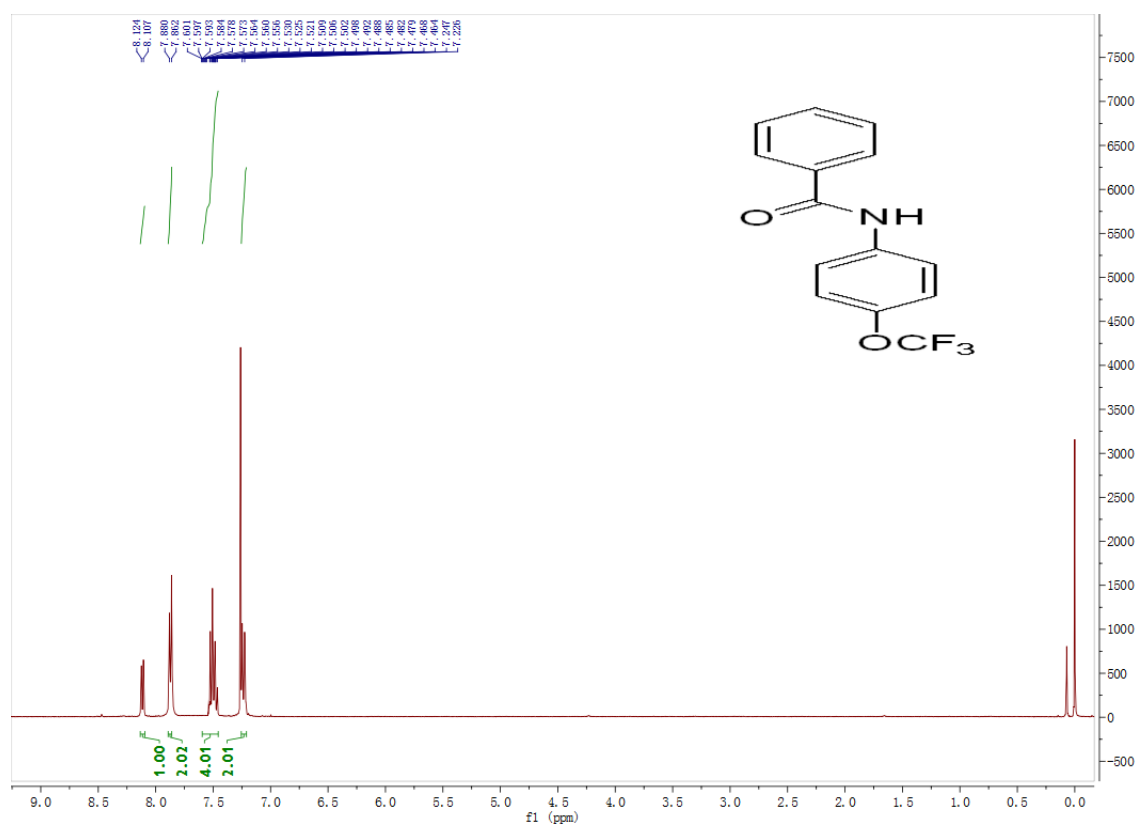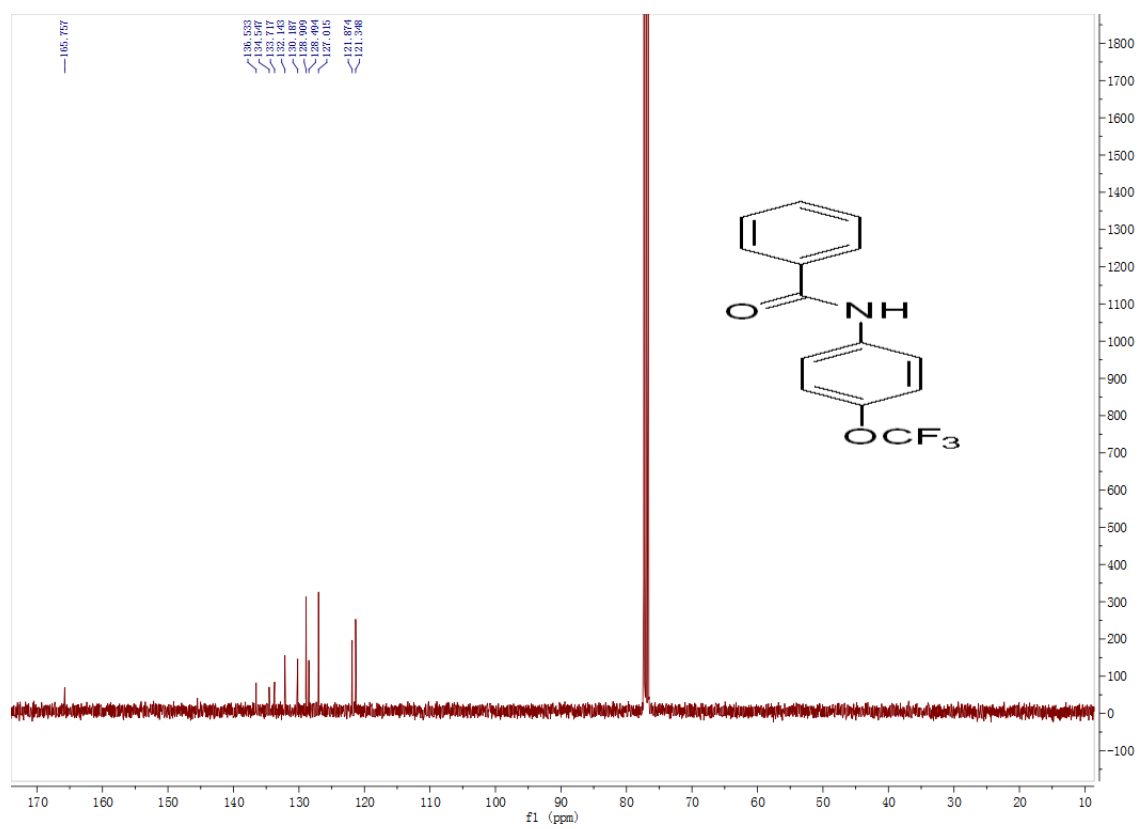



4m

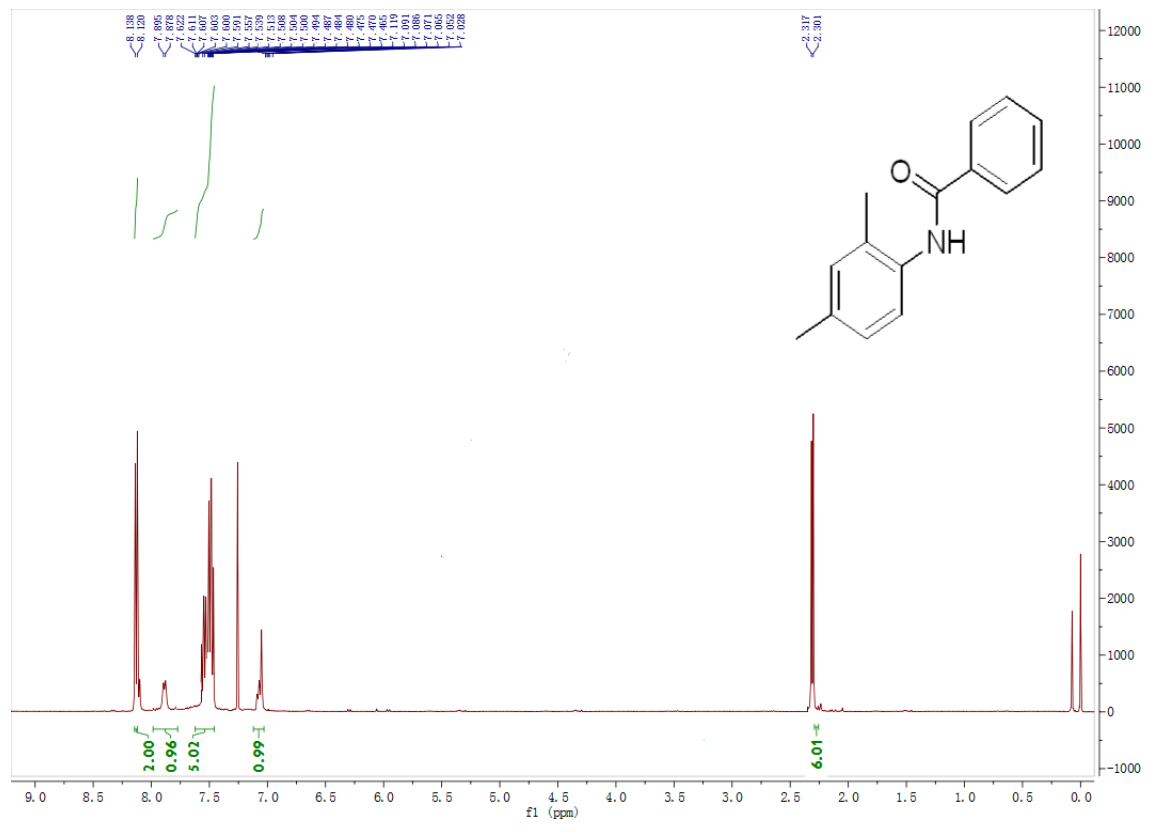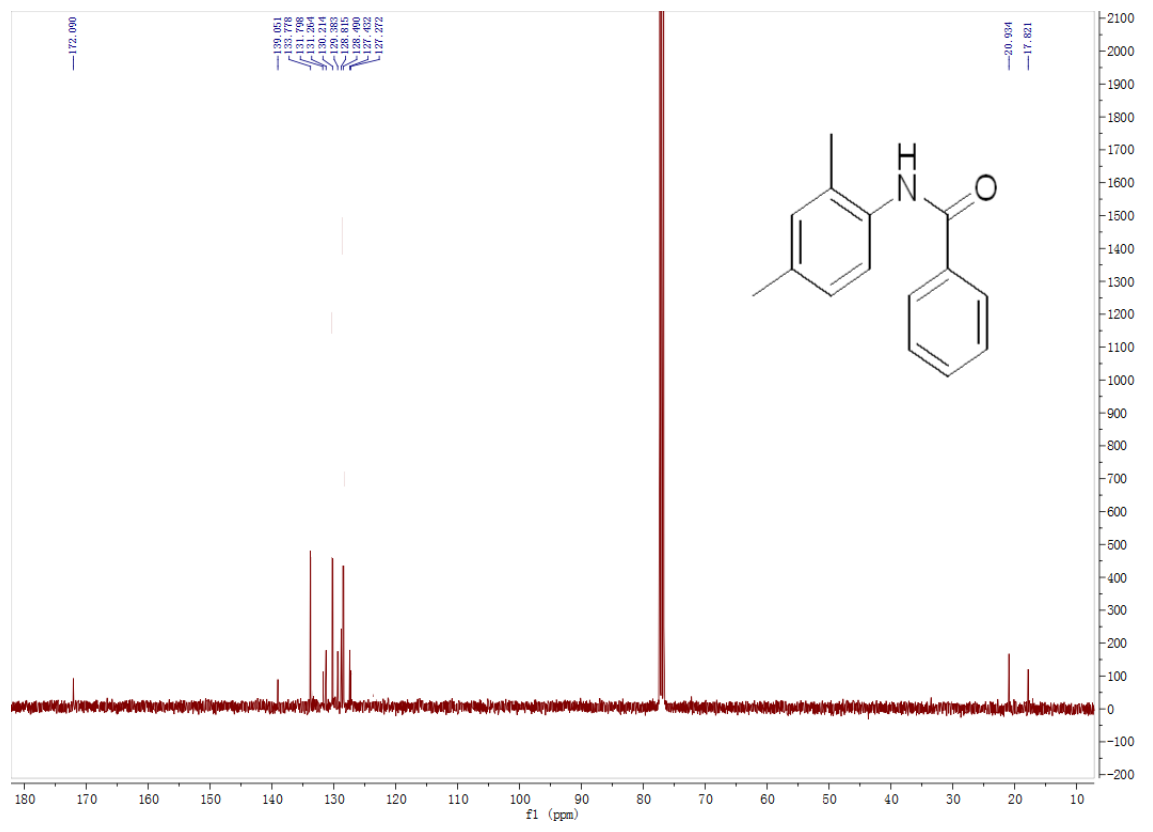

4n

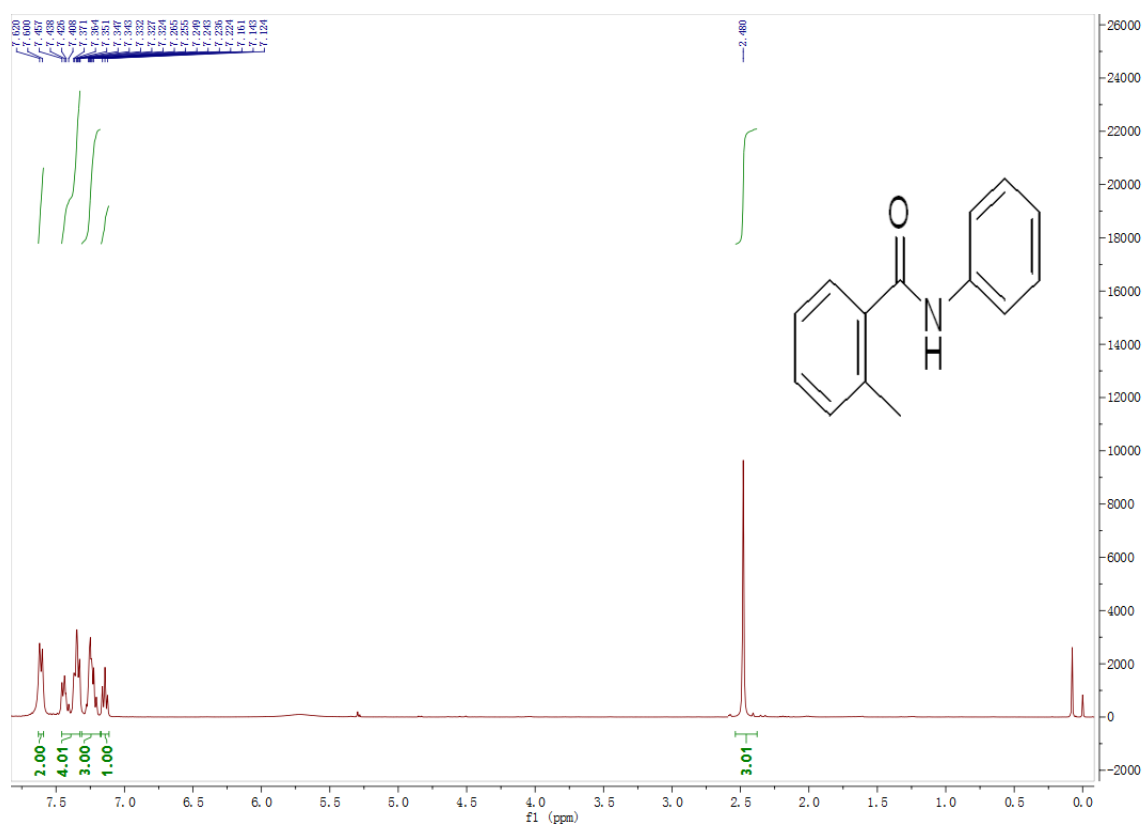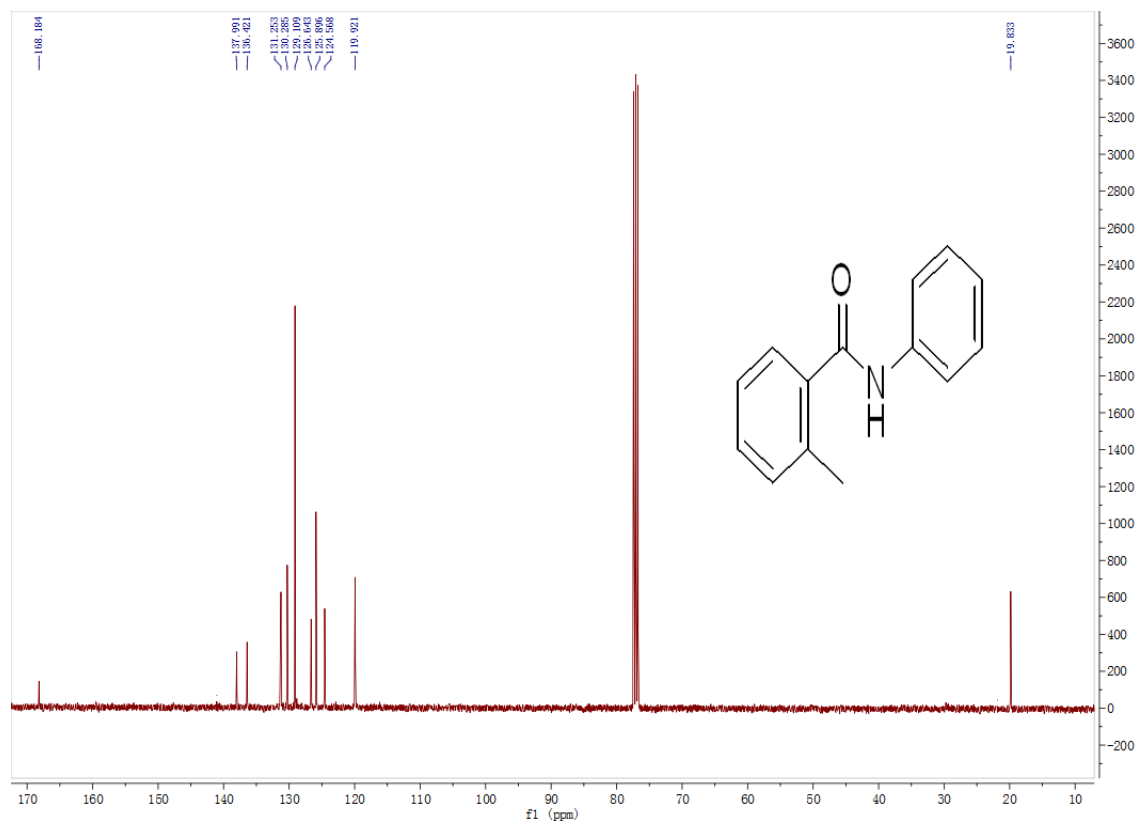

40

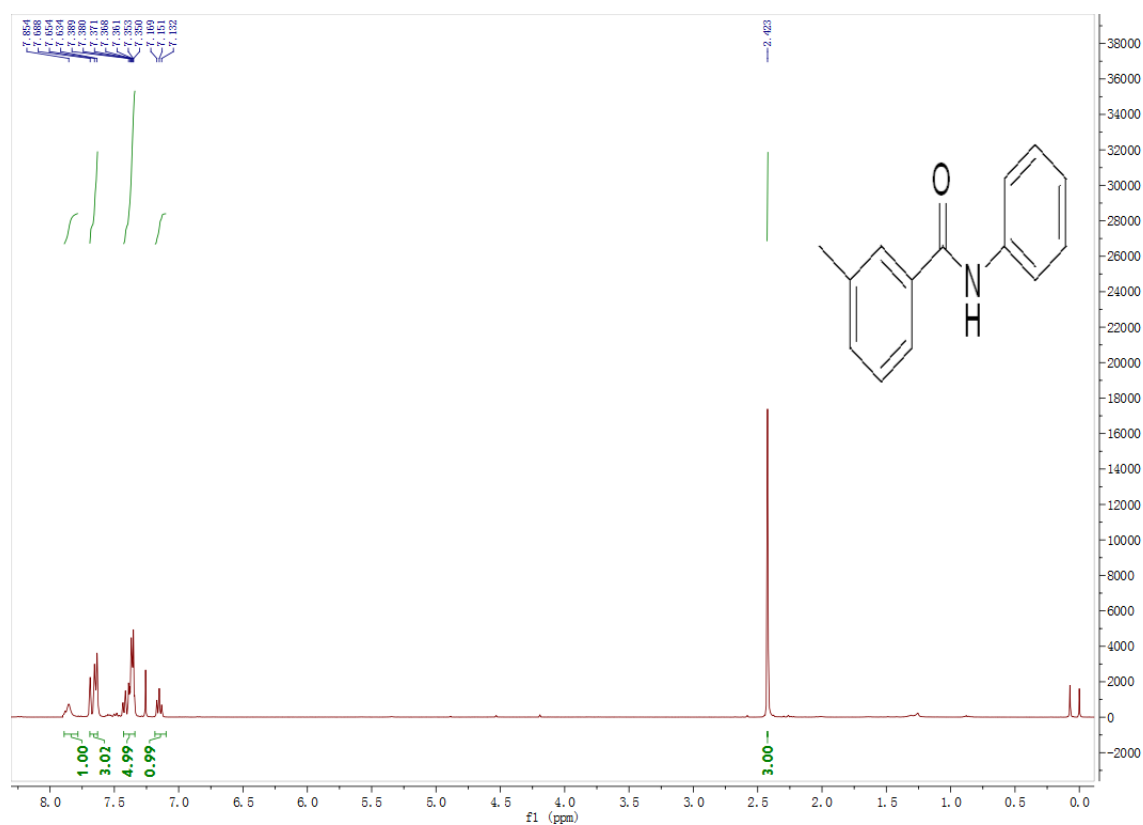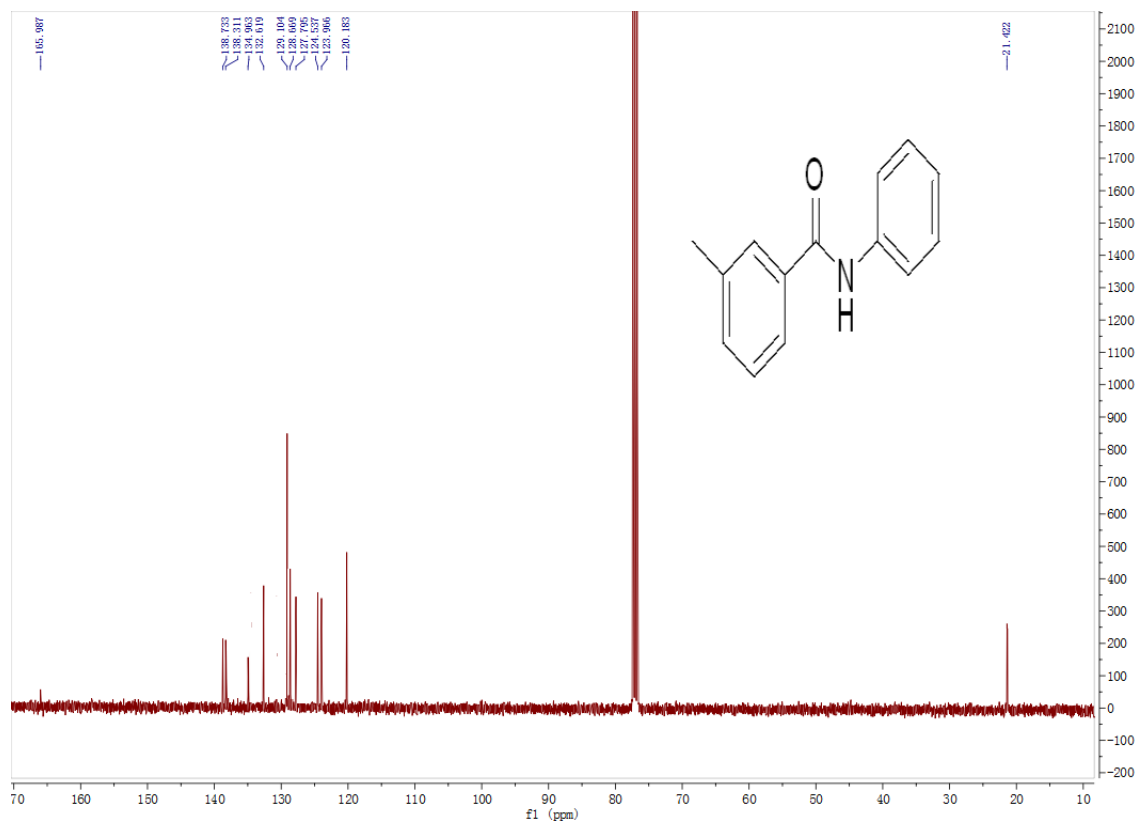

4p

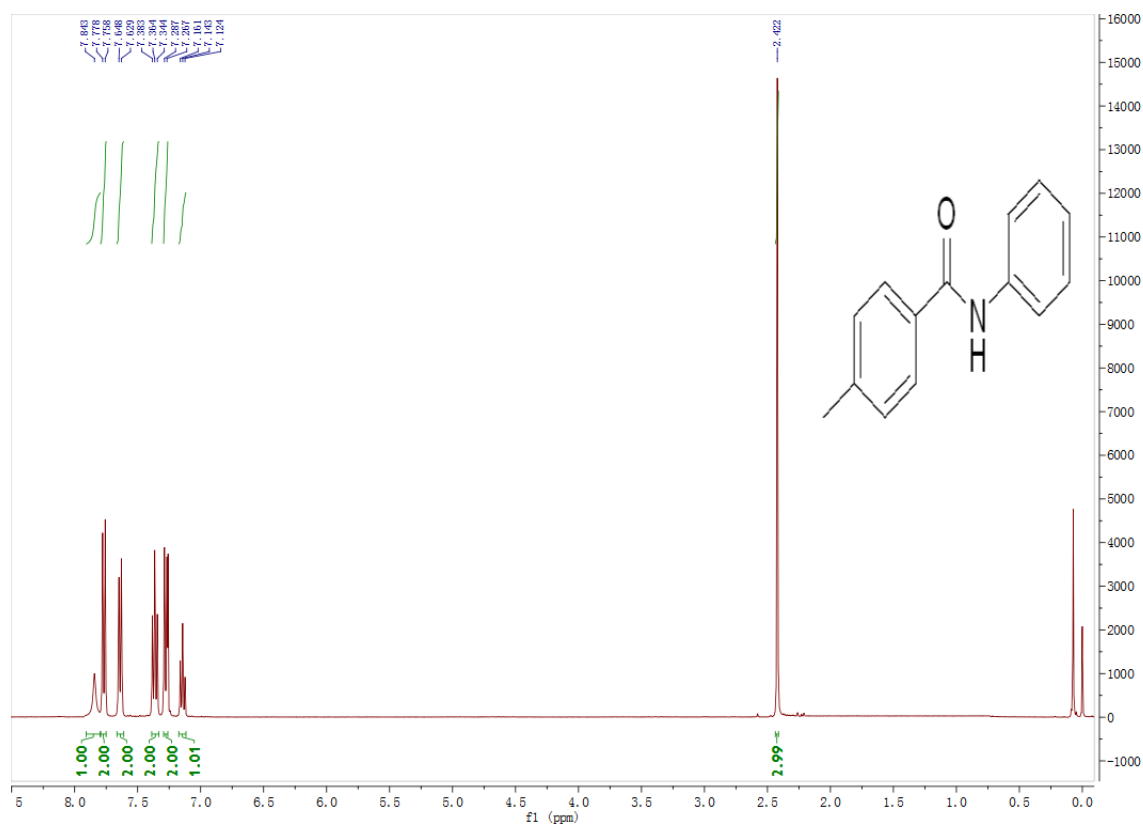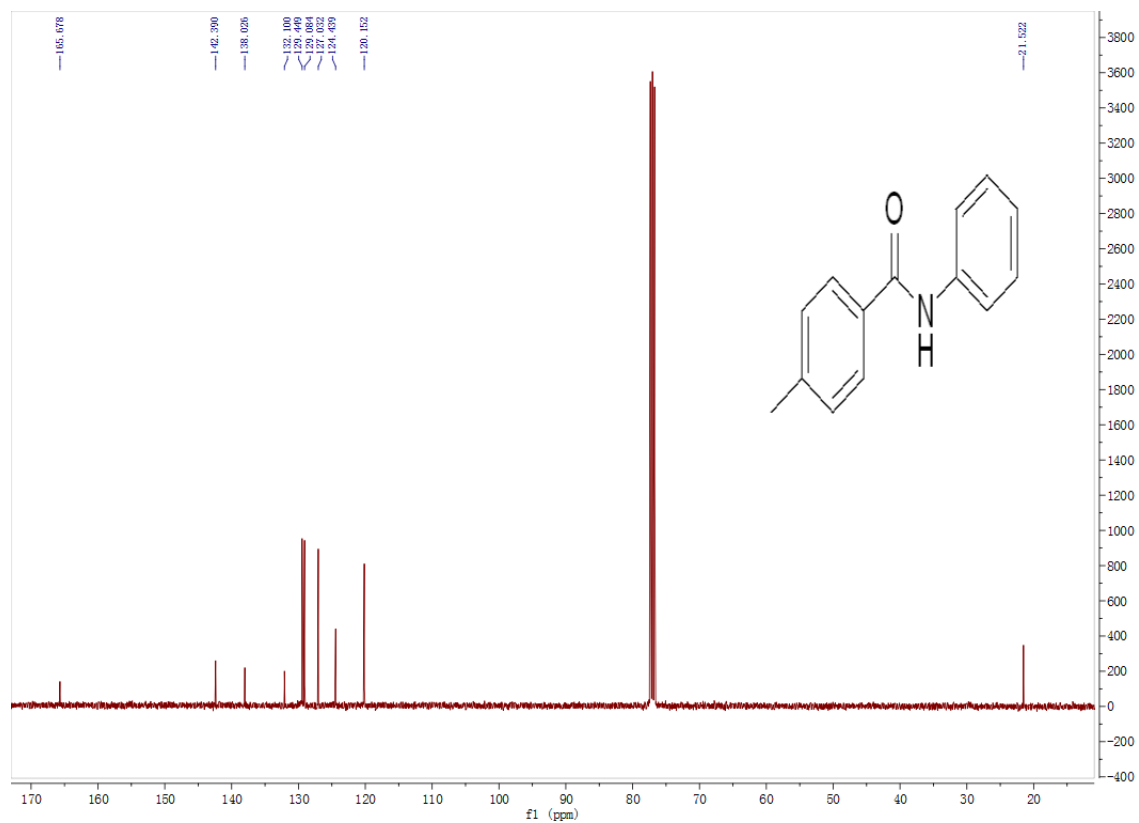

4q

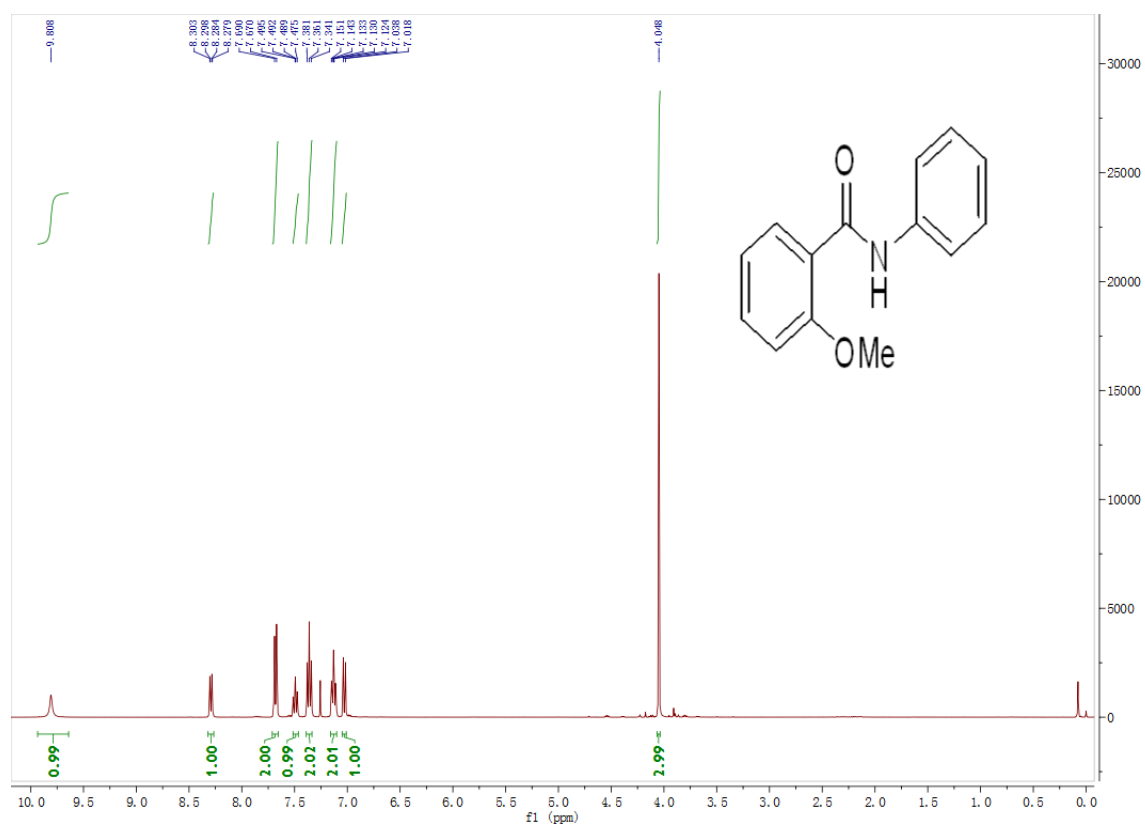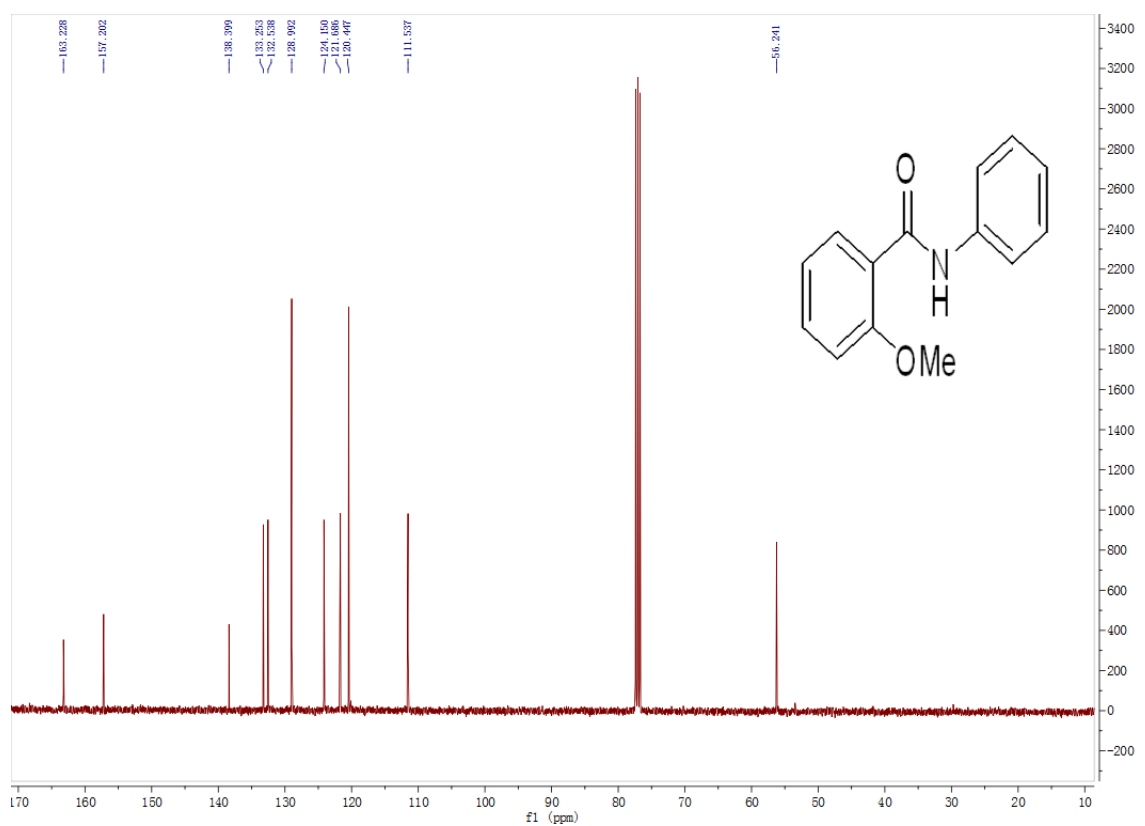

4r

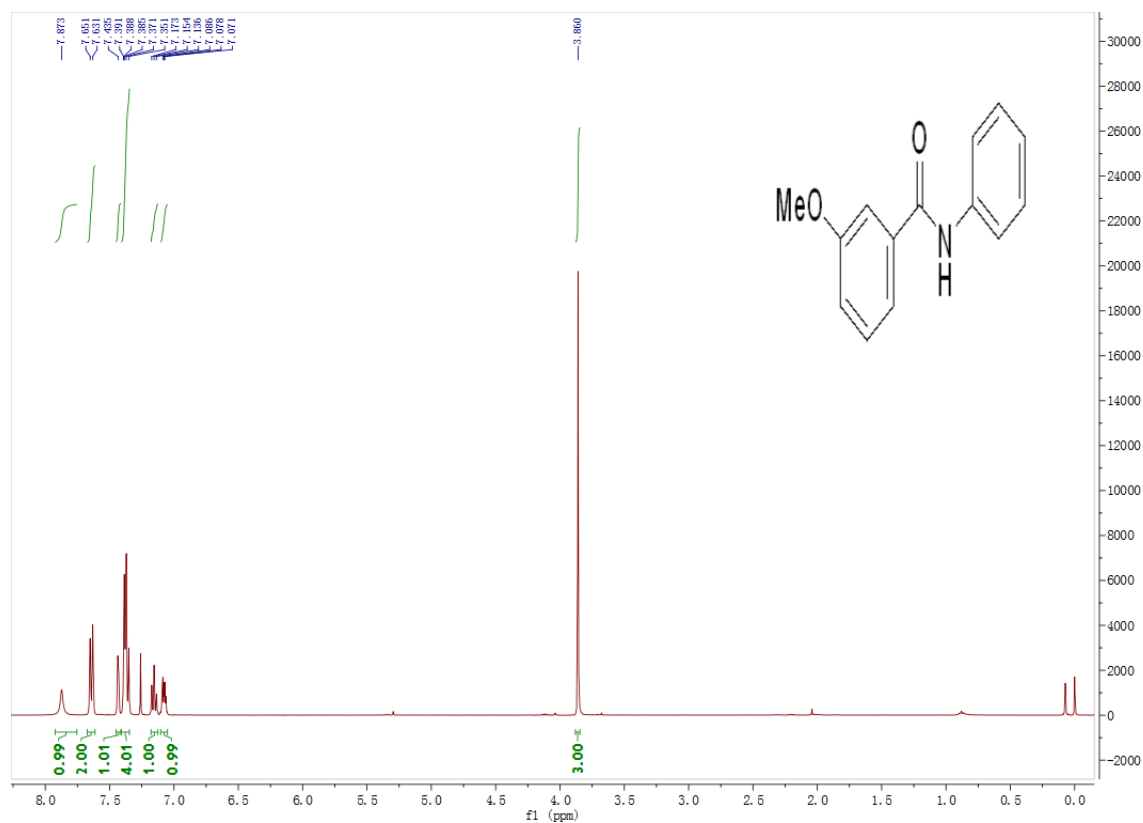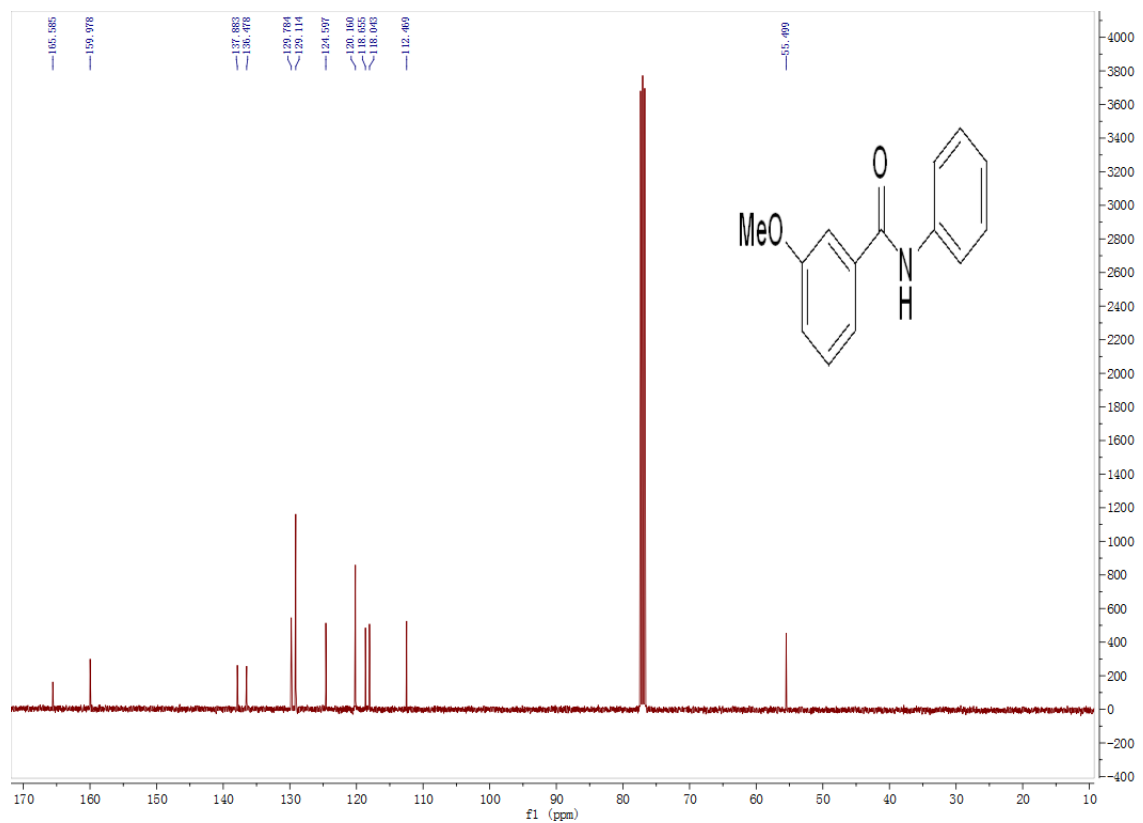

4s

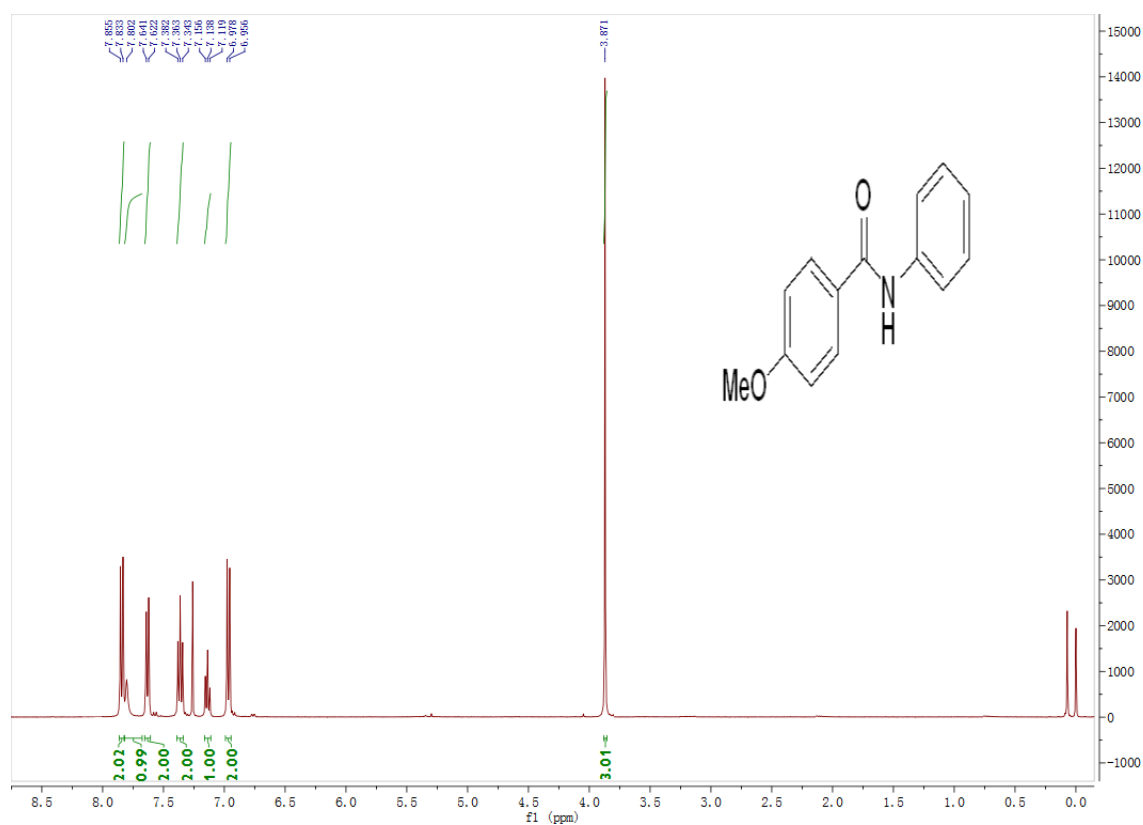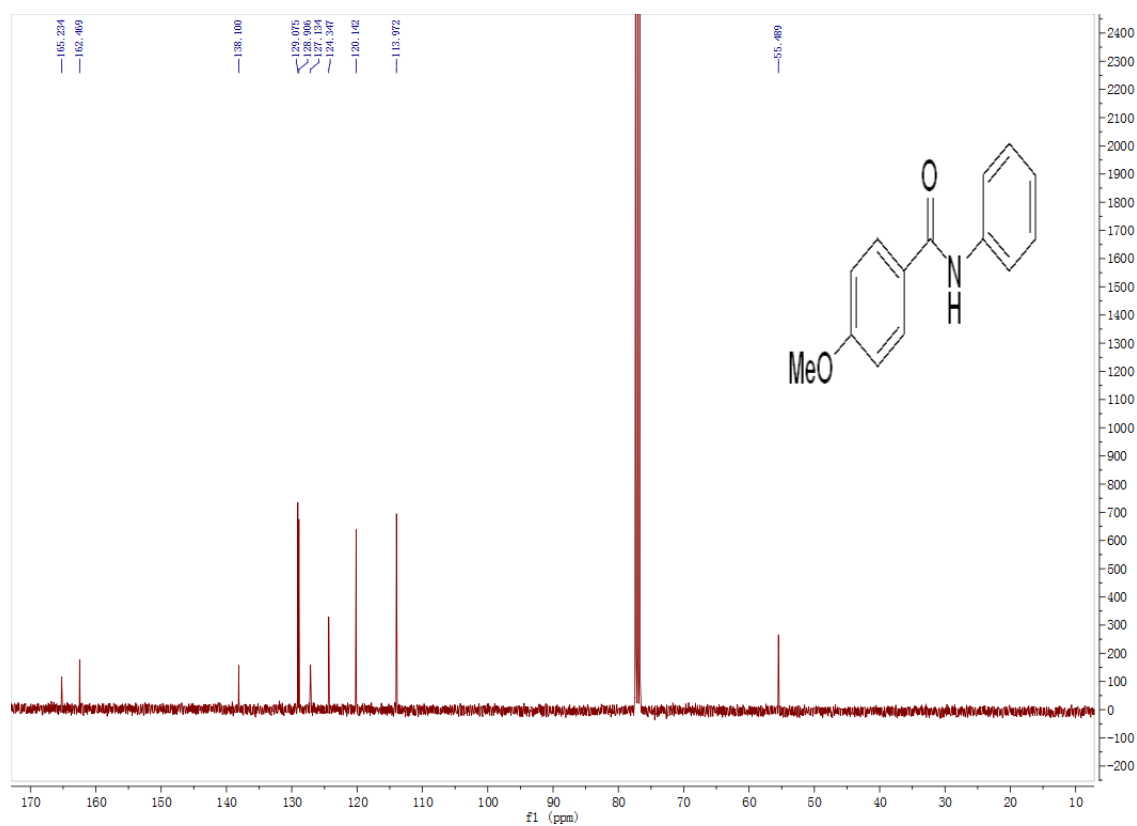

4t

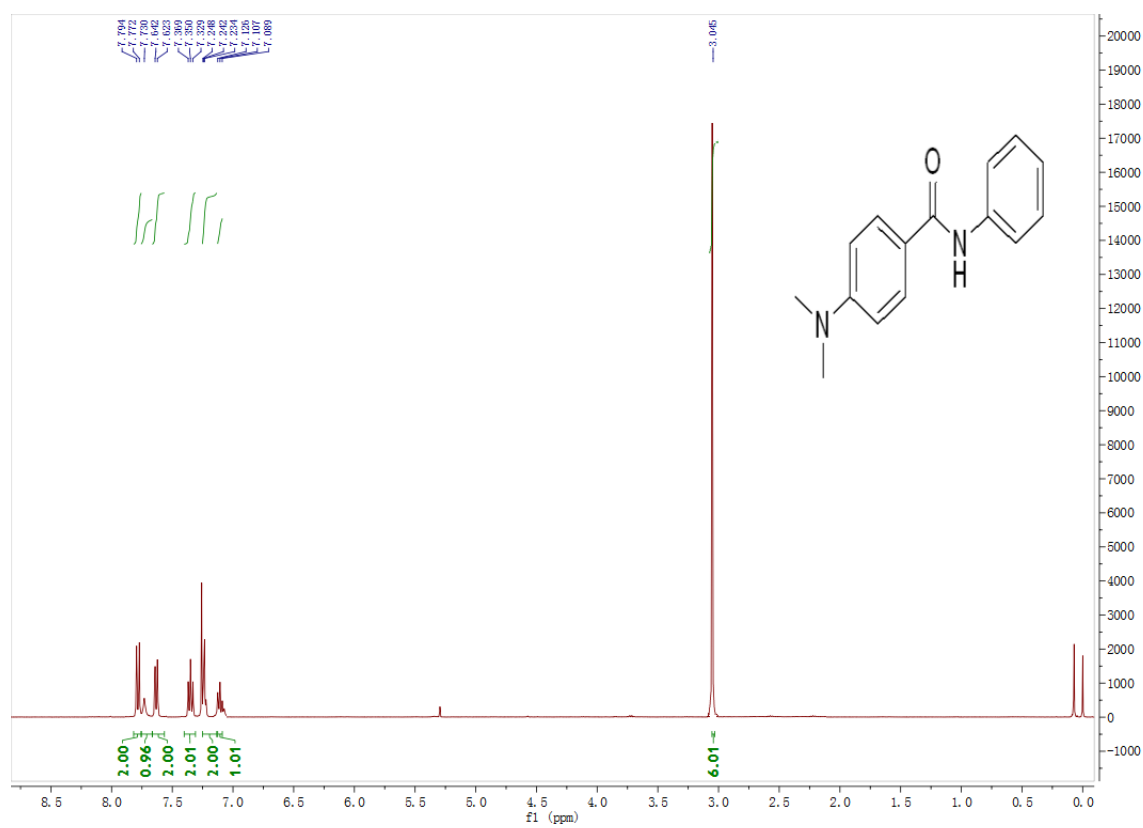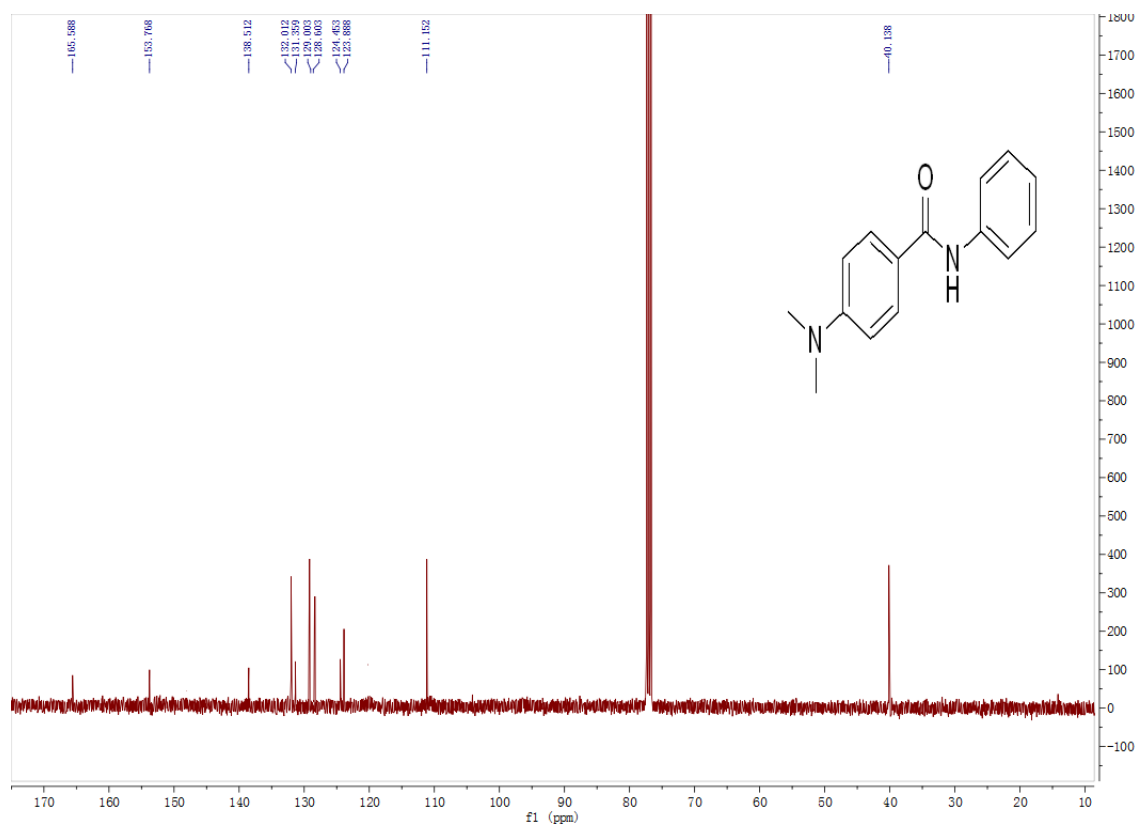



4u

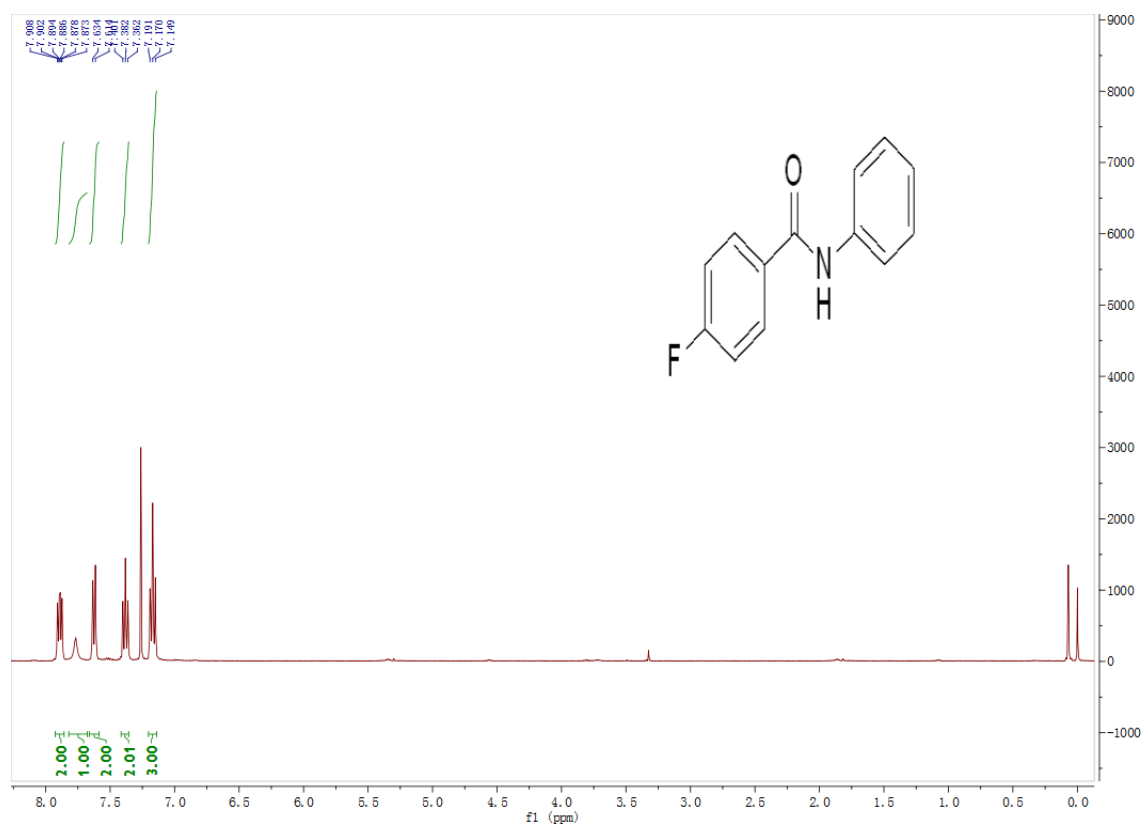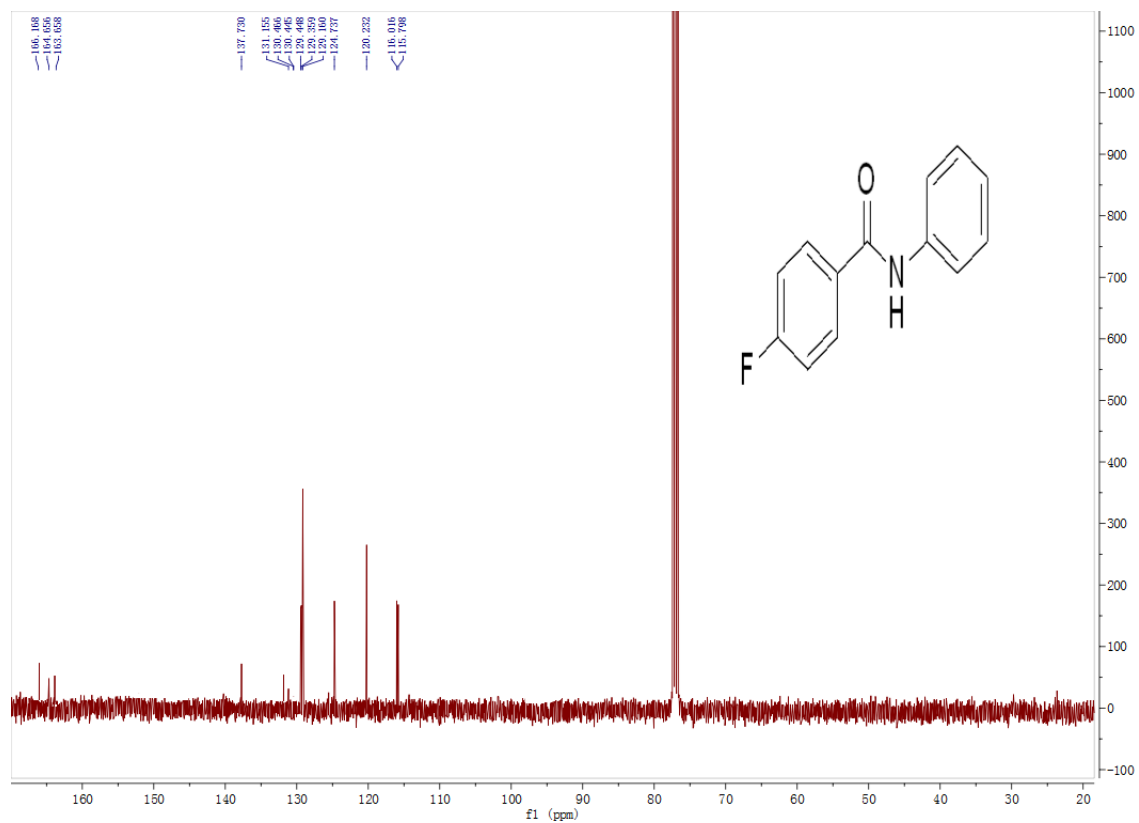

4v

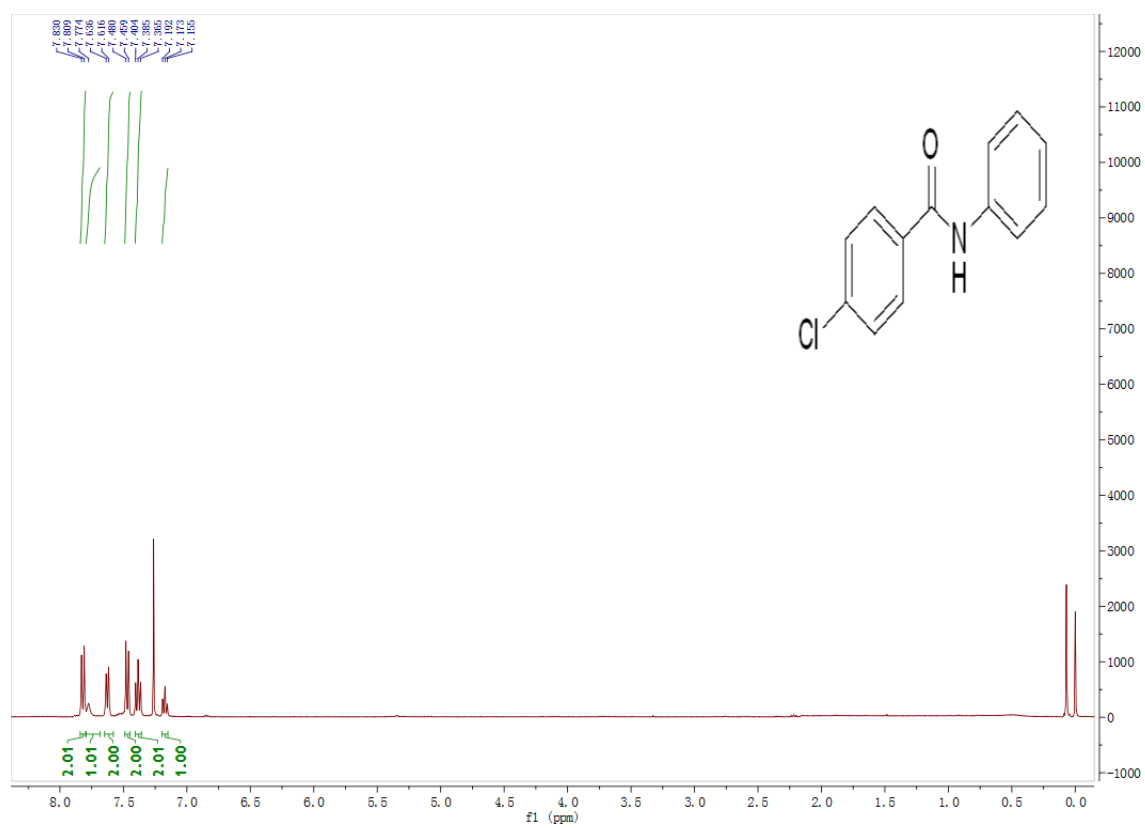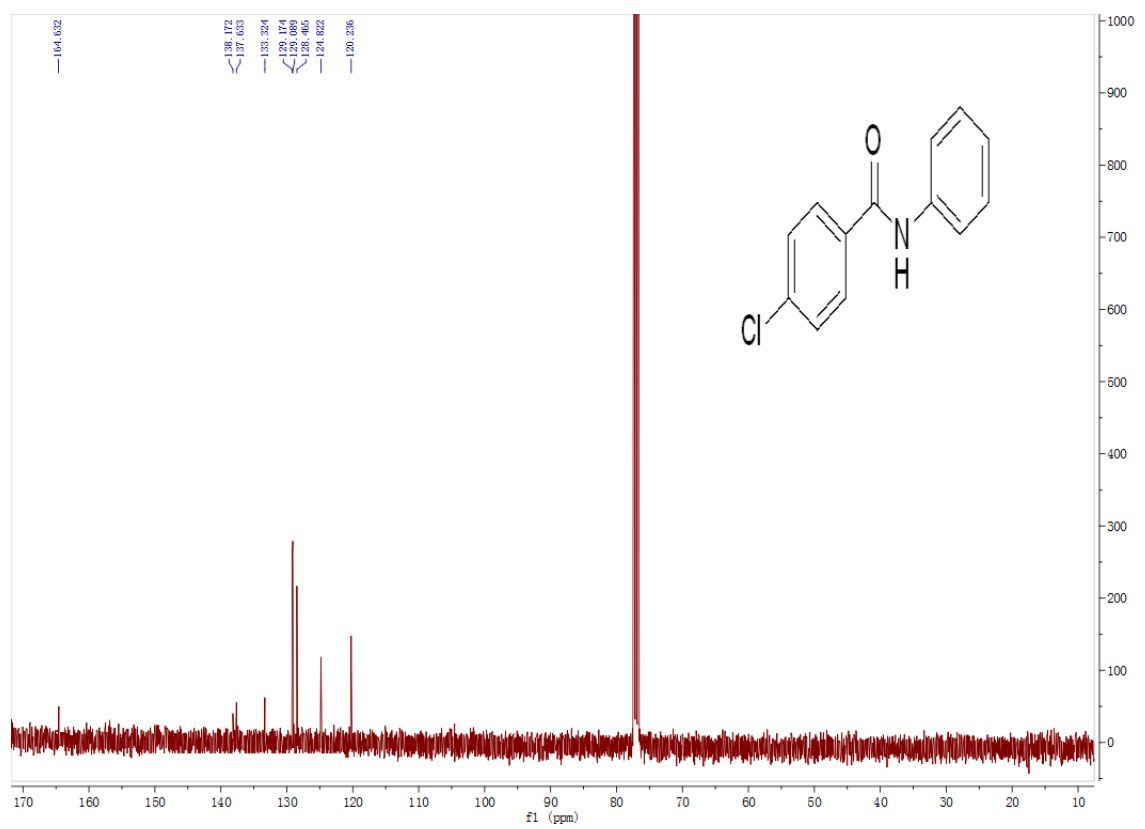

4w

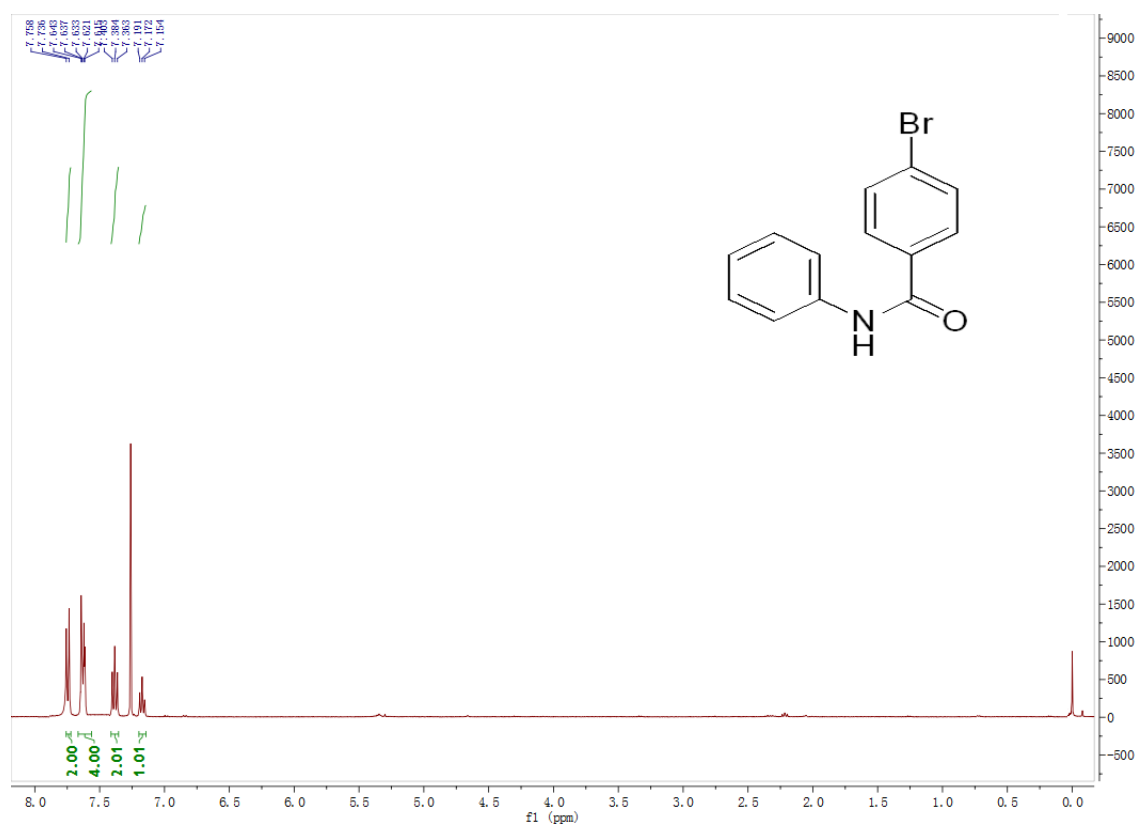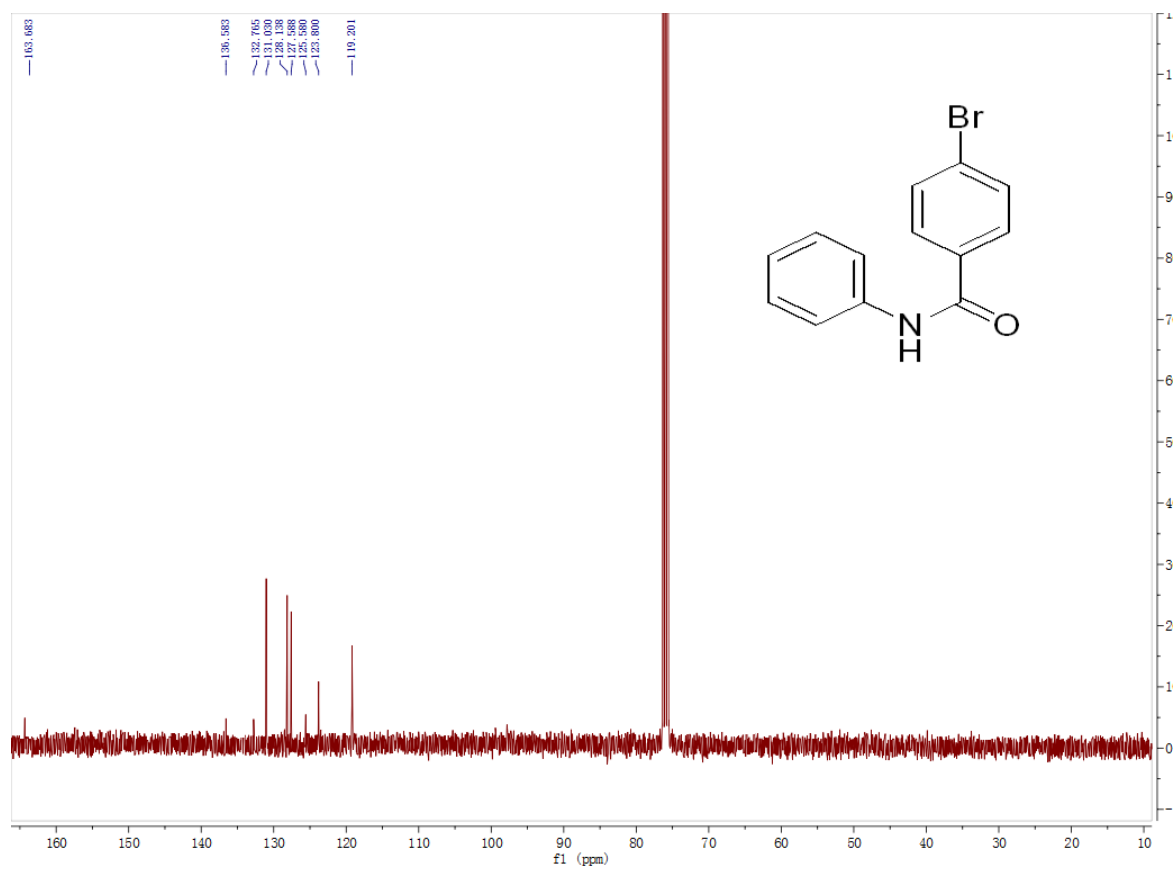

4x

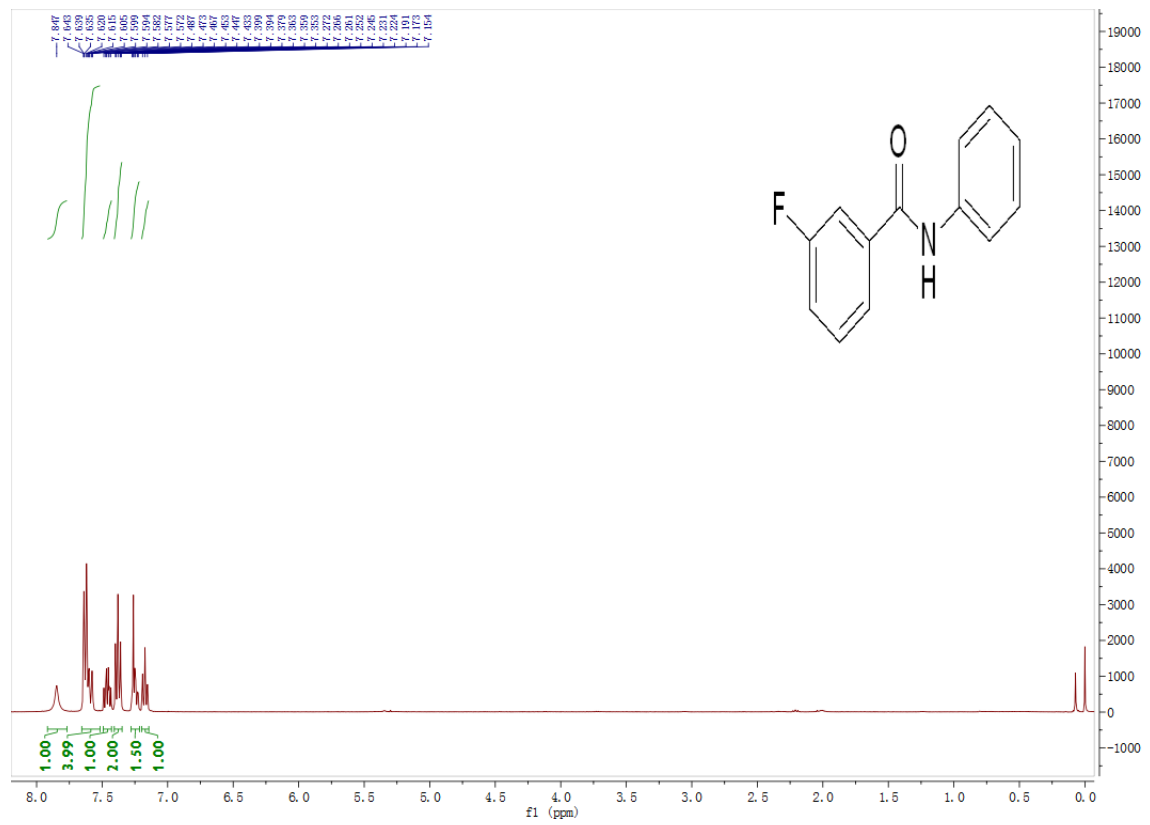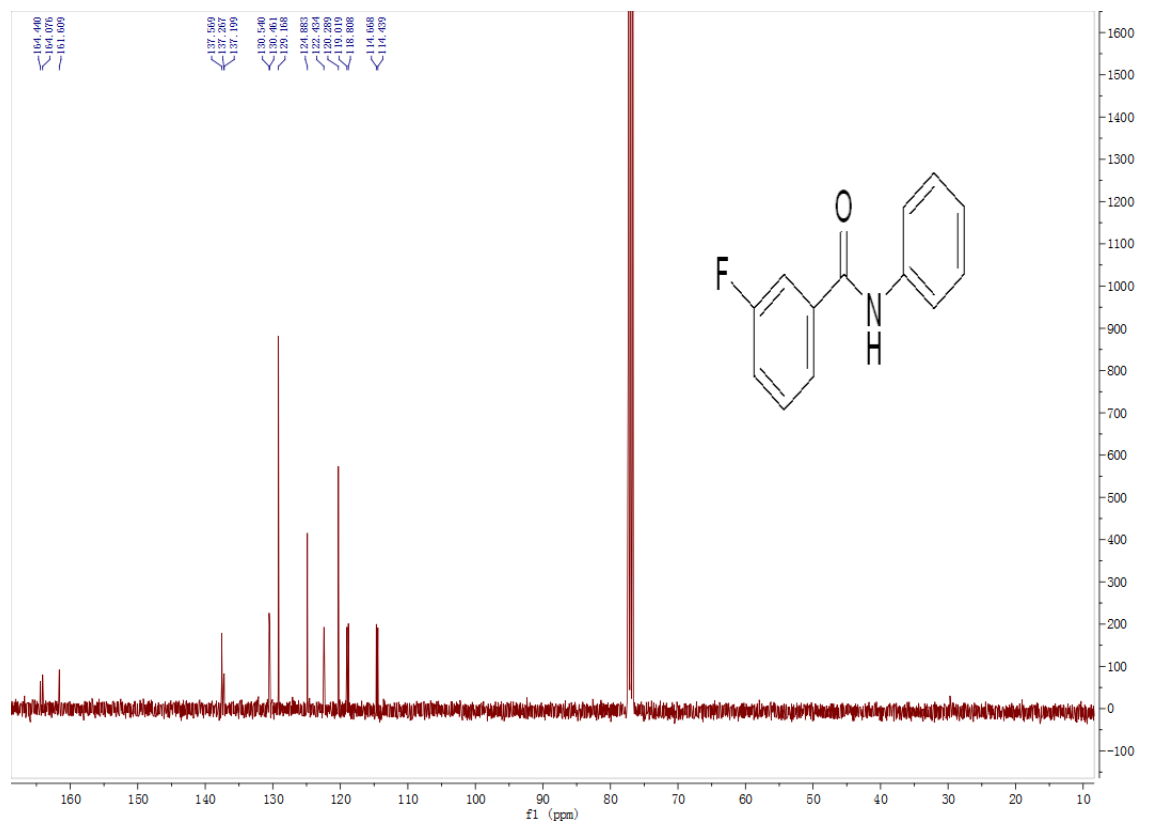

4y

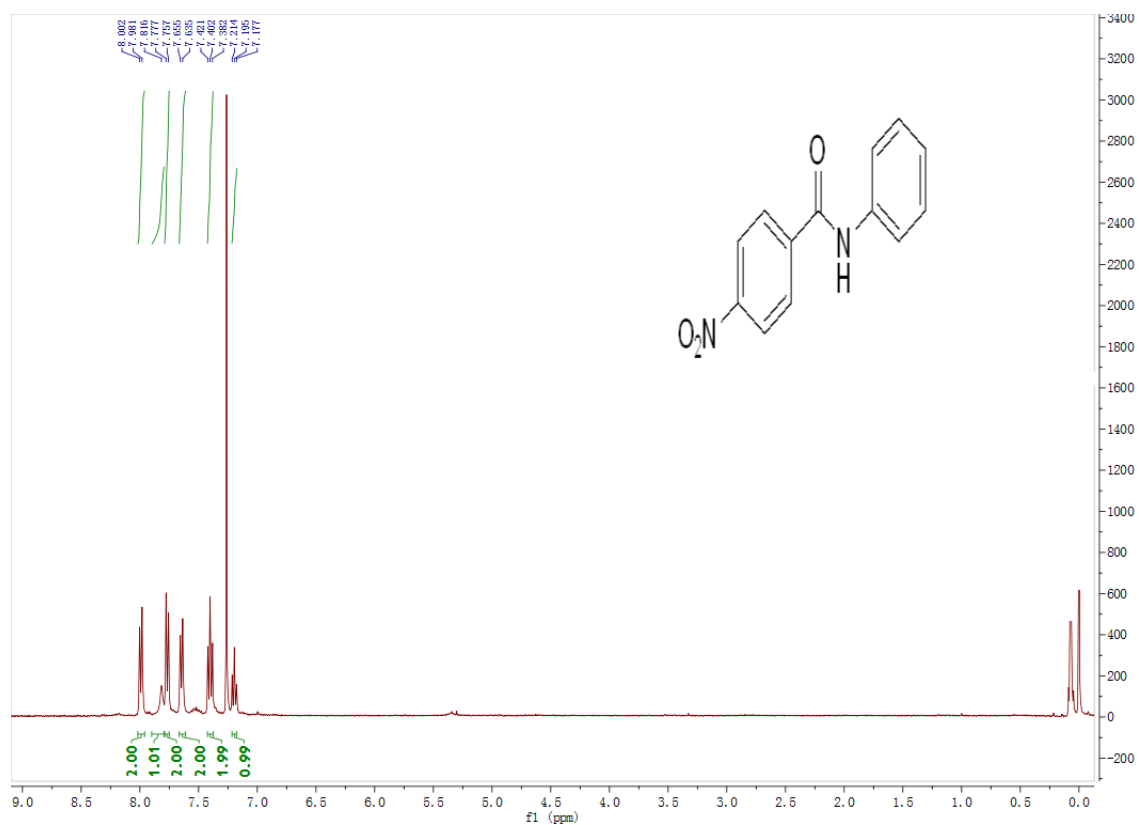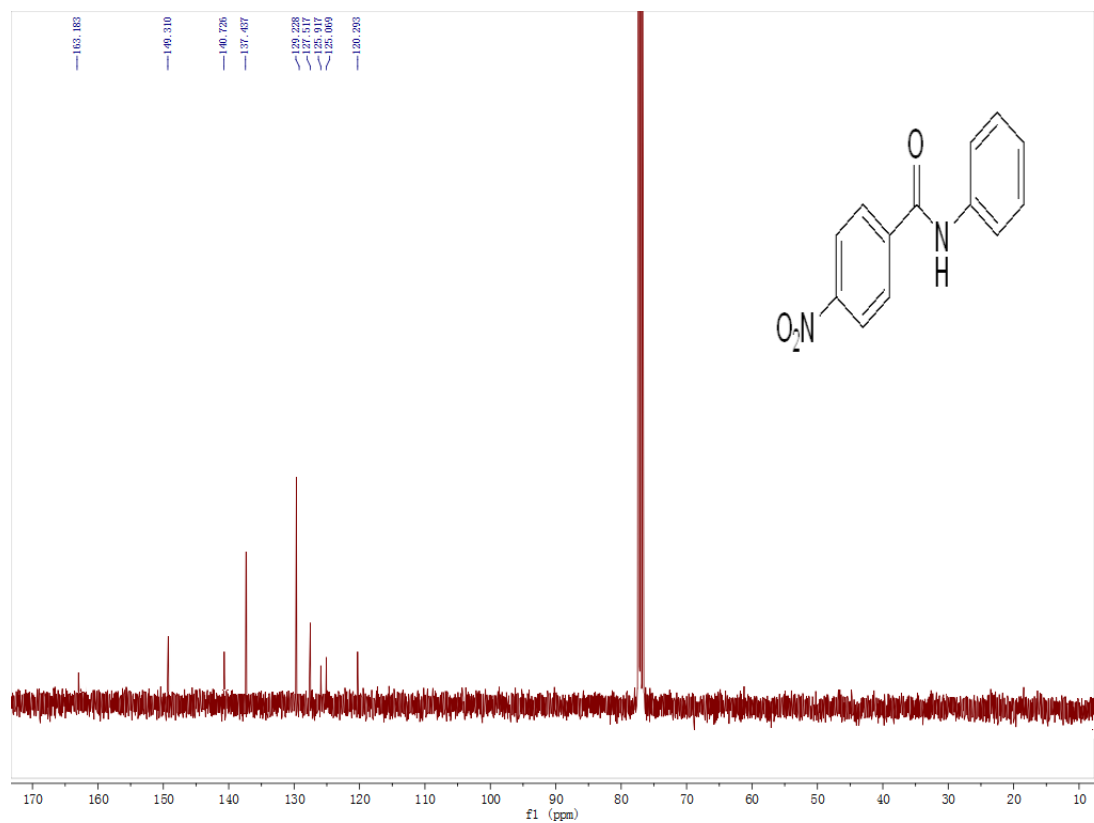

4z

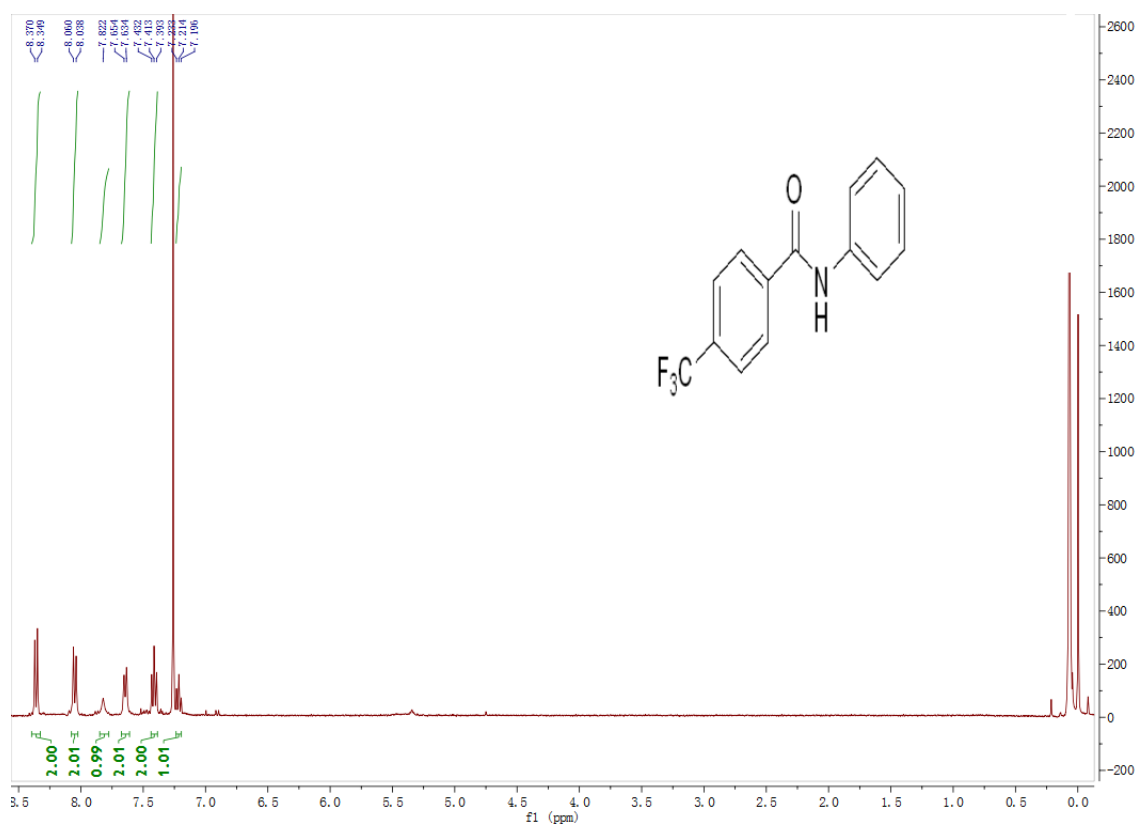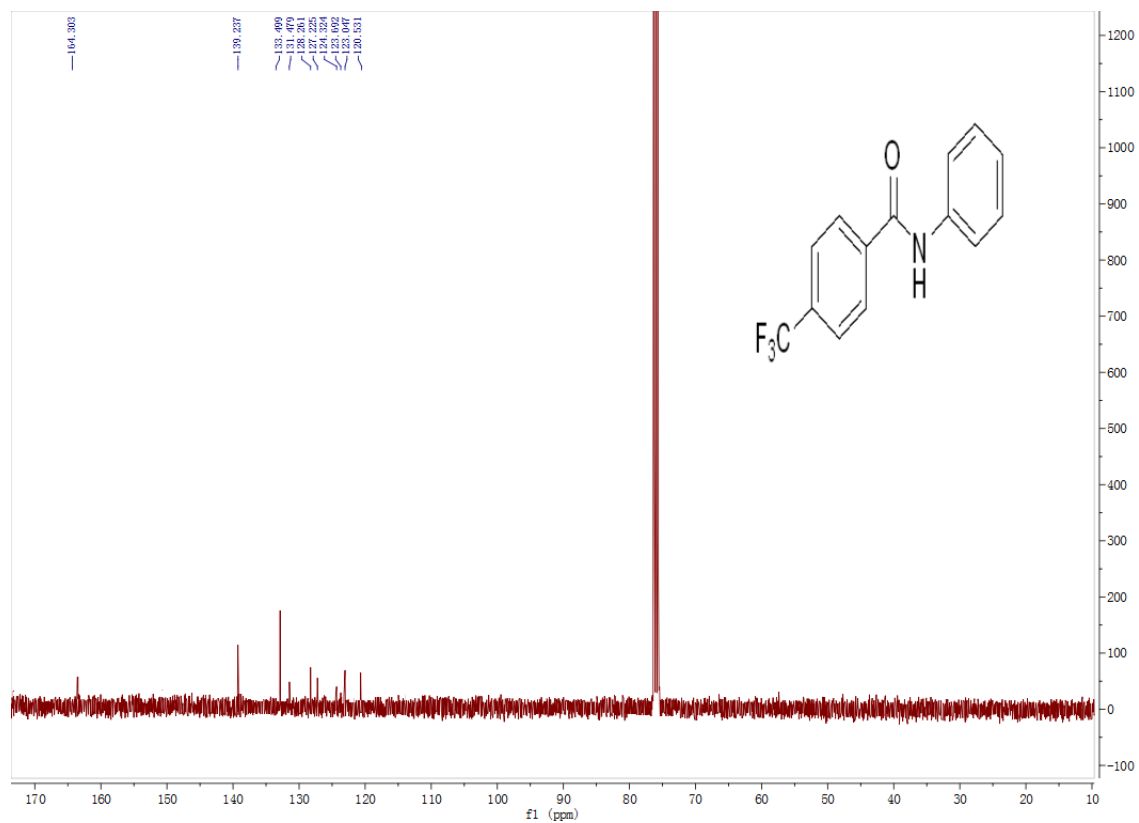

4aa

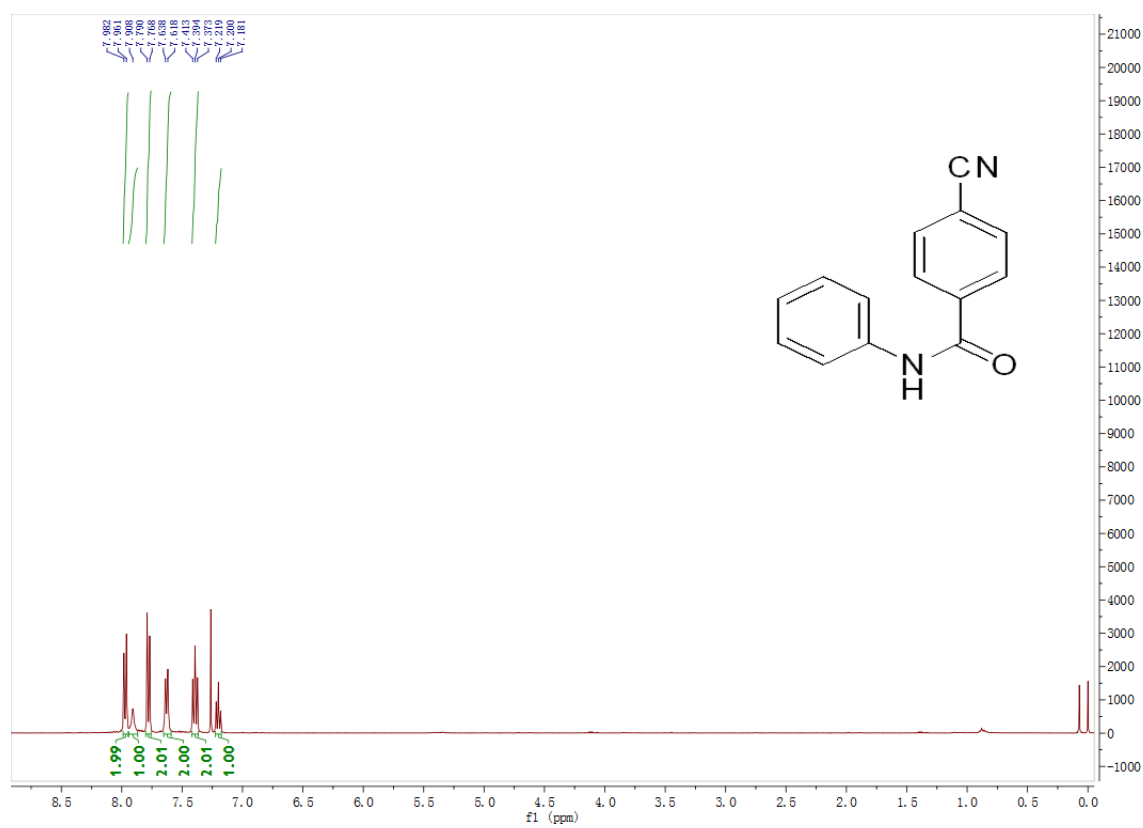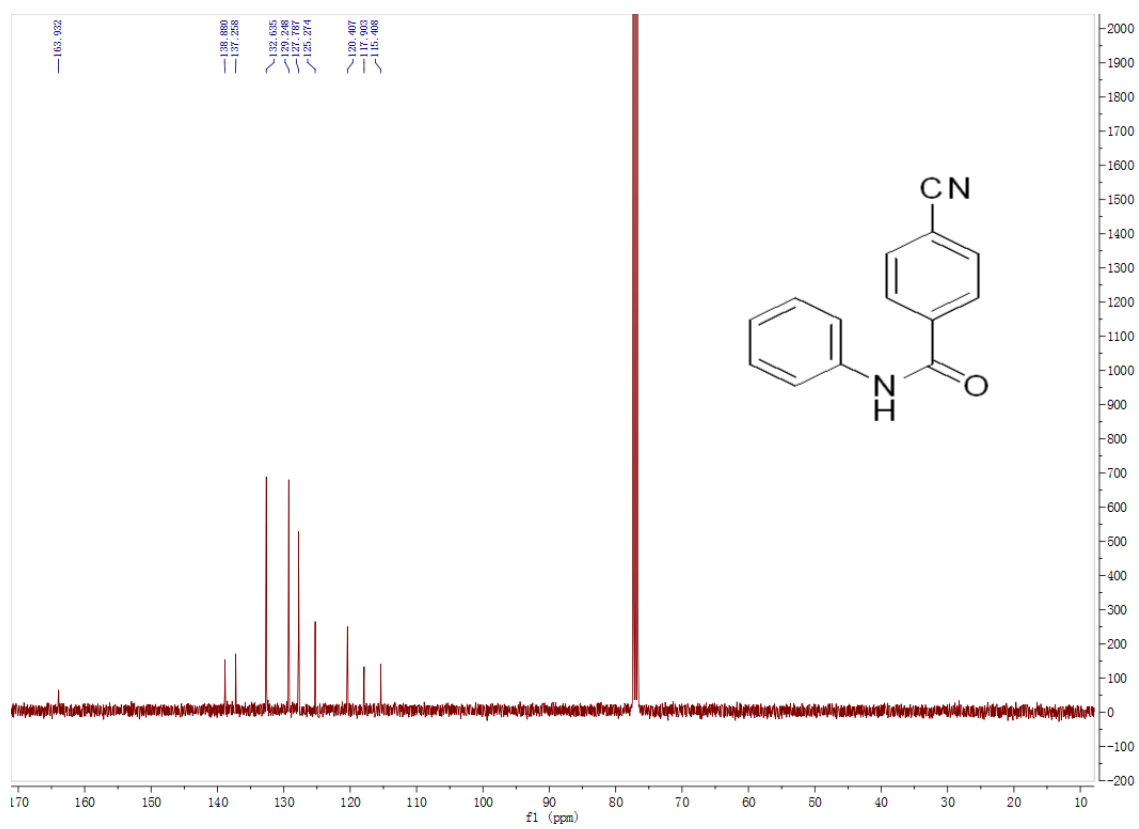

4ab

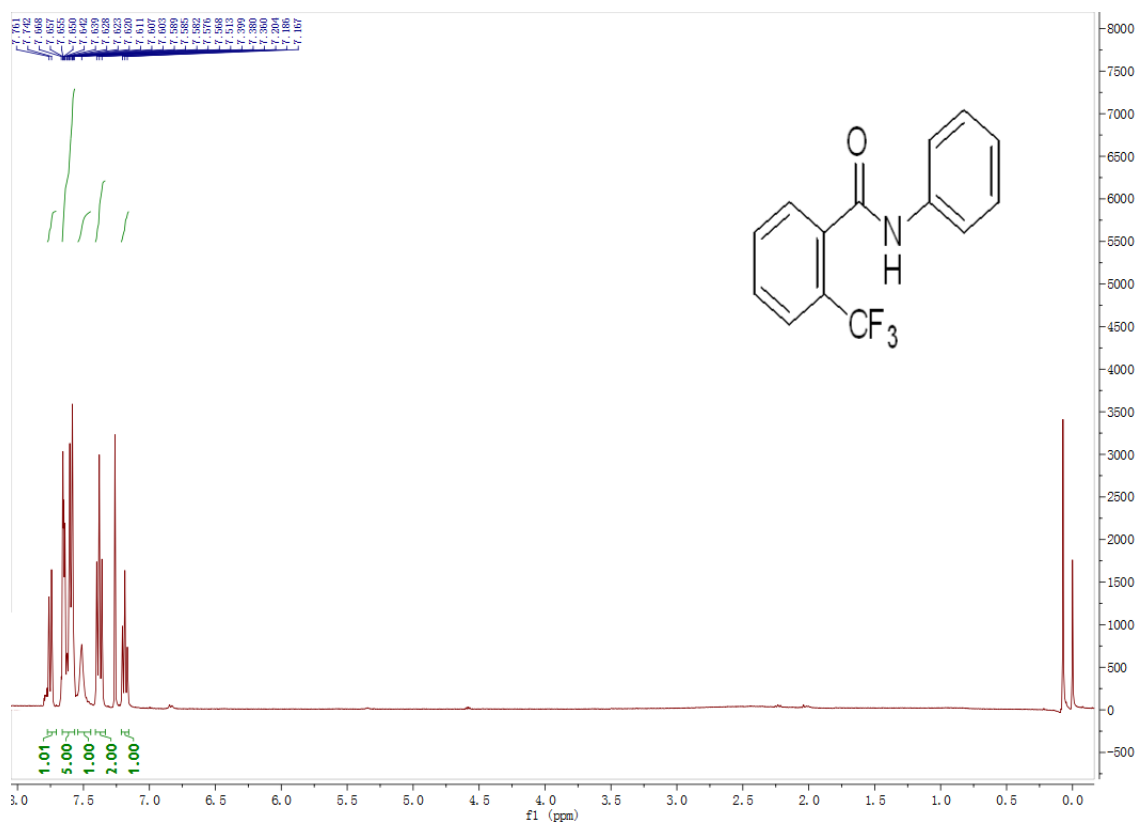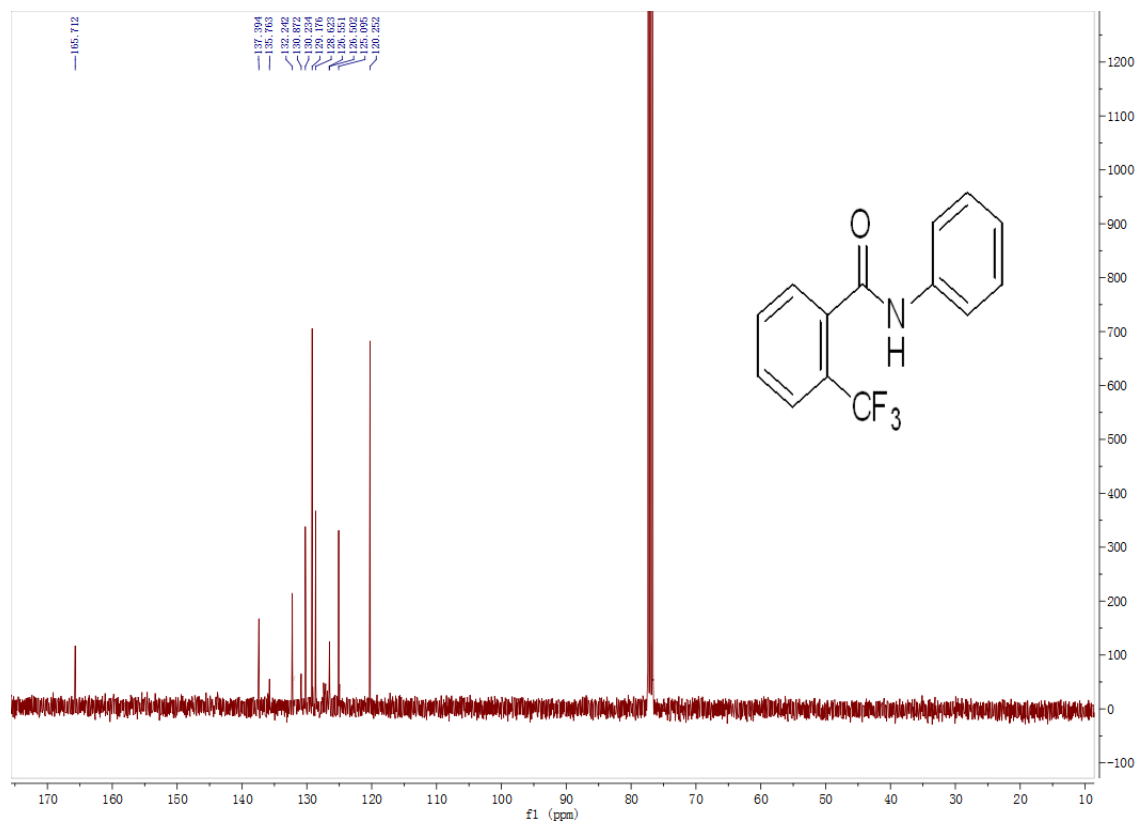



4ac

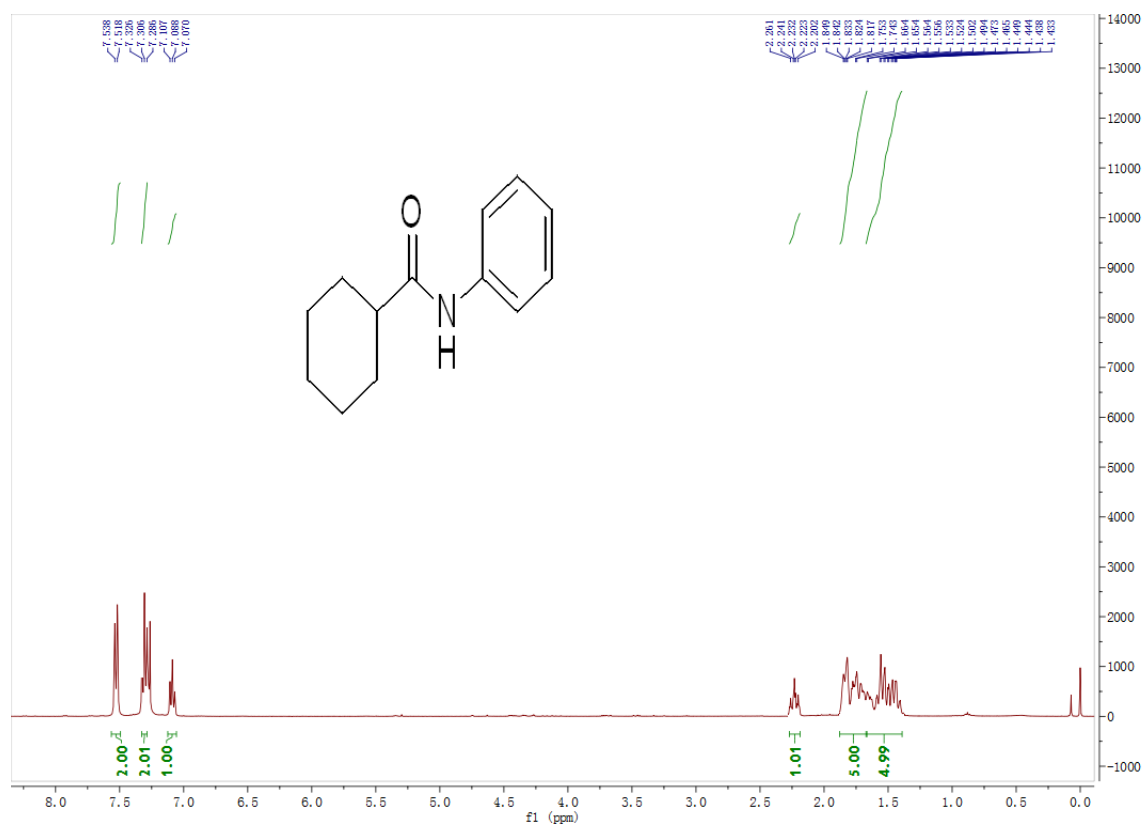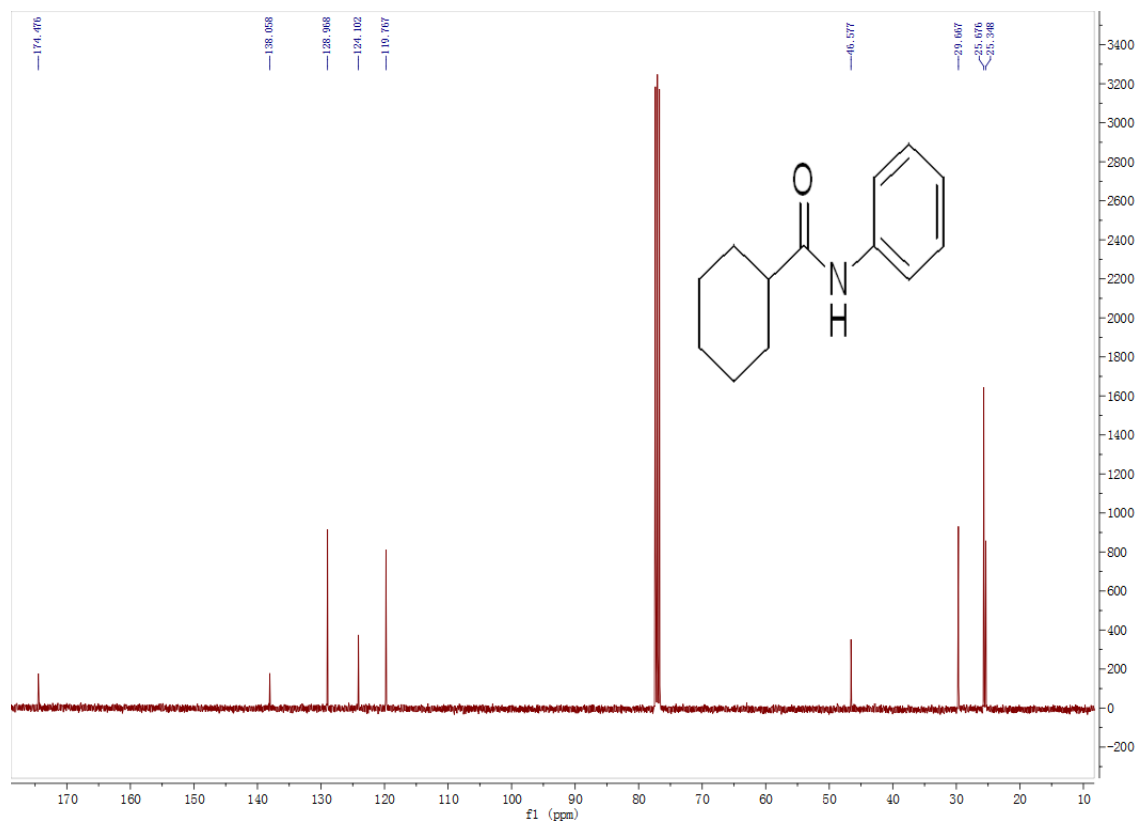

4ad

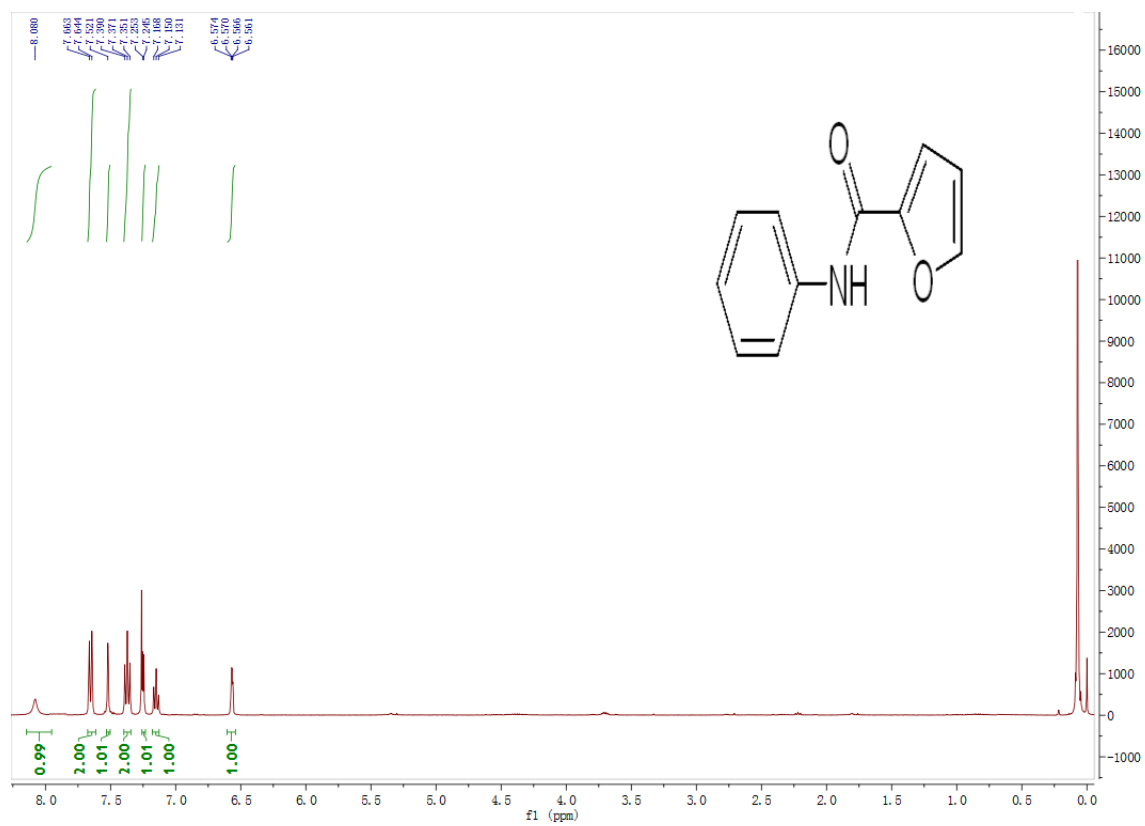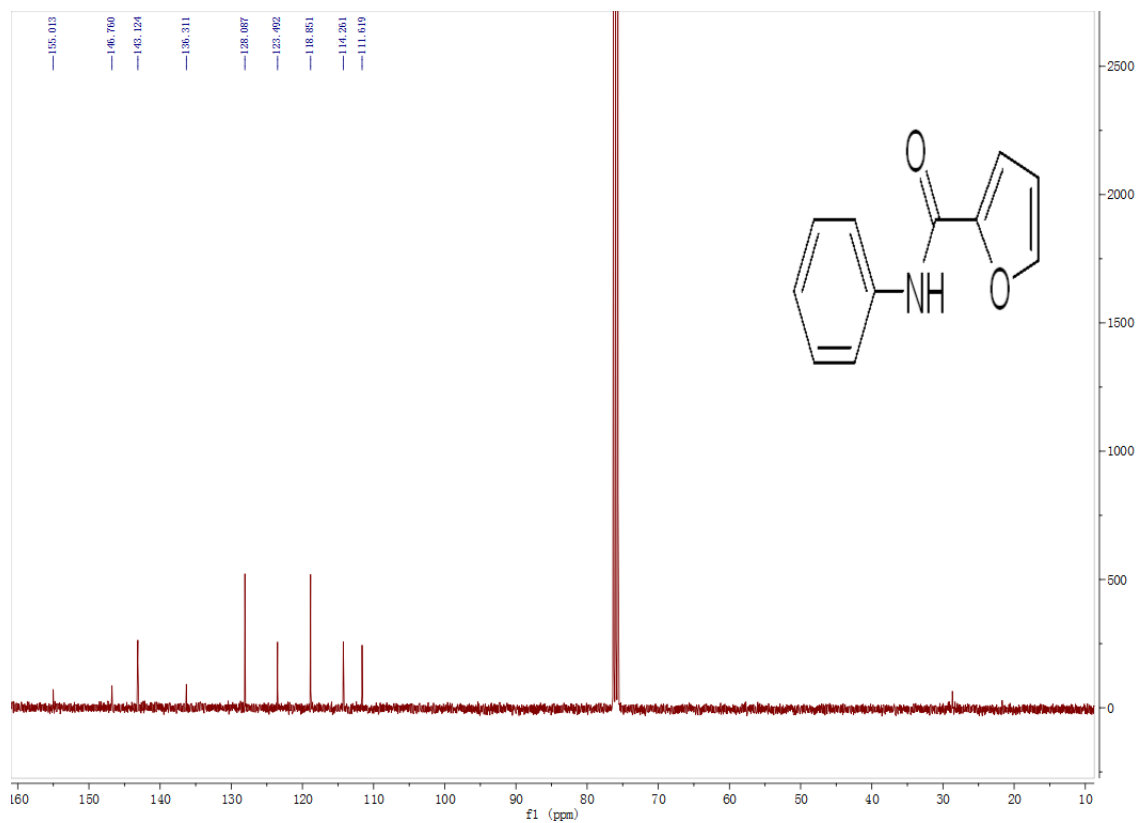

4ac

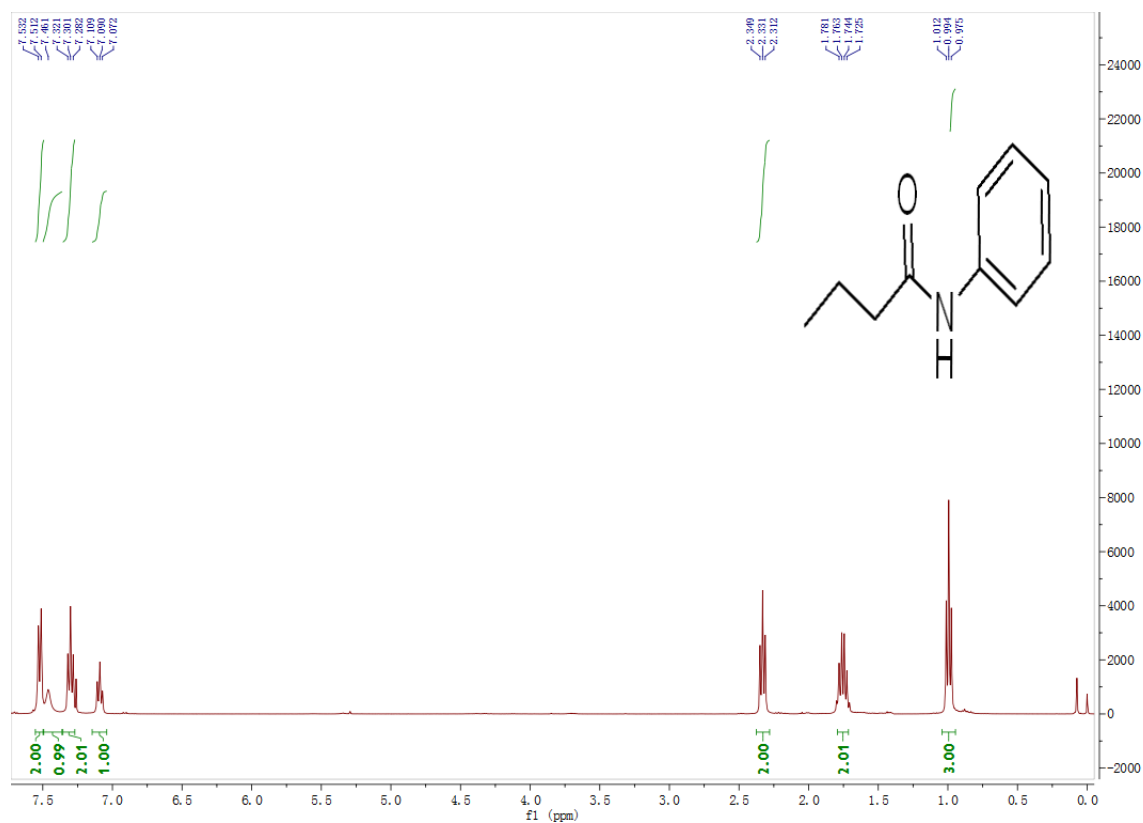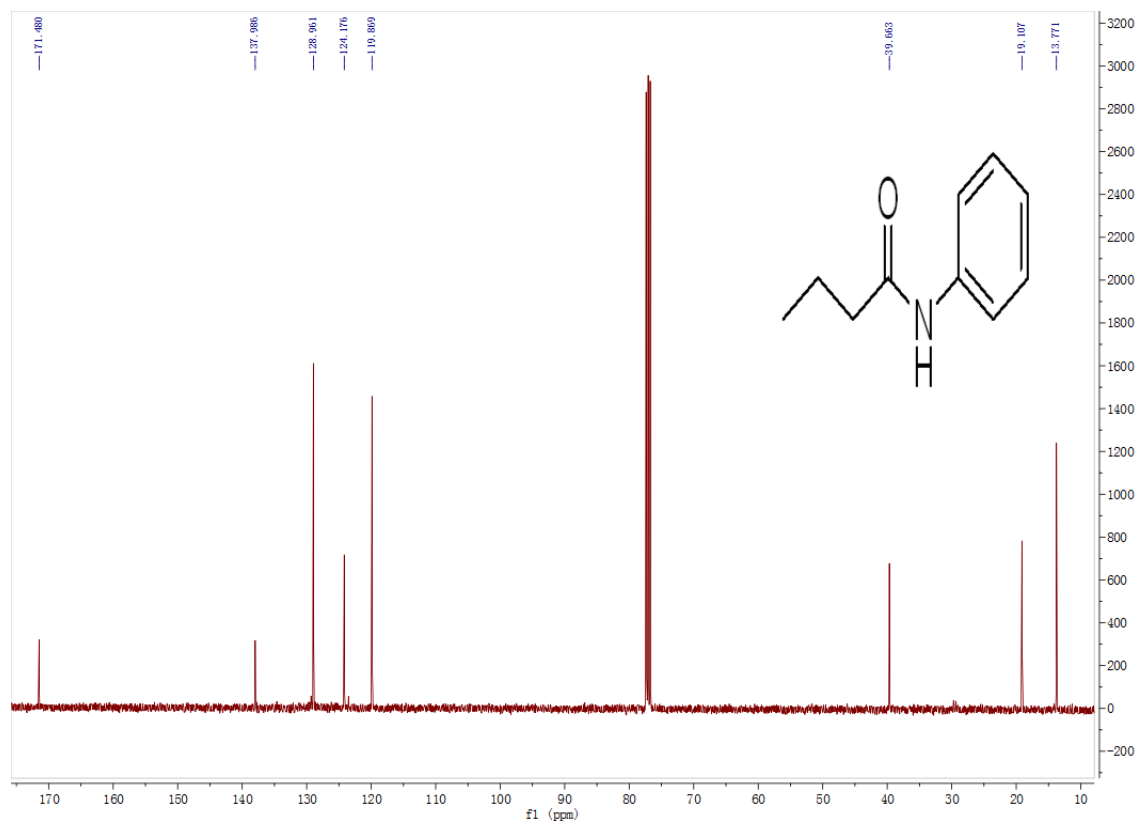

4af

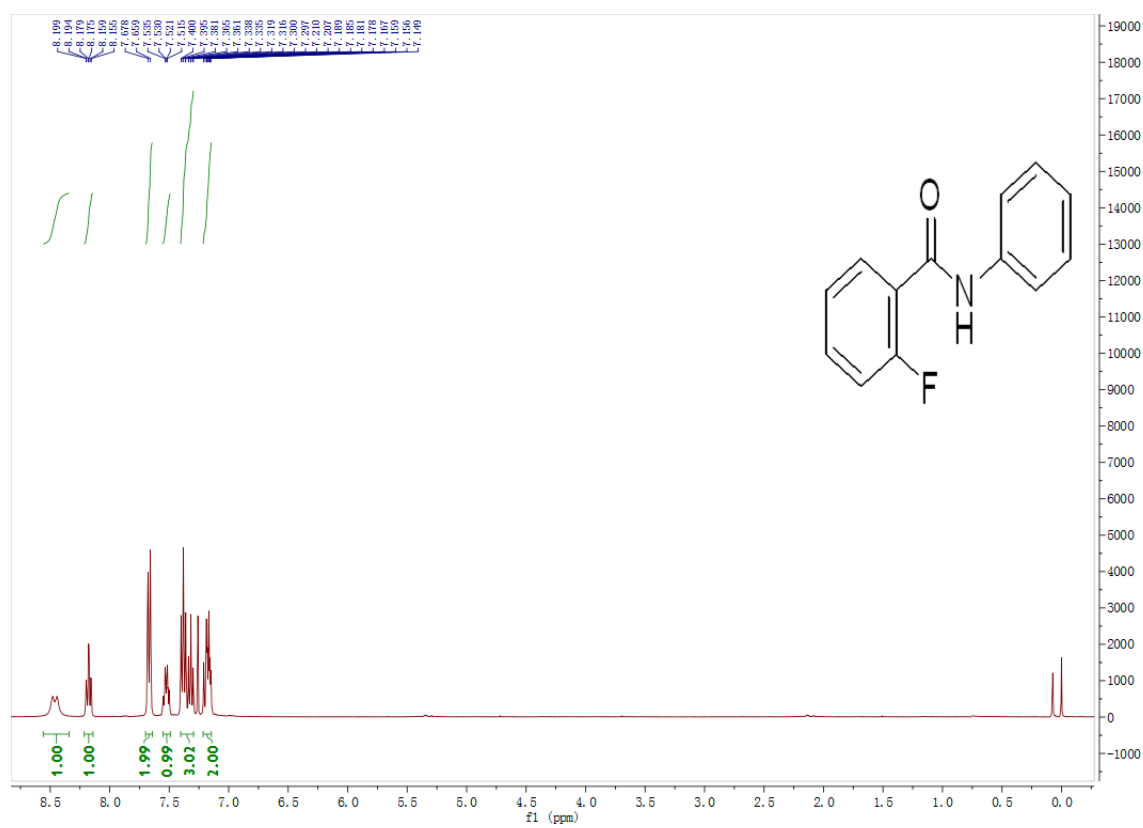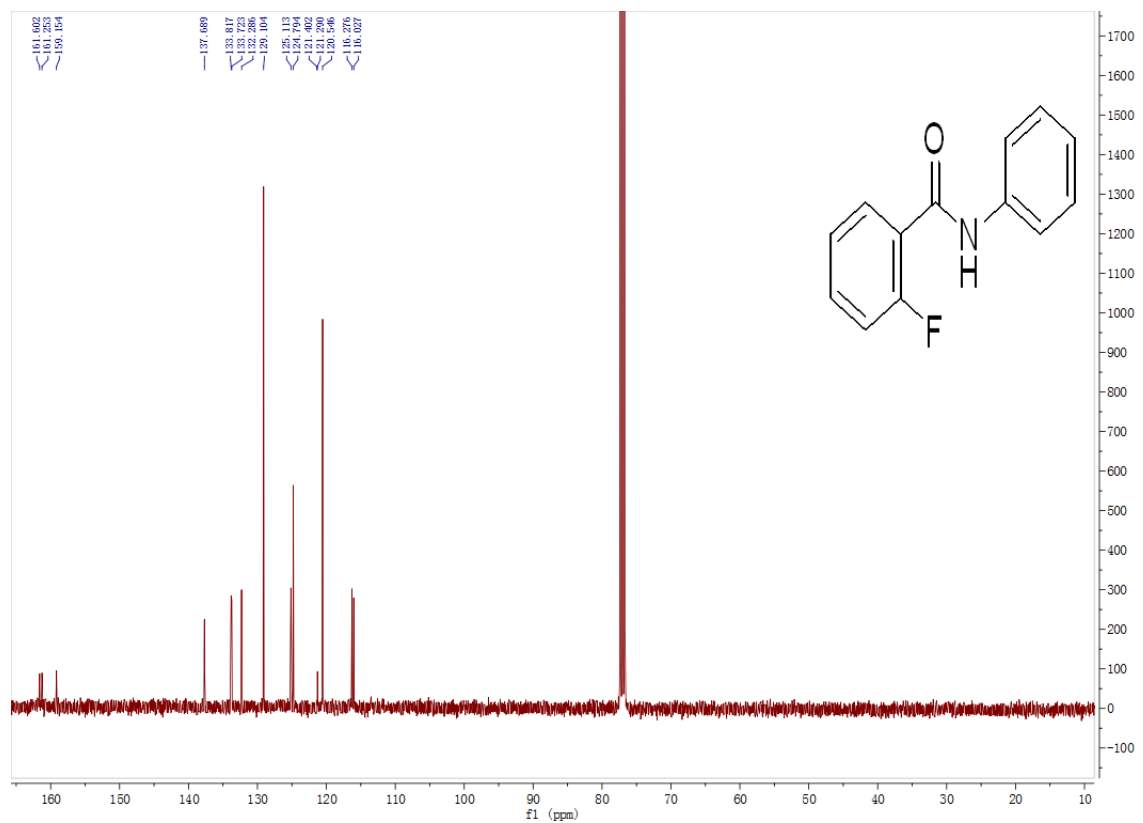

Supplement: c5qo00125k1.pdf [file c5qo00125k1.pdf]
